1 **Cell-type specific transcriptional adaptations of nucleus accumbens interneurons to**  
2 **amphetamine**

3

4 David A. Gallegos, Melyssa Minto, Fang Liu, Mariah F. Hazlett, S. Aryana Yousefzadeh, Luke  
5 C. Bartelt, and Anne E. West\*

6

7 Department of Neurobiology

8 311 Research Drive, Bryan Research 301D

9 Duke University Medical Center, Box 3209

10 Durham, NC 27710

11 \*Corresponding author, west@neuro.duke.edu

12

13

14

15 **Abstract:**

16 Parvalbumin-expressing (PV+) interneurons of the nucleus accumbens (NAc) play an essential  
17 role in the addictive-like behaviors induced by psychostimulant exposure. To identify molecular  
18 mechanisms of PV+ neuron plasticity, we isolated interneuron nuclei from the NAc of male and  
19 female mice following acute or repeated exposure to amphetamine (AMPH) and sequenced for  
20 cell type-specific RNA expression and chromatin accessibility. AMPH regulated the  
21 transcription of hundreds of genes in PV+ interneurons, and this program was largely distinct  
22 from that regulated in other NAc GABAergic neurons. Chromatin accessibility at enhancers  
23 predicted cell-type specific gene regulation, identifying transcriptional mechanisms of  
24 differential AMPH responses. Finally, we observed dysregulation of multiple PV-specific,  
25 AMPH-regulated genes in an *Mecp2* mutant mouse strain that shows heightened behavioral  
26 sensitivity to psychostimulants, suggesting the functional importance of this transcriptional  
27 program. Together these data provide novel insight into the cell-type specific programs of  
28 transcriptional plasticity in NAc neurons that underlie addictive-like behaviors.

29

30 **Introduction:**

31 Drugs of abuse, including the psychostimulants amphetamine (AMPH) and cocaine, lead to  
32 addiction by driving progressive and lasting adaptations in the function of neurons within the  
33 mesolimbic dopamine reward circuit<sup>1</sup>. Psychostimulant-induced changes in gene transcription  
34 play an essential role in this process by persistently altering the functional connectivity of  
35 neurons in reward circuits<sup>2</sup>. These transcriptional responses can be accompanied by regulation of  
36 the epigenome, including dynamic modifications of histone proteins and direct modifications to  
37 genomic DNA<sup>3,4</sup>. These biochemical marks may indicate fundamental changes to chromatin  
38 architecture in psychostimulant-activated neurons, or they could reflect the differential activation  
39 of pre-existing chromatin states<sup>5</sup>. Importantly, because chromatin architecture is highly cell-type  
40 specific, elucidating the relationship between chromatin regulation and gene transcription  
41 requires isolation and differential analysis of specific cell types from heterogeneous brain  
42 regions.

43         The Nucleus Accumbens (NAc) is a key region mediating the development and  
44 expression of addictive-like behaviors, and it is a major locus of psychostimulant-induced  
45 transcriptional and synaptic changes. The cellular and molecular consequences of  
46 psychostimulant-exposure have been well-documented in Spiny Projection Neurons (SPNs),  
47 which are the most numerous NAc neurons and provide the main output from this brain region.  
48 However, a growing number of studies suggest functions of local circuit interneurons of the NAc  
49 in the regulation of addictive-like behaviors. Despite comprising only a few percent of all NAc  
50 neurons, interneurons can exert dominant roles over SPN output<sup>6</sup>. For example, cholinergic  
51 interneurons are activated by cocaine and optogenetic suppression of this activity impairs  
52 cocaine-induced conditioned place preference<sup>7</sup>. By contrast, repeated cocaine exposure reduces

53 the excitability of Somatostatin-expressing (SST+) GABAergic interneurons of the NAc, yet  
54 optogenetic activation and suppression of these neurons respectively enhanced and impaired  
55 cocaine-induced place preference<sup>8</sup>. Diverse consequences of altered interneuron activity likely  
56 arise from the ways these cells modulate SPN activity. However, the circuit-level mechanisms of  
57 NAc interneuron function are only beginning to be elucidated.

58 PV+ GABAergic interneurons are especially potent regulators of feed-forward inhibition  
59 in local striatal circuits, and experimental manipulations have implicated these neurons in long-  
60 lasting NAc circuit adaptations that promote addictive behaviors<sup>9, 10</sup>. PV+ interneurons robustly  
61 fire in response to psychostimulant exposure *in vivo*, and withdrawal after repeated cocaine  
62 exposure further increases their excitability<sup>11, 12</sup>. Excitatory inputs from basolateral amygdala to  
63 PV+ interneurons in the NAc shell are enhanced following cocaine self-administration, resulting  
64 in increased feedforward inhibition of NAc SPNs and more efficient encoding or training of the  
65 operant behavior<sup>13</sup>. Blocking neurotransmitter release from NAc PV+ interneurons prevents the  
66 expression of locomotor sensitization and conditioned place preference induced by repeated  
67 AMPH<sup>14</sup>. PV+ interneuron silencing leads to a global disinhibition of both D1 and D2 dopamine  
68 receptor expressing SPNs in the NAc, suggesting that blocking the inhibitory function of these  
69 interneurons may impair the expression of addictive-like behaviors by disrupting the SPN  
70 ensembles that encode the reward-related behavior<sup>14, 15</sup>.

71 Given the challenge of isolating interneuron populations from the brain for biochemical  
72 assays, little is known about psychostimulant-induced gene transcription and chromatin plasticity  
73 in interneurons. However, in our prior studies of the methyl-DNA binding protein MeCP2 we  
74 made the incidental discovery that psychostimulant drugs of abuse selectively induce MeCP2  
75 phosphorylation at Ser421 in PV+ GABAergic interneurons of the NAc<sup>16</sup>. Furthermore, we

76 found that transgenic mice bearing a phosphorylation site mutation (Ser421Ala) knocked into  
77 *Mecp2* both rendered them behaviorally supersensitive to psychostimulants and caused  
78 dysregulation of AMPH-dependent Fos expression in NAc PV interneurons<sup>17, 18</sup>. Here, to study  
79 both chromatin and gene expression regulation in NAc interneurons following AMPH exposure,  
80 we used the Isolation of Nuclei Tagged in Specific Cell Types (INTACT) transgenic mouse  
81 model<sup>19</sup> to purify nuclei from PV+ or SST+ interneurons of the NAc. We identified hundreds of  
82 AMPH-regulated genes in both populations of interneurons and used differential patterns of  
83 chromatin accessibility to discover their mechanisms of cell-type specific regulation. Taken  
84 together these studies significantly expand our understanding of the transcriptional plasticity  
85 mechanisms that underlie the function of NAc interneurons in the neural response to  
86 psychostimulant drugs of abuse.

87

88

89

90

91 **Results**

92 *Isolation of NAc interneuron nuclei enables cell type-specific sequencing*

93 To isolate NAc interneurons for gene expression and chromatin accessibility measures,  
94 we genetically tagged the nuclei of specific neuronal cell-types using INTACT transgenic mice<sup>19</sup>  
95 (**Fig. 1A-C**). When were crossed with *Pvalb*-IRES-Cre or *Sst*-IRES-Cre mouse lines, the nuclear  
96 Sun1-GFP transgene colocalized with PV protein (**Fig. 1D**) or *Sst* RNA (**Fig. 1E**).  
97 Immunisolated GFP+ NAc nuclei from these mice (IP) showed enrichment for known cell-type  
98 markers compared to the unbound fraction (UF) by qPCR (**Fig S1A,B**) showing that this method  
99 is able to specifically isolate interneuron subtypes in NAc.

100 Most neurons in the NAc are GABAergic, with Spiny Projection Neurons (SPNs)  
101 representing the predominant cell type<sup>20</sup>. By contrast, each class of GABAergic interneuron  
102 comprises only a few percent of the total neurons<sup>6</sup>. To identify genes that are enriched in PV+  
103 and SST+ interneurons, we performed RNA-seq on INTACT purified PV+ or SST+ nuclei from  
104 single mice (n=9 *Pvalb*-Cre, n=7 *Sst*-Cre) and identified genes that were differentially expressed  
105 relative to the UF from each respective pulldown. Although nuclei contain only a subset of total  
106 cellular RNA, prior studies have shown that nuclear RNA-seq (nucRNA-seq) gives a  
107 quantitatively accurate assessment of cellular gene expression that is robustly preserved upon  
108 dissociation of adult brain tissue<sup>21</sup>.

109 We identified 3145 genes including *Pvalb* (**Fig. 1F**) that were enriched in NAc PV+  
110 interneurons nuclei relative to the UF of *Pvalb*-IRES-Cre mice, and 3108 genes that were de-  
111 enriched in the PV+ IP (**Fig. 1G; Table S1**). We identified 2273 genes including *Sst* (**Fig. 1H**)  
112 that were enriched in the SST+ IP nuclei relative to the *Sst*-IRES-Cre UF, and 2522 genes that  
113 were de-enriched in the SST+ IP (**Fig. 1I; Table S1**). Among the IP-enriched genes, we found

114 known markers of interneuron function, such as the voltage-gated potassium channel *Kcnc1* in  
115 PV+ neurons<sup>22</sup> (**Fig. 1J**), the enzyme *Nos1* in SST+ neurons<sup>23</sup> (**Fig. 1K**). For both strains, the  
116 SPN marker *Ppp1r1b*, which encodes the signaling protein DARPP-32, was significantly lower  
117 in the IP nuclei relative to the fraction in the UF, consistent with the expectation that SPNs  
118 comprise the major fraction of cells found in the UF (**Fig. 1J, K**).

119

120 *AMPH induces a rapid program of transcription that overlaps between NAc neuron types*

121 Neuronal activation induces multiple waves of stimulus-regulated gene transcription that  
122 can be separated by their timing and underlying mechanisms, including both a rapid and a  
123 delayed program of primary response genes (PRGs) driven by the post-translational modification  
124 of constitutively expressed transcription factors, as well as a delayed program of secondary  
125 response genes (SRGs) mediated by transcription factors (TFs) synthesized in the primary  
126 wave<sup>24</sup>. To identify rapid PRGs induced by AMPH exposure in NAc GABAergic interneurons,  
127 we purified PV+ or SST+ interneurons from the NAc of mice 35min following an injection of  
128 either saline as control or 3mg/kg AMPH in an open field chamber (**Fig. 2A**). As expected, acute  
129 AMPH administration induced significant increases in open-field locomotor activity (**Fig. 2B**).  
130 nucRNA-seq confirmed enrichment of PV+ and SST+ cell-type specific markers in the  
131 pulldowns relative to the UFs (**Fig. 2C**) and significant AMPH-dependent induction of the rapid  
132 PRG *Fos* in nuclei of PV+ neurons, SST+ neurons, and SPNs of the combined UF from both IPs  
133 (**Fig. 2D**).

134 At this short time point after AMPH exposure, we detected a relatively small number of  
135 changes in gene expression in any of the cell types (**Fig. 2E-G, Table S2**). In all three cell  
136 populations we observed an upregulation of a common set of rapid PRG TFs including members

137 of the Fos and Nur families (**Fig. 2H**). These data are consistent with prior studies that found the  
138 overall rapid PRG transcriptional regulation program to be largely conserved between different  
139 types of neurons<sup>25</sup>. However, we did detect differential induction for specific family members in  
140 the rapid PRGs TF program, with *Nr4a2* showing induction in PV+ but not SST+ neurons (**Fig.**  
141 **2I**), and *Egr3* induction in the UF and SST+ neurons, but not PV+ neurons (**Fig. 2I**).

142 Beyond the rapid PRG TFs, other genes rapidly induced by AMPH were largely  
143 divergent between the NAc GABAergic cell types we profiled, though they include gene  
144 products with known functions in plasticity (**Fig. 2H, Table S2**). Only in the UF fraction did we  
145 see induction of the canonical neuronal activity-regulated genes *Arc*, *Pcsk1*, *Per2*, and *Rheb*,  
146 many of which have been shown to function in SPNs to regulate cellular and behavioral  
147 responses to drugs of abuse<sup>26, 27</sup>. Only SST+ neurons showed AMPH-dependent induction of  
148 *Myo5b*, a calcium-regulated myosin motor that mediates recycling endosome trafficking in the  
149 context of LTP<sup>28</sup>. In PV+ neurons, many of the AMPH-induced genes are components of  
150 intracellular signaling pathways, though few of these genes have been studied as stimulus-  
151 regulated in the past. However, several have been implicated in neurological or psychiatric  
152 disorders, including the ubiquitin ligase *Cul3* in ASD and schizophrenia<sup>29</sup>, the nucleocytoplasmic  
153 transport protein *Ranbp2* in neurodegeneration<sup>30</sup>, and the topoisomerase *Top2b* for long gene  
154 regulation in ASD<sup>31</sup>. These data confirm that we can discover novel molecular programs of  
155 neuronal plasticity by comparing AMPH-regulated genes among distinct GABAergic cell types  
156 in the NAc.

157

158 *AMPH induces cell-type specific late gene programs in NAc interneurons*



159 To identify the delayed PRGs and SRGs regulated by AMPH, we used INTACT to purify  
160 PV+ or SST+ interneurons from the NAc of mice 3hrs following an injection of either saline or  
161 AMPH in an open field chamber (**Fig. 3A**). We saw a robust effect of AMPH administration on  
162 locomotor activity in the open field (**Fig. 3B**), and we confirmed by nucRNA-seq that the  
163 interneuron markers *Pvalb* and *Sst* were enriched in their respective IP fractions when compared  
164 to the combined UF and to each other (**Fig. 3C**). We verified AMPH-dependent induction in the  
165 UF of *Bdnf*, which is an established delayed PRG<sup>24</sup> and we confirmed the absence of *Bdnf* signal  
166 in the PV+ and SST+ nuclei harvested after AMPH exposure, as *Bdnf* is not inducible in  
167 GABAergic interneurons<sup>32</sup> (**Fig. 3D**).

168 We identified 143 AMPH-induced genes in NAc PV+ interneurons, 450 in SST+  
169 interneurons, and 98 in the combined UF (**Fig. 3E-G; Table S3**). In contrast to the overlapping  
170 programs of rapid PRGs induced by AMPH across cell types, the delayed gene programs were  
171 almost completely distinct (**Fig. 3H**). Gene Ontology (GO) analysis of the AMPH-regulated  
172 genes showed gene categories related to multiple signal transduction pathways in all three cell  
173 populations, suggesting, as we expected, that all these cells were experiencing intracellular  
174 adaptations to acute pharmacological stimulation (**Fig. S2A-F**). However, we were particularly  
175 interested to see upregulation selectively in PV+ neurons of genes in categories that affect  
176 synapse structure and function (positive regulation of synaptic transmission, positive regulation  
177 of synapse assembly, chemical synaptic transmission) and excitability (potassium ion transport,  
178 positive regulation of cytosolic calcium ion concentration) (**Fig. S2A**). By contrast, the  
179 downregulated pathways in PV+ neurons were predominantly related to general metabolic and  
180 biosynthetic pathways (**Fig. S2D**). These data suggest that following AMPH exposure, PV+

181 neurons may divert basal resources to functionally remodel their connectivity and inhibitory  
182 efficacy within local circuits, which could change the impact of their activation.

183         The category of cell adhesion was significantly enriched in both PV+ and SST+ AMPH-  
184 induced genes, including some genes already known to influence properties of interneuron  
185 synapses. For example, *Acan* encodes the perineuronal net (PNN) protein Aggrecan (**Fig. 3I**).  
186 Knockout of Aggrecan disrupts PNNs and switches PV+ neurons to a high plasticity state *in*  
187 *vivo*<sup>33</sup>, and some prior studies have suggested roles for PNNs in neural plasticity induced by  
188 drugs of abuse<sup>34</sup>. *Cntnap4* (**Fig. 3J-L**) is a member of the neurexin superfamily of cell adhesion  
189 proteins that promotes presynaptic release of GABA from PV+ interneurons. Knockout of  
190 *Cntnap4* augments dopamine release in the NAc and dampens inhibition from PV+  
191 interneurons<sup>35</sup>.

192         Notably, although the AMPH-dependent induction of genes is largely cell-type specific,  
193 we observed that most of the inducible genes were expressed under basal conditions in more than  
194 one NAc neuronal population. For example, we detected significant enrichment of *Acan* in both  
195 PV+ and SST+ interneurons compared with the UF but find a selective induction of *Acan* by  
196 AMPH only in PV+ neurons and not SST+ neurons (**Fig. 3I**). For *Cntnap4*, by RNAseq we  
197 observed expression in both PV+ and SST+ neurons as well as the UF but only saw significant  
198 AMPH-induced increases in *Cntnap4* in PV+ neurons (**Fig. 3J**). We validated this observation  
199 with quantitative FISH, confirming that both *Ppp1r1b*+ SPNs and *Pvalb*+ interneurons within  
200 the NAc express *Cntnap4* (**Fig. 3K**) but only *Pvalb*+ interneurons show a significant increase in  
201 *Cntnap4* signal following AMPH when compared to surrounding PV-, *Cntnap4*-expressing cells.  
202 (**Fig. 3L**).

203

204 *Stable chromatin accessibility landscapes in NAc cells following AMPH exposure*

205           Because enhancer usage can be highly cell-type specific even for genes with broad  
206 expression patterns<sup>36</sup>, we examined chromatin accessibility in NAc interneurons to determine  
207 possible transcriptional mechanisms of cell-type specific AMPH regulation. To characterize  
208 chromatin accessibility for TF binding genome-wide, we used the Assay for Transposase-  
209 Accessible Chromatin (ATAC-seq) on neuronal nuclei purified by INTACT. In AMPH-naïve  
210 mice, PV+ and SST+ interneurons have a unique and replicable chromatin accessibility  
211 landscape that distinguishes them from each other and from the GABAergic SPNs that  
212 predominate in the UFs (**Fig. 4A-C**). When compared to their respective UFs, we find >60,000  
213 differentially accessible regions of chromatin uniquely accessible in PV+ and SST+ interneurons  
214 genome wide. (**Table S4**). Conversely, we find 46,348 regions that are uniquely accessible in the  
215 combined, SPN-enriched UF. More modestly, we find ~5000 unique differentially accessible  
216 regions between immunoprecipitated PV+ and SST+ interneurons. Consistent with prior  
217 studies<sup>37, 38</sup>, only a small fraction (<10%) of the differentially accessible sites were found at gene  
218 promoters, whereas the vast majority occur at inter- and intragenic sites that are likely to function  
219 as distal transcriptional regulators (**Fig. 4D**).

220           Some studies have reported dynamic changes in chromatin accessibility following stimuli  
221 that lead to the activation of rapid PRG TFs<sup>39, 40, 41</sup>. These changes may reflect the concerted  
222 eviction of histones by RNA polymerase II (RNAPolII) during active transcription or the  
223 recruitment of rapid PRG TFs to regulatory elements driving subsequent chromatin remodeling.  
224 Given that we observed robust and overlapping programs of rapid PRG TF induction in all our  
225 NAc nuclear fractions following AMPH (**Fig. 2**), we asked whether this induction was associated  
226 with changes in chromatin accessibility in PV+ neurons or the corresponding SPN-enriched UF.

227 We administered either saline or AMPH to mice in the open field and harvested PV+  
228 neurons by INTACT 60min later (**Fig. S3A**). The accessibility landscape of PV+ interneurons in  
229 both conditions was comparable to that of drug-naïve mice and clearly distinguished from  
230 accessibility in the UF (**Fig. S3B**). However, acute AMPH exposure did not induce any  
231 substantial changes in chromatin accessibility either in PV+ interneurons or in the UF (**Fig. 4E-**  
232 **F; Table S5**). This stability of chromatin accessibility was evident even at known regulatory  
233 elements controlling production of the rapid PRG TFs despite their AMPH-induced transcription,  
234 as shown for *Fos* (**Fig. 4G**) and other rapid PRGs (**Fig S3C**). To determine whether changes in  
235 chromatin accessibility might require repeated exposure to AMPH, we next performed ATAC-  
236 seq following a 7d repeated AMPH locomotor sensitization paradigm (**Fig. S3D**). 24hrs  
237 following the final AMPH administration we harvested PV+ nuclei by INTACT for ATAC-seq.  
238 This stimulus was associated with significant differential expression of 361 transcripts within  
239 PV+ cells (**Fig. S3E, Table S6**) across various GO categories (**Fig. S3F**). 6 of the chronic  
240 AMPH-regulated genes overlapped the set changed 3hr after acute AMPH, suggesting persistent  
241 changes in transcription following repeated AMPH-exposure (**Table S6**). Nonetheless, we again  
242 observed no substantial changes in accessibility in either the PV+ or the UF fractions after  
243 repeated AMPH exposure (**Fig. S3G; Table S7**).

244

245 *Single-nucleus RNA-Seq of PV+ nuclei reveals rapid PRG induction in multiple PV+ subtypes*

246 By immunostaining we found that only a small percentage of PV+ neurons (~15%) show  
247 robust, AMPH-dependent increases in Fos protein levels (**Fig. S4A,B**). We thus considered the  
248 possibility that heterogeneity in our purified PV+ nuclear fraction could mask chromatin  
249 accessibility dynamics in a subset. To determine whether molecularly identifiable PV+ neuron

250 subtypes were distinguishable within our purified population, we used fluorescence-activated  
251 nuclear sorting (FANS) to isolate Sun1-GFP tagged nuclei from *Pvalb*-Cre mice for single  
252 nuclear RNA sequencing (snRNA-seq) on the 10X Genomics platform. We harvested and pooled  
253 NAc nuclei from mice (Sal n=3, AMPH n=4) 35min following an injection of either Sal or  
254 AMPH in the open field (**Fig. S4C,D**). Prior to FANS, we incubated nuclei from each condition  
255 with unique lipid-modified oligonucleotides (LMOs)<sup>42</sup> to allow for multiplexing and *post-hoc*  
256 bioinformatic identification of nuclei from the saline and AMPH-treated mice.

257         After filtering GFP captured cells for *Pvalb* expression we successfully recovered a total  
258 of 787 PV/GFP+ nuclei with a mean read depth of 6,930 counts per nucleus and a median 2,968  
259 genes sequenced per nucleus (**Fig. S4E; Table S8**). We performed dimensionality reduction via  
260 principal components analysis (PCA) for generation of a UMAP that defined 7 clusters of PV+  
261 neurons (**Fig. S4F-H**). These clusters all expressed the GABA synthesizing enzyme *Gad1*, which  
262 is enriched in PV+ interneurons<sup>43</sup> (**Fig. S4I**). None of the clusters contained the glial markers  
263 *Gfap* and *Sox10*, or the SPN marker *Ppp1r1b*, indicating that we had little contamination from  
264 other major cell types of the NAc in our filtered population.

265         The top two genes contributing the greatest amount of cell-to-cell variance across the  
266 *Pvalb*-expressing clusters were Adenosine Deaminase RNA Specific B2 (*Adarb2*) and cell  
267 surface heparan sulfate proteoglycan Glypican-5 (*Gpc5*) (**Fig. 5C**), both of which were most  
268 highly expressed in cluster 4. It was surprising to find *Adarb2* coexpressed in *Pvalb*+ neurons,  
269 because at least for cortical interneurons, *Adarb2* has been characterized as a marker of  
270 interneurons that originate from the caudal ganglionic eminence during development, whereas  
271 *Pvalb*+ neurons are thought to originate from the medial ganglion eminence<sup>44</sup>. We used FISH on  
272 coronal sections of NAc from mouse brain to confirm coexpression of *Adarb2* in a subset of

273 *Pvalb*<sup>+</sup> interneurons (**Fig. 5D**), whereas no colocalization was observed in cortex from the same  
274 mice (**Fig. S4J**). We subset our nuclei into *Pvalb*<sup>+</sup> and *Adarb2*<sup>+/-</sup> identities and performed  
275 differential expression analysis using Wilcoxon rank-sum tests to identify transcripts  
276 significantly differentially expressed between these two predefined clusters (**Fig. S4K**).

277 To determine whether AMPH-dependent gene induction was occurring within specific  
278 subsets of PV<sup>+</sup> neurons, we first deconvolved the multi-seq tags to confirm that we could detect  
279 induction of rapid PRG TFs in nuclei from the brains of AMPH-treated mice in our snRNA-seq  
280 data. The LMO barcodes were successfully amplified in a subset of our sequenced libraries  
281 allowing us to confirm enrichment of rapid PRGs in nuclei of mice exposed AMPH relative to  
282 those exposed to saline (n=60 Sal, n=187 AMPH) (**Fig. 5E,F; Fig. S4L,M**). We observed  
283 expression of rapid PRGs in all 7 PV<sup>+</sup> clusters, suggesting that the response to AMPH was not  
284 limited to a single cluster (**Fig. 5G**). We then created identities to subset our *Pvalb*<sup>+</sup> nuclei into  
285 *Adarb2*<sup>+/-</sup> groups (**Fig. 5H**), however, expression of rapid PRGs was similar in both subsets  
286 (**Fig. 5I**). Taken together these data confirm that a fraction of PV<sup>+</sup> neurons in the NAc respond  
287 to AMPH with a rapid PRG transcriptional response. However, this fraction is not a molecularly  
288 defined subset of PV<sup>+</sup> interneurons, suggesting it is more likely to be a result of differential  
289 functional or developmental connectivity.

290

### 291 *Cell-type specific transcriptional regulation of AMPH-dependent genes*

292 Although we saw no AMPH-dependent changes in chromatin accessibility, we did  
293 observe cell-type specific regions of accessible chromatin between our isolated cell types that  
294 correlated with cell-type specific AMPH-dependent transcriptional regulation (**Fig. 6A**). As  
295 such, we next asked if the unique landscapes of cell-type specific chromatin accessibility in

296 GABAergic NAc neuronal types could reveal differential binding sites for transcription factors  
297 (TFs) that mediate cell-type specific transcriptional responses to acute AMPH.

298 For all the genes induced in PV+ interneurons, SST+ interneurons or the combined UF at  
299 3hr post AMPH, we identified regions of differential chromatin accessibility between cell types  
300 at promoters (defined as 1kb on either side of the transcription start site) and putative enhancers  
301 (including the gene body and distal regions +/- 50kb on either side of the gene but excluding the  
302 promoter). We searched these regions for enriched transcription factor binding motifs, matched  
303 the motifs to TF families (**Fig. S5A**) and then identified those TFs that showed cell-type enriched  
304 (**Fig. 6B-D**) or AMPH-regulated expression (**Fig. S5B-D**) in the cell type that displayed open  
305 chromatin relative to other NAc cell types.

306 We found more diversity of enriched TF binding sites in the enhancers compared with the  
307 promoter regions, consistent with prior evidence that intragenic and distal enhancers are major  
308 regulators of cell-type specific gene expression<sup>5</sup>. Thus, we focused our analysis to identify TFs  
309 that bind these putative enhancers. In all three cell types we identified enrichment of binding  
310 sites for multiple TFs that show cell-type specific expression (**Table S9**). TCF4 was a top hit in  
311 both PV+ and SST+ neurons (**Fig. 6B,C**). Although TCF4 is broadly expressed in the cortex,  
312 within striatal regions its expression is limited to GABAergic interneurons<sup>45</sup>. TCF4 interacts with  
313  $\beta$ -catenin to regulate gene expression downstream of the Wnt signaling pathway. Little is known  
314 about the functions of Wnt signaling in addiction, but at least one study has found increased  
315 nuclear levels of  $\beta$ -catenin in the NAc following cocaine<sup>46</sup> and another showed important  
316 functions for NAc  $\beta$ -catenin in resilience to chronic stress<sup>47</sup>. PV+-specific enhancers also show  
317 enrichment for ETV1, a TF that controls intrinsic firing properties of PV+ cortical interneurons,  
318 where its abundance is activity-regulated<sup>48</sup>. By contrast, differentially accessible enhancers in the

319 SPN-enriched UF fraction showed enrichment of binding sites for members of the RFX and  
320 MEF2 families of TFs among others (**Fig. 6D**). *Rfx1,3*, and *4* are enriched in the UF fraction  
321 relative to the interneuron populations (**Fig. 6D; Table S1**) and *Rfx4* is rapidly induced by  
322 AMPH in the UF (**Fig. S5D; Table S2**). The psychostimulant-dependent regulation and function  
323 of the MEF2s in mediating cocaine-induced synapse plasticity in SPNs has been well  
324 described<sup>49</sup>.

325         These data suggest that the differential pattern of accessible enhancers near AMPH-  
326 regulated genes is maintained by cell-type specific control of the expression of TFs some of  
327 which are targets of regulation by psychostimulant-induced signaling cascades. However, we  
328 also found enrichment of binding sites in for rapid PRG TFs of the Fos, Jun, and Egr families  
329 (**Fig. S5B-D**), suggesting, as has been previously proposed, that these ubiquitous TFs work  
330 together with cell-type specific TFs to amplify programs of stimulus-regulated gene  
331 transcription<sup>50</sup>. The rapid induction of these TFs may drive the later cell-type specific programs  
332 of gene transcription by acting at cell-type specific sites of accessibility.

333

### 334 *Dysregulation of PV+ neuron gene regulation in MeCP2 Ser421Ala knockin mice*

335         To begin to determine which genes in PV+ interneurons might contribute to behavioral  
336 responses to drugs of abuse, we assessed PV+ neuron gene expression in the NAc of MeCP2  
337 Ser421Ala KI mice. These mice show both behavioral hypersensitivity to psychostimulants and  
338 altered AMPH-regulated Fos expression in NAc PV+ interneurons<sup>18</sup>, thus we hypothesized that  
339 gene expression differences in PV+ interneurons of these mice could reveal genes important for  
340 addictive-like behaviors. We used the RiboTag method<sup>51</sup> to enrich for actively translating  
341 mRNAs from NAc PV+ neurons of MeCP2 WT and Ser421Ala KI mice (**Fig. 7A**). We



342 confirmed co-expression of the HA tagged ribosomal subunit with PV in the NAc (**Fig. 7B**) and  
343 we found enrichment of *Pvalb* mRNA in the immunoprecipitated fraction from both MeCP2 WT  
344 and Ser421Ala KI mice relative to each input (**Fig. 7C**). Importantly, despite significant  
345 differences in the method of RNA isolation we saw substantial overlap in PV+-specific gene  
346 expression (**Fig. 7D**) comparing actively translating mRNAs isolated by ribosome pulldown  
347 (**Fig. 7A**) and the nascent RNAs isolated by nuclear pulldown (**Fig. 1A**).

348 We found 1082 transcripts differentially expressed in the PV+ interneurons of MeCP2  
349 Ser421Ala KI mice compared with their WT littermates (**Fig. 7E; Fig. S6A; Table S10**), a  
350 subset of which overlapped with our AMPH- induced PV+ program of delayed PRGs and SRGs.  
351 PV+ neurons of the MeCP2 Ser421Ala KI mice showed elevated expression of the PV-specific,  
352 AMPH-inducible genes *Cntnap4*, *Clstn2*, and *Acan* (**Fig. 7F-J; Table S10**), whereas expression  
353 of the canonical housekeeping gene *Gapdh* did not differ by genotype (**Fig. S6B-C**). Taken  
354 together, these data implicate these synaptic cell-adhesion gene products as promising candidates  
355 to modulate behaviorally-relevant properties of PV+ interneurons following exposure to  
356 psychostimulants.

357

## 358 **Discussion**

359 In this study, we conducted cell-type specific RNA and chromatin sequencing to provide  
360 comprehensive identification of the *in vivo* gene regulatory responses induced by AMPH in NAc  
361 interneurons of adult mice. Our data show that transcriptional changes induced by AMPH are  
362 largely unique to specific GABAergic cell-types. We did not observe dynamic changes in  
363 chromatin accessibility following AMPH exposure, however we did find evidence that  
364 differential accessibility of transcriptional enhancers correlates with cell-type specific responses

365 to AMPH. Finally, we identified a set of genes selectively regulated by AMPH in PV+ neurons  
366 that show altered expression in a mutant mouse strain that displays enhanced behavioral  
367 sensitivity to psychostimulants, suggesting potential for the functional importance of these gene  
368 expression programs for the expression of addictive-like behaviors.

369 Artificially enhancing or depressing the function of NAc PV+ interneurons modulates the  
370 expression of addictive-like behaviors<sup>13, 14</sup>. However, whether these neurons undergo  
371 transcriptional plasticity in response to psychostimulant exposure was unknown. Our data now  
372 identify hundreds of genes in NAc PV+ interneurons that show significant changes in their  
373 expression following acute or repeated AMPH exposure. Even though we were comparing gene  
374 regulatory programs between multiple GABAergic cell types within the NAc of individual mice,  
375 the genes regulated in each kind of neuron were largely distinct. These data suggest that even  
376 similar kinds of neurons experience distinct forms of cellular plasticity in response to a common  
377 stimulus, extending results of previous studies comparing more diverse cell types<sup>25, 32</sup>,

378 Examination of the PV+ specific AMPH-regulated gene expression program shows  
379 induction of cell adhesion proteins that localize to both pre- and postsynaptic sites. Taken  
380 together with the evidence that PV+ neurotransmitter release is positively correlated with the  
381 expression of addictive-like behaviors<sup>13, 14</sup>, these data suggest that PV+ interneurons may  
382 enhance their connectivity within NAc circuits following psychostimulant exposure. We  
383 validated PV+ interneuron specific induction of *Cntnap4*, a member of the neurexin superfamily  
384 that functions in presynaptic PV+ interneuron terminals to promote inhibitory synaptic strength  
385 by limiting the size of the synaptic cleft<sup>35</sup>. We observed PV+ specific induction of *Acan*,  
386 encoding aggrecan, a PNN component that plays an important role in organizing postsynaptic  
387 protein complexes in PV+ neurons<sup>33, 52</sup>. In addition, we see AMPH-induced PV+ neuron

388 upregulation of *Clstn2*, calstentenin-2, a member of the cadherin family of cell-adhesion  
389 molecules that functions to increase inhibitory synapse number through a mechanism that may  
390 involve interactions with the neurexin family of synapse organizing proteins<sup>53, 54</sup>. Expression of  
391 all three of these genes is elevated in PV+ neurons of AMPH-naïve MeCP2 Ser421Ala KI mice  
392 compared with their WT littermates, providing a potential mechanism for the enhanced  
393 behavioral sensitivity of these mice to psychostimulant drugs of abuse. Cell-type specific  
394 conditional knockouts of these gene products will be informative for their functional importance  
395 in addictive-like behaviors.

396 Cell adhesion genes as a category were also regulated in NAc SST+ interneurons  
397 following acute AMPH exposure, though the specific genes that were targets of regulation in the  
398 two cell types did not overlap. A prior study using FANS to isolate SST+ nuclei from the NAc  
399 also observed regulation of the cell adhesion genes *Ank3* and *Nrcam* after chronic cocaine  
400 exposure<sup>8</sup>. Like PV+ neurons, NAc SST+ interneuron activity is positively associated with the  
401 expression of locomotor sensitization and conditioned place preference after cocaine<sup>8</sup>, suggesting  
402 that enhancing local inhibition in the NAc could be a common circuit mechanism of addictive-  
403 like behaviors even if the molecular mediators of that state differ by interneuron cell type.

404 Although we observed largely cell-type specific programs of gene regulation by AMPH,  
405 many of the genes whose expression changed following AMPH exposure were expressed under  
406 control conditions in more than one NAc cell type. For example, we validated by smFISH that  
407 *Cntnap4* is expressed in both *Ppp1r1b*+ SPNs and *Pvalb*+ interneurons of the NAc but only  
408 induced by AMPH in the *Pvalb*+ population. We also find genes such as *Acan* that are expressed  
409 in both PV+ and SST+ neurons, but only AMPH-induced in PV+ neurons. Only one prior study  
410 directly compared differential stimulus-regulation of gene expression between populations of

411 interneurons in a single brain region, and they limited their analysis to only those gene products  
412 that were only expressed at baseline in a single class of interneurons relative to other cells in the  
413 population<sup>55</sup>. Thus, much remains to be learned about the underlying mechanisms that confer cell  
414 type specificity on stimulus-dependent regulation.

415         Our chromatin data suggest that the differential accessibility of intra- and intergenic  
416 enhancers underlies the differences in the AMPH responsivity of genes between cell types.  
417 Although recruitment of the RNA polymerase to the proximal promoter region of a gene is  
418 ultimately required for the activation of transcription, it is distal enhancers that mediate celltype-,  
419 developmental stage-, and stimulus-specific modulation of transcription<sup>5</sup>. The link between  
420 enhancer activity and chromatin accessibility reflects the differential binding of TFs at these  
421 regulatory elements. Indeed, when we examined the DNA sequences of putative enhancers near  
422 our cell-type specific AMPH-regulated genes, we observed enrichment of binding sites for  
423 numerous TFs that display cell-type specific patterns of expression. In this manner, the pattern of  
424 available enhancers would be permissive for the ability of a gene to show stimulus-dependent  
425 regulation. However, these differentially accessible regions were also enriched for binding sites  
426 for rapid PRG TFs, suggesting that the common induction of this rapid program in all AMPH  
427 responsive cells could instruct differential programs of stimulus responsive transcription by  
428 collaborating with cell-type specific TFs, similar to the mechanisms proposed for neuronal  
429 activity-dependent regulation of development<sup>56</sup>.

430         Is there a role for chromatin plasticity in AMPH-dependent regulation of interneuron  
431 gene expression? Some studies have shown intriguing evidence that activity-dependent induction  
432 of rapid PRG TFs can drive the formation of new regions of accessible chromatin, leaving a  
433 lasting mark on the chromatin landscape that could potentially function as a form of epigenetic

434 memory<sup>39, 40, 41</sup>. We did not find significant changes in chromatin accessibility in PV+  
435 interneuron nuclei or the SPN-enriched nuclei of the UF either following acute or repeated  
436 AMPH, though we cannot rule out that these changes could have occurred in a small subset of  
437 neurons. However, accessibility is only one measure of chromatin state. Previously we have  
438 shown that Ser421 phosphorylation of the methyl-DNA binding protein MeCP2 is selectively  
439 induced in NAc PV+ neurons following AMPH exposure<sup>16</sup>, and here we have identified a  
440 program of gene expression that is dysregulated in NAc PV+ neurons of mice bearing a non-  
441 phosphorylatable Ser421Ala mutation knocked into the *Mecp2* gene. MeCP2 is highly abundant  
442 in neurons and it binds globally across CpG and CpA methylated regions of the genome, yet acts  
443 locally at transcription start sites to control transcriptional initiation<sup>57, 58</sup>. Null mutations in  
444 MeCP2 are associated with cell-type specific changes in heterochromatin compaction and the  
445 sub-nuclear distribution of certain post-translationally modified histones<sup>59</sup>. Although the  
446 consequences of MeCP2 Ser421 phosphorylation on nuclear architecture is unknown, the ability  
447 of MeCP2 to nucleate protein complexes that mediate gene repression has been shown to be  
448 modulated by phosphorylation at Thr308, impeding the interaction of MeCP2 with the NCoR  
449 repressor complex<sup>60</sup>. Future studies using measures of chromatin architecture that can be scaled  
450 to the single cell level<sup>61, 62</sup> offer a promising approach to discovering novel mechanisms of  
451 AMPH-dependent chromatin regulation in NAc interneurons.

452

453

454

455 **Methods**

456 *Animals:* We performed all procedures under an approved protocol from the Duke University  
457 Institutional Animal Care and Use Committee. We used the following mouse strains: *Pvalb-*  
458 *IRES-Cre* (B6.129P2-*Pvalb*<sup>tm1(cre)Arbr/J</sup>, RRID:IMSR\_JAX:017320); *Sst-IRES-Cre* (*Sst*<sup>tm2.1(cre)Zjh/J</sup>,  
459 RRID:IMSR\_JAX:013044); INTACT (B6;129-*Gt(ROSA)26Sor*<sup>tm5(CAG-Sun1/sfGFP)Nat/J</sup>,  
460 RRID:IMSR\_JAX:021039, LSL-Sun1-GFP); RiboTag (B6J.129(Cg)-*Rpl22*<sup>tm1.1Psam/SjJ</sup>,  
461 RRID:IMSR\_JAX:029977); *Pvalb-2A-Cre* (B6.Cg-*Pvalb*<sup>tm1.1(cre)Aibs/J</sup>,  
462 RRID:IMSR\_JAX:012358); MeCP2 Ser421Ala KI (*Mecp2*<sup>tm1.1Meg</sup>, RRID:MGI:5302547)<sup>17</sup>. To  
463 generate PV/ or SST/INTACT mice, homozygous *Pvalb-IRES-Cre* or *Sst-IRES-Cre* males were  
464 bred with homozygous INTACT females to create compound heterozygous offspring, which  
465 were used in all subsequent experiments. Unless explicitly stated, all experiments used adult  
466 (P60-210) male and/or female mice that were heterozygous (HET) for both the *Pvalb-Cre* or *Sst-*  
467 *Cre* and INTACT alleles. To generate PV/RiboTag mice on the *Mecp2* Ser421Ala KI  
468 background, we crossed female *Mecp2* Ser421Ala/*Mecp2* WT HET mice to *Pvalb-2A-Cre* mice  
469 and then crossed the offspring to one another to generate MeCP2 Ser421Ala  
470 heterozygous;*Pvalb-2A-Cre* homozygous females. These mice were crossed to homozygous  
471 RiboTag male mice, and all experiments were conducted using the adult MeCP2 KI and WT  
472 hemizygous male littermates, all of which were heterozygous for the *Pvalb-2A-Cre* and RiboTag  
473 alleles.

474

475 *Open field locomotor activity and AMPH administration:* Mice were moved into the open-field  
476 testing room 24hrs before each open field trial. Each day mice were habituated to the open field  
477 for 1hr to establish baseline locomotor activity. On day one, after habituation, mice received a

478 mock injection and were returned to the open field. Locomotor activity was monitored as  
479 horizontal distance traveled (cm). To study acute responses to AMPH, on day 2, either saline (as  
480 a vehicle control) or 3mg/kg AMPH was administered (i.p.) and mice were returned immediately  
481 to the open field for 35min (RNA-seq timepoint 1, snRNA-seq), 60min (ATAC-seq), or 3hr  
482 (RNA-seq timepoint 2). To study chronic responses to AMPH, mice were habituated as above  
483 and then given either saline or 3mg/kg AMPH once each day for days 2-8 in the open field with  
484 their locomotor activity recorded for 90min post-injection. Mice were removed from the open  
485 field and rapidly sacrificed. The NAc was dissected and flash frozen in chilled 2-methyl butane,  
486 then stored at -80°C until nuclear isolation. Tissue used for the single nuclear RNA-seq study  
487 was processed fresh and moved immediately into the nuclear isolation protocol.

488

489 *INTACT nuclear isolation:* We used a variation of the published INTACT protocol<sup>19</sup>. For each  
490 experiment, the two NAc samples from each single mouse were thawed in ice-cold  
491 homogenization buffer (0.25M sucrose, 25mM KCl, 5mM MgCl<sub>2</sub>, 20mM Tricine-KOH). The  
492 tissue was minced with a razor blade and dounce homogenized using a loose pestle in 1.5mL of  
493 homogenization buffer supplemented with 1mM DTT, 0.15mM spermine, 0.5mM spermidine,  
494 172g/L kynurenic acid, and EDTA-free protease inhibitor. A 5% IGEPAL-630 solution was  
495 added to bring the homogenate to 0.3% IGEPAL-630, and the homogenate was further dounced  
496 with eight strokes of the tight pestle. When purifying RNA, RNaseOUT was added to all buffers  
497 at 60U/mL. When isolating nuclei for ATAC-seq, sodium butyrate was added to all buffers at a  
498 final concentration of 5mM. The sample was filtered through a 40µm strainer, mixed with 1.5mL  
499 of Working Solution (1:5 150mM KCl, 30mM MgCl<sub>2</sub>, 120mM Tricine-KOH, pH 7.8 Diluent  
500 and Optiprep Density Gradient Medium), overlaid with a gradient of 30% and 40% iodixanol,

501 and centrifuged at 10,000xg for 18min on an Sw41Ti rotor in a swinging bucket centrifuge at  
502 4°C. Nuclei were collected at the 30%-40% interface and pre-cleared by incubating with 20µL of  
503 protein G magnetic Dynabeads for 10min. After removing the beads with a magnet, the mixture  
504 was diluted with wash buffer (homogenization buffer plus 0.4% IGEPAL-630) and incubated  
505 with 10µL of 0.2mg/mL rabbit monoclonal anti-GFP antibody (Thermo Fisher Scientific Cat#  
506 G10362, RRID:AB\_2536526) for 30min. 60µL of Dynabeads were added, and the mixture was  
507 incubated for an additional 25 minutes. To increase yield, the bead-nuclei mixture was placed on  
508 a magnet for 30sec to 1min, completely resuspended by inversion, and placed back on the  
509 magnet. This was repeated 5-7 times. Samples were then re-placed on the magnet for 5min. 1mL  
510 of supernatant was removed as the Unbound Nuclear Fraction (UF) and placed on ice. The  
511 remaining beads were washed 3 times in 1mL of wash buffer followed by one wash in 6mL wash  
512 buffer. The 6mL was then sequentially applied to the magnet until all beads had been isolated.  
513 The final bead mixture was resuspended in 100µL wash buffer for downstream applications. All  
514 steps were performed on ice or in the cold room, and all incubations were carried out using an  
515 end-to-end rotator. 10µL of suspended UF nuclei were counted on a hemocytometer and 5000  
516 UF nuclei were removed for use in downstream applications as an approximate reference sample  
517 to the number of PV+ nuclei harvested per mouse (calculated range 3000-5000/mouse).

518

519 *Immunostaining:* Mice were anesthetized using isoflurane in a bell jar, and transcardially  
520 perfused using chilled 4% PFA in PBS. Brains were post fixed overnight at 4°C in 4% PFA in  
521 PBS, and subsequently sucrose protected in 30% Sucrose + PBS and sectioned coronally on a  
522 freezing microtome at 30µm. For IHC, sections were incubated for 60min in blocking buffer  
523 (PBS + 0.3% Triton X-100 and 10% Normal Goat Serum. Sections were then incubated



524 overnight at 4°C in blocking buffer and primary antibody. The following primary antibodies  
525 were used: Rabbit- $\alpha$ -GFP (1:200; ThermoFisher G10362; RRID RRID:AB\_2536526), Guinea  
526 Pig  $\alpha$ -Parvalbumin (1:1000; Synaptic Systems, 195 004RRID:AB\_2156476), Rabbit  $\alpha$ -c-Fos  
527 (1:750, Millipore PC38, Ab-5 RRID:AB\_2314421). After primary antibody incubation and  
528 washing 3 times with PBS, sections were incubated with Cy2, Cy3, or Cy5-conjugated secondary  
529 antibodies from Jackson Immunoresearch. Nuclei were counterstained with 1nM DAPI solution  
530 before mounting with Prolong Gold.

531  
532 *Fluorescent in situ hybridization (FISH):* We performed RNAscope FISH (ACD) according to  
533 the manufacturer's instructions to validate cell-type specific gene expression in the NAc and to  
534 validate quantification of differentially expressed genes detected by sequencing. Brains were  
535 harvested and flash-frozen in an isopentane/dry ice bath and embedded in Optimal Cutting  
536 Temperature (OCT) medium. 20 $\mu$ m coronal sections were cut on a cryostat and mounted on  
537 Superfrost Plus slides. We used the following probes (Advanced Cell Diagnostics): Mm-*Pvalb*  
538 (Cat no. 421931), Mm-*Pvalb*-C3 (Cat no. 421931-C3), Mm-*Sst* (Cat No. 404631), Mm-  
539 *Ppp1r1b*(Cat no. 405901), Mm-*Cntnap4* (Cat no. 498571), Mm-*Acan*-C2 (Cat no.439101), Mm-  
540 *Gapdh*-No-X-Hs (Cat no. 442871), Mm-*Fos*-C2 (Cat no. 316921-C2), Mm-*Adarb2* (Cat no.  
541 519971), and Probe Diluent (Cat no. 30041). Slides were counterstained with DAPI and  
542 coverslipped using ProLong Gold mounting medium. RNAscope fluorescent signal was imaged  
543 at 63X on a Leica SP8 confocal microscope and quantified using Fiji/ImageJ. At least 25 cells  
544 per group were quantified (across at least 2 slices per animal, 3-4 animals per genotype or  
545 treatment). Seven 0.5 $\mu$ m z-steps centered on the largest diameter DAPI signal were collapsed  
546 into a sum projection for each cell. Background fluorescence for each channel was calculated

547 from 4 sample ROIs and subtracted from the image. A ROI was then drawn around the DAPI  
548 signal, and the integrated density measured for each probe. In a subset of images, the average  
549 integrated density of single transcripts for each probe was measured across at least 80 9-pixel  
550 ROIs surrounding single spots. To calculate the number of transcripts per cell, the integrated  
551 density of each cell was divided by the single transcript value for that probe.

552

553 *nucRNA-seq and Analysis*: RNA isolation was performed using the RNaqueous Micro kit  
554 (Thermo Fisher) according to the manufacturer's instructions, excepting that DNase digestion  
555 was not performed at this step, as the downstream library preparation included a DNase step.  
556 RNA was eluted in 15 $\mu$ L elution buffer from which 4 $\mu$ L was used for qRT-PCR gene  
557 enrichment validation. For library preparation, all samples were processed using the Ovation  
558 SoLo RNA-Seq kit (NuGEN Technologies) according to the manufacturer's instructions. For the  
559 PCR amplification step, amplification cycles were determined individually for each sample  
560 according to the manufacturer's instructions. Library concentration was assessed with the Qubit  
561 2.0 fluorometer and checked for quality and fragment size on an Aligent Tapestation 2200 using  
562 a D1000 HS Tape. Samples were run on the Illumina HiSeq 4000 using a 50 base-pair, single-  
563 end read protocol by the Duke University sequencing core facility. Due to instrument retiring,  
564 the SST 3hr RNAseq timepoint and chronic AMPH ATAC-seq experiments were sequenced on  
565 an Illumina Novaseq6000 using a 50-base pair, paired-end, S-prime read protocol. FASTQ-  
566 formatted data files were processed using the Trimmomatic toolkit v0.38 to trim low-quality  
567 bases and Illumina sequencing adapters from the 3' end of the reads. Only reads that were 32nt or  
568 longer after trimming were kept for further analysis. Reads were mapped to the Gencode  
569 annotation GRCm38v72 version of the mouse genome and transcriptome using the STAR RNA-

570 seq alignment tool. Gene counts were compiled using the HTSeq tool. For this analysis, we used  
571 the standard method of only counting reads that mapped to known exons and reads with mapq >  
572 30 were used for the differential expression analysis. Prior to differential expression analysis,  
573 genes with a counts per million (CPM) <1 for any sample were excluded. Normalization and  
574 differential expression analyses were carried out using the DESeq2 Bioconductor package with  
575 the R statistical programming environment while accounting for batch, treatment, and PCR-  
576 bottlenecking effects. The false discovery rate was calculated to control for multiple hypothesis  
577 testing. In the case of cell-type specific genes, genes with FDR<0.05 were considered  
578 significantly differentially expressed. For cell-type specific stimulus-regulated genes, an  
579 FDR<0.1 was used. GO Analysis was conducted using the Database for Annotation,  
580 Visualization and Integrated Discovery (DAVID), with enriched Biological Function categories  
581 used for analysis.

582

583 *Q-RT-PCR*: 4µL of isolated RNA was primed with Oligo-dT and synthesized into cDNA by  
584 Superscript II. Quantitative SYBR green PCR was performed on a QuantStudio realtime PCR  
585 machine using previously validated exon-skipping primers to validate enrichment and activity-  
586 dependent gene induction: *Pvalb*: F – CTTTGCTGCTGCAGACTCCT, R-  
587 CTGAGGAGAAGCCCTTCAGA; *Sst*: F- CCCAGACTCCGTCAGTTTCT, R-  
588 CCTCATCTCGTCCTGCTC; *Gapdh*: F -CATGGCCTTCCGTGTTTCCT, R-  
589 TGATGTCATCATACTTGGCAGGTT; *Fos*: F-TTTATCCCCACGGTGACAGC, R-  
590 CTGCTCTACTTTGCCCTTCT; *Bdnf* (exon IV): F-  
591 CGCCATGCAATTTCCACTATCAATAA, R-GCCTTCATGCAACCGAAGTATG.

592

593 *ATAC-seq*: Omni-ATAC-seq was done as previously described<sup>63</sup> with the sole modification of an  
594 adjusted Tn5 volume (0.5 $\mu$ L/sample) to avoid over transposition in a low number of input nuclei.  
595 Briefly, 5000 UF nuclei or the entirety of the bead-bound immunoprecipitated fraction nuclei  
596 (IP) were resuspended in cold RSB buffer prior to the beginning of the Omni-ATAC procedure.  
597 Libraries were made as described with the added inclusion of a 1:1 volume library cleanup with  
598 Ampure XP beads. The quality of the raw reads was determined using FastQC v0.11.2. All  
599 adaptors and reads with quality < 30 were trimmed using cutadapt v1.8.3. The reads were then  
600 aligned using bowtie2 v2.3.4.3 against the Gencode annotation GRCm38v72 reference genome  
601 with no more than 1 mismatch. The aligned reads were sorted and we filtered out unmapped  
602 reads using bedtools v2.25.0. Samples with a fraction of reads in peaks (FRIP) <0.125 or with  
603 mapped reads <4X the mean mapped reads were excluded. Peaks were called by converting to a  
604 bed file using bedtools, filtering duplicates, and calling broad and narrow peaks using MACS2 v  
605 2.1.2 (parameters: --nomodel --shift 37 --ext 73) as suggested for ATAC peaks. The overhanging  
606 peak ends were clipped off the ends of chromosomes using KentUtils bedClipv302. The peaks for  
607 all samples in each comparison were merged (# peaks) to create a master peak file for a basis of  
608 comparison. Further analysis was carried out in R 3.4.4. A peak count matrix was creating using  
609 Rsubreadv1.28.1 to read in the ATAC counts from the merged peak regions. Prior to differential  
610 expression analysis, peaks with a CPM<1 in fewer than 3 samples were filtered out. DESeq2  
611 v1.18.1 was then used to perform the differential peak analysis using an adjusted p-value  
612 threshold of p<0.05 for significance. For visualization these peaks were converted into bigwigs  
613 using deepTools bamCoverage at 10bpresolution (parameters: -- normalizeUsing RPKM).  
614 Spearman correlation of the of the DESeq2 variance stabilized peak counts from each sample

615 was computed and plotted using the stats v 3.6.2 package and corrplot v 0.84 package in R  
616 respectively.

617

618 *Fluorescence activated nuclear sorting and single nucleus sequencing (FANS-snSeq)*: Fresh NAc  
619 from PV/INTACT mice (n=3 Saline, n=4 AMPH) were isolated, pooled by treatment and  
620 homogenized in homogenization buffer. PV+ nuclei were isolated according to the Isolation  
621 protocol above with the exception that samples were underlaid with only a 30% iodixanol  
622 solution – allowing for the generation of a nuclear pellet after centrifugation. Nuclei were then  
623 re-suspended, washed in homogenization buffer, and incubated with MULTI-seq lipid-modified  
624 oligos (LMOs) 5 or 6 to barcode nuclei from either the saline or AMPH condition respectively<sup>42</sup>.  
625 LMOs were added at a ratio of 10:1 oligo barcode to molecular (lipid) anchor and DAPI. The  
626 saline and AMPH treated nuclei were then pooled for FANS, loading onto the 10X chromium  
627 controller, and sequencing to avoid batch effects. PV+ nuclei were isolated using Fluorescent-  
628 Activated Cell Sorting (FACS) gating on double positivity for DAPI and GFP and sorted into  
629 homogenization buffer. Flow cytometry was performed and nuclei were sorted directly into a  
630 plate for 10X Genomics snRNA-Seq. 10X Genomics 3' Gene Expression library (v3 chemistry)  
631 was sequenced on Illumina Nextseq 550 in mid output mode. Raw BCL files were converted to  
632 fastqs using CellRanger v3.0.2 mkfastq. Fastq files were then aligned to the mm10-3.0.0\_pre-  
633 mRNA reference transcriptome and a count matrix was generated using CellRanger v3.0.2. This  
634 count matrix was used as the input to Seurat (v3.1.5) for downstream analysis.

635

636 *snRNA-seq Analysis*: snRNA-seq analysis was performed in R using Seurat v3.1.5. Cell Ranger  
637 count matrix of 2125 nuclei was read into Seurat using the Read10X command. Seurat object

638 was created using raw cell counts with baseline criteria of `min.cells = 3` and `min.features = 200`.  
639 For initial filtration for presumed doublets and low-read nuclei, the count matrix was filtered for  
640 nuclei containing more than 3000 and fewer than 15000 molecules detected (`nCount_RNA`),  
641 yielding a total of 1687 nuclei with an average of 2767 detected genes per cell and 6221 counts  
642 per cell detected. Nuclei of interest were subsequently filtered based on detectable expression of  
643 *Pvalb* transcripts  $>0.5$  using the `subset` command, yielding 787 nuclei for subsequent analyses.  
644 Data was log normalized using the `NormalizeData` command and highly variable genes were  
645 identified using the `FindVariableFeatures` command (`selection.method='vst'`, `nfeatures = 2,000`).  
646 We then performed Principal Component Analysis using `RunPCA` to compute 20 components  
647 followed by dimensionality reduction with Uniform Manifold Approximation and Projection  
648 (UMAP) via the `RunUMAP` command using the top 2000 genes with the highest variance. A  
649 shared nearest neighbor plot was generated using `FindNeighbors` integrating 4 dimensions and  
650 cell clustered using the `FindClusters` command with a `resolution=0.5`. We observed a significant  
651 inflection point in variance explained after PC4 and thus proceeded with the inclusion of these 4  
652 PCs in the generation of our UMAP. This number of dimensions was chosen for maximal  
653 variance integration while minimizing the propensity for over-clustering within an otherwise  
654 relatively homogeneous cell population. For between sub-type comparisons, identities were  
655 created based on minimum expression criteria of *Pvalb* and *Adarb2* and compared using  
656 Wilcoxon Rank Sum test via the `FindMarkers` command.

657

658 *Transcription factor motif analysis:* We searched regions around AMPH-induced, differentially  
659 expressed (DE) genes for transcription factor binding motifs in a cell-type specific manner. We  
660 considered genes upregulated in PV+ interneurons, SST+ interneurons, or the unbound fraction

661 (UF), which is enriched for SPNs. bedtools v2.27.1 was used to find peaks that were  
662 differentially accessible (DA) in each cell type and were either within the gene bodies of DE  
663 genes, their promoters, or distal regions within 50kb of the DE gene. Once each peak set was  
664 created, the peaks were expanded from the center to create a 500bp region for motif analysis.  
665 Motif enrichment analysis was carried out in Homer v4.10.4 separately for promoter regions and  
666 non-promoter regions (both within-gene and gene-distal regions). For the promoter motif  
667 enrichment, random peaks were chosen in the promoters of nonDE genes and used as  
668 background. For non-promoter peaks, the Homer-standard genomic regions matched for GC%  
669 were used as a background. Each significantly enriched motif ( $q < 0.05$ ) was mapped to its  
670 transcription factor gene/gene families and that transcription factor was then assessed for its  
671 relative gene expression in each cell type. Transcription factors that had enriched motifs and also  
672 showed differential expression in a specific cell-type transcript were considered putative  
673 regulators of the AMPH response in that cell type.

674

675 *RiboTag purification of cell-type specific translating RNA:* Ribotag purification of translating  
676 RNAs was performed with minor variations from the published protocol<sup>51</sup>. Briefly, NAc tissue  
677 was rapidly dissected and Dounce homogenized in a tissue weight to buffer volume ratio of 5%  
678 (0.6-1mL) of homogenization buffer (HB-S, 50mM Tris, 100mM KCl, 12mM MgCl<sub>2</sub>, 1% NP-  
679 40) supplemented with 200U/mL RNAaseOUT, 1X Protease inhibitor, 1mM DTT, 100ug/mL  
680 Cyclohexamide, and 1mg/mL Heparin. Homogenate was spun down at 10,000 RPM and the  
681 supernatant was moved to the immunoprecipitation step after removal of 80 $\mu$ L for input vs IP  
682 comparisons. To prepare the antibody-bead mixture, Dynabeads were first washed in 1X PBS  
683 before 10 $\mu$ L Rabbit  $\alpha$ -HA tag antibody (Abcam, #9110, RRID:AB\_307019) was added to 300 $\mu$ L

684 PBS+60 $\mu$ L Dynabeads and rotated at 4°C for 4hr. For immunoprecipitation, the remaining  
685 supernatant was subsequently combined with  $\alpha$ -HA antibody-bead mixture and rotated overnight  
686 at 4°C. Beads were isolated, washed 3 times in high-salt buffer, and lysed in Qiagen lysis buffer  
687 RLT for elution. RNA was subsequently extracted using the Qiagen RNeasy Mini Kit. SMART-  
688 Seq™ v4 Ultra™ Low Input RNA Kit (Takara Bio #634888) was used to convert RNA to  
689 cDNA, which was then amplified and sequenced using an Illumina Hi-Seq 2500.

690

691 *Statistical analyses:* Unless otherwise indicated, graphs show mean and SEM with individual  
692 points shown. For comparisons of averages, data were tested for normality using the Shapiro-  
693 Wilk (SW) test. For multiple-comparison tests of locomotor activity in response to treatment,  
694 rmANOVA was performed using PRISM (GraphPad) and Bonferroni-corrected pairwise tests  
695 were used *post hoc* to correct for multiple comparisons. P values <0.05 were considered to be  
696 significant. FDR<0.05 for Cell-type-specific genes, FDR<0.1 for AMPH/Genotype regulated  
697 nuclear or ribosomal RNAseq, and FDR<0.05 for ATAC-seq data were considered significant.

698

#### 699 **Data Availability**

700 RNA and ATAC sequencing data that support the findings of this study will be deposited at GEO  
701 immediately following submission (accession number pending). All other primary data are stored  
702 on a secure server at Duke University School of Medicine and are available from the  
703 corresponding authors upon request.

704

#### 705 **Code Availability**

706

707 Full coding implementation of all analysis tools can be found in complete alignment/analysis

708 pipelines available at <https://github.com/WestLabDuke/Psychostimulant-NAcInterneuron>.



709 **References**

- 710 1. Hyman SE, Malenka RC, Nestler EJ. Neural mechanisms of addiction: the role of  
711 reward-related learning and memory. *Annu Rev Neurosci* **29**, 565-598 (2006).  
712
- 713 2. Robison AJ, Nestler EJ. Transcriptional and epigenetic mechanisms of addiction. *Nat Rev*  
714 *Neurosci* **12**, 623-637 (2011).  
715
- 716 3. Feng J, *et al.* Role of Tet1 and 5-hydroxymethylcytosine in cocaine action. *Nature*  
717 *Neuroscience* **18**, 536-544 (2015).  
718
- 719 4. Lopez AJ, Siciliano CA, Calipari ES. Activity-Dependent Epigenetic Remodeling in  
720 Cocaine Use Disorder. *Handbook of experimental pharmacology* **258**, 231-263 (2020).  
721
- 722 5. Nord AS, West AE. Neurobiological functions of transcriptional enhancers. *Nat Neurosci*  
723 **23**, 5-14 (2020).  
724
- 725 6. Tepper JM, Tecuapetla F, Koos T, Ibanez-Sandoval O. Heterogeneity and diversity of  
726 striatal GABAergic interneurons. *Front Neuroanat* **4**, 150 (2010).  
727
- 728 7. Witten IB, *et al.* Cholinergic interneurons control local circuit activity and cocaine  
729 conditioning. *Science* **330**, 1677-1681 (2010).  
730
- 731 8. Ribeiro EA, *et al.* Transcriptional and physiological adaptations in nucleus accumbens  
732 somatostatin interneurons that regulate behavioral responses to cocaine. *Nature*  
733 *communications* **9**, 3149 (2018).  
734
- 735 9. Koos T, Tepper JM. Inhibitory control of neostriatal projection neurons by GABAergic  
736 interneurons. *Nat Neurosci* **2**, 467-472 (1999).  
737
- 738 10. Schall TA, Wright WJ, Dong Y. Nucleus accumbens fast-spiking interneurons in  
739 motivational and addictive behaviors. *Mol Psychiatry* **26**, 234-246 (2021).  
740
- 741 11. Wiltschko AB, Pettibone JR, Berke JD. Opposite effects of stimulant and antipsychotic  
742 drugs on striatal fast-spiking interneurons. *Neuropsychopharmacology* **35**, 1261-1270  
743 (2010).  
744
- 745 12. Winters BD, *et al.* Cannabinoid receptor 1-expressing neurons in the nucleus accumbens.  
746 *Proc Natl Acad Sci U S A* **109**, E2717-2725 (2012).  
747
- 748 13. Yu J, *et al.* Nucleus accumbens feedforward inhibition circuit promotes cocaine self-  
749 administration. *Proc Natl Acad Sci U S A*, (2017).  
750
- 751 14. Wang X, *et al.* Parvalbumin Interneurons of the Mouse Nucleus Accumbens are Required  
752 For Amphetamine-Induced Locomotor Sensitization and Conditioned Place Preference.  
753 *Neuropsychopharmacology* **43**, 953-963 (2018).  
754

- 755 15. Trouche S, *et al.* A Hippocampus-Accumbens Tripartite Neuronal Motif Guides  
756 Appetitive Memory in Space. *Cell* **176**, 1393-1406 e1316 (2019).  
757
- 758 16. Deng JV, Rodriguiz RM, Hutchinson AN, Kim I-H, Wetsel WC, West AE. MeCP2 in the  
759 nucleus accumbens contributes to neural and behavioral responses to psychostimulants.  
760 *Nature Neuroscience* **13**, 1128-1136 (2010).  
761
- 762 17. Cohen S, *et al.* Genome-Wide Activity-Dependent MeCP2 Phosphorylation Regulates  
763 Nervous System Development and Function. *Neuron* **72**, 72-85 (2011).  
764
- 765 18. Deng JV, *et al.* MeCP2 phosphorylation limits psychostimulant-induced behavioral and  
766 neuronal plasticity. *J Neurosci* **34**, 4519-4527 (2014).  
767
- 768 19. Mo A, *et al.* Epigenomic Signatures of Neuronal Diversity in the Mammalian Brain.  
769 *Neuron* **86**, 1369-1384 (2015).  
770
- 771 20. Gokce O, *et al.* Cellular Taxonomy of the Mouse Striatum as Revealed by Single-Cell  
772 RNA-Seq. *Cell Rep* **16**, 1126-1137 (2016).  
773
- 774 21. Bakken TE, *et al.* Single-nucleus and single-cell transcriptomes compared in matched  
775 cortical cell types. *PLoS One* **13**, e0209648 (2018).  
776
- 777 22. Massengill JL, Smith MA, Son DI, O'Dowd DK. Differential expression of K4-AP  
778 currents and Kv3.1 potassium channel transcripts in cortical neurons that develop distinct  
779 firing phenotypes. *J Neurosci* **17**, 3136-3147 (1997).  
780
- 781 23. Jaglin XH, Hjerling-Leffler J, Fishell G, Batista-Brito R. The origin of neocortical nitric  
782 oxide synthase-expressing inhibitory neurons. *Front Neural Circuits* **6**, 44 (2012).  
783
- 784 24. Tyssowski KM, *et al.* Different Neuronal Activity Patterns Induce Different Gene  
785 Expression Programs. *Neuron* **98**, 530-546 e511 (2018).  
786
- 787 25. Whitney O, *et al.* Core and region-enriched networks of behaviorally regulated genes and  
788 the singing genome. *Science* **346**, 1256780 (2014).  
789
- 790 26. Penrod RD, Thomsen M, Taniguchi M, Guo Y, Cowan CW, Smith LN. The activity-  
791 regulated cytoskeleton-associated protein, Arc/Arg3.1, influences mouse cocaine self-  
792 administration. *Pharmacol Biochem Behav* **188**, 172818 (2020).  
793
- 794 27. Szumlinski KK, *et al.* Homer proteins regulate sensitivity to cocaine. *Neuron* **43**, 401-413  
795 (2004).  
796
- 797 28. Wang Z, *et al.* Myosin Vb mobilizes recycling endosomes and AMPA receptors for  
798 postsynaptic plasticity. *Cell* **135**, 535-548 (2008).  
799

- 800 29. Dong Z, *et al.* CUL3 Deficiency Causes Social Deficits and Anxiety-like Behaviors by  
801 Impairing Excitation-Inhibition Balance through the Promotion of Cap-Dependent  
802 Translation. *Neuron* **105**, 475-490 e476 (2020).  
803
- 804 30. Cho KI, *et al.* Distinct and atypical intrinsic and extrinsic cell death pathways between  
805 photoreceptor cell types upon specific ablation of Ranbp2 in cone photoreceptors. *PLoS*  
806 *Genet* **9**, e1003555 (2013).  
807
- 808 31. King IF, *et al.* Topoisomerases facilitate transcription of long genes linked to autism.  
809 *Nature* **501**, 58-62 (2013).  
810
- 811 32. Spiegel I, *et al.* Npas4 regulates excitatory-inhibitory balance within neural circuits  
812 through cell-type-specific gene programs. *Cell* **157**, 1216-1229 (2014).  
813
- 814 33. Rowlands D, *et al.* Aggrecan Directs Extracellular Matrix-Mediated Neuronal Plasticity.  
815 *J Neurosci* **38**, 10102-10113 (2018).  
816
- 817 34. Lasek AW, Chen H, Chen WY. Releasing Addiction Memories Trapped in Perineuronal  
818 Nets. *Trends Genet* **34**, 197-208 (2018).  
819
- 820 35. Karayannis T, *et al.* Cntnap4 differentially contributes to GABAergic and dopaminergic  
821 synaptic transmission. *Nature* **511**, 236-240 (2014).  
822
- 823 36. Dickel DE, *et al.* Ultraconserved Enhancers Are Required for Normal Development. *Cell*  
824 **172**, 491-499 e415 (2018).  
825
- 826 37. Frank CL, *et al.* Regulation of chromatin accessibility and Zic binding at enhancers in the  
827 developing cerebellum. *Nat Neurosci* **18**, 647-656 (2015).  
828
- 829 38. Song L, *et al.* Open chromatin defined by DNaseI and FAIRE identifies regulatory  
830 elements that shape cell-type identity. *Genome Res* **21**, 1757-1767 (2011).  
831
- 832 39. Su Y, *et al.* Neuronal activity modifies the chromatin accessibility landscape in the adult  
833 brain. *Nat Neurosci* **20**, 476-483 (2017).  
834
- 835 40. Fernandez-Albert J, *et al.* Immediate and deferred epigenomic signatures of in vivo  
836 neuronal activation in mouse hippocampus. *Nat Neurosci* **22**, 1718-1730 (2019).  
837
- 838 41. Marco A, *et al.* Mapping the epigenomic and transcriptomic interplay during memory  
839 formation and recall in the hippocampal engram ensemble. *Nat Neurosci* **23**, 1606-1617  
840 (2020).  
841
- 842 42. McGinnis CS, *et al.* MULTI-seq: sample multiplexing for single-cell RNA sequencing  
843 using lipid-tagged indices. *Nat Methods* **16**, 619-626 (2019).  
844

- 845 43. Kawaguchi Y, Wilson CJ, Augood SJ, Emson PC. Striatal interneurons: chemical,  
846 physiological and morphological characterization. *Trends Neurosci* **18**, 527-535 (1995).  
847
- 848 44. Yuste R, *et al.* A community-based transcriptomics classification and nomenclature of  
849 neocortical cell types. *Nat Neurosci* **23**, 1456-1468 (2020).  
850
- 851 45. Kim H, Berens NC, Ochandarena NE, Philpot BD. Region and Cell Type Distribution of  
852 TCF4 in the Postnatal Mouse Brain. *Front Neuroanat* **14**, 42 (2020).  
853
- 854 46. Cuesta S, Batuecas J, Severin MJ, Funes A, Rosso SB, Pacchioni AM. Role of Wnt/beta-  
855 catenin pathway in the nucleus accumbens in long-term cocaine-induced neuroplasticity:  
856 a possible novel target for addiction treatment. *J Neurochem* **140**, 114-125 (2017).  
857
- 858 47. Dias C, *et al.* beta-catenin mediates stress resilience through Dicer1/microRNA  
859 regulation. *Nature* **516**, 51-55 (2014).  
860
- 861 48. Dehorter N, Ciceri G, Bartolini G, Lim L, del Pino I, Marin O. Tuning of fast-spiking  
862 interneuron properties by an activity-dependent transcriptional switch. *Science* **349**,  
863 1216-1220 (2015).  
864
- 865 49. Pulipparacharuvil S, *et al.* Cocaine regulates MEF2 to control synaptic and behavioral  
866 plasticity. *Neuron* **59**, 621-633 (2008).  
867
- 868 50. Fonseca GJ, *et al.* Diverse motif ensembles specify non-redundant DNA binding  
869 activities of AP-1 family members in macrophages. *Nature communications* **10**, 414  
870 (2019).  
871
- 872 51. Sanz E, Yang L, Su T, Morris DR, McKnight GS, Amieux PS. Cell-type-specific  
873 isolation of ribosome-associated mRNA from complex tissues. *Proc Natl Acad Sci U S A*  
874 **106**, 13939-13944 (2009).  
875
- 876 52. Favuzzi E, *et al.* Activity-Dependent Gating of Parvalbumin Interneuron Function by the  
877 Perineuronal Net Protein Brevican. *Neuron* **95**, 639-655 e610 (2017).  
878
- 879 53. Um JW, *et al.* Calsyntenins function as synaptogenic adhesion molecules in concert with  
880 neurexins. *Cell Rep* **6**, 1096-1109 (2014).  
881
- 882 54. Lipina TV, *et al.* Cognitive Deficits in Calsyntenin-2-deficient Mice Associated with  
883 Reduced GABAergic Transmission. *Neuropsychopharmacology* **41**, 802-810 (2016).  
884
- 885 55. Mardinly AR, *et al.* Sensory experience regulates cortical inhibition by inducing IGF1 in  
886 VIP neurons. *Nature* **531**, 371-375 (2016).  
887
- 888 56. Vierbuchen T, *et al.* AP-1 Transcription Factors and the BAF Complex Mediate Signal-  
889 Dependent Enhancer Selection. *Mol Cell* **68**, 1067-1082 e1012 (2017).  
890

- 891 57. Clemens AW, Wu DY, Moore JR, Christian DL, Zhao G, Gabel HW. MeCP2 Represses  
892 Enhancers through Chromosome Topology-Associated DNA Methylation. *Mol Cell* **77**,  
893 279-293 e278 (2020).  
894
- 895 58. Boxer LD, *et al.* MeCP2 Represses the Rate of Transcriptional Initiation of Highly  
896 Methylated Long Genes. *Mol Cell* **77**, 294-309 e299 (2020).  
897
- 898 59. Linhoff MW, Garg SK, Mandel G. A high-resolution imaging approach to investigate  
899 chromatin architecture in complex tissues. *Cell* **163**, 246-255 (2015).  
900
- 901 60. Ebert DH, *et al.* Activity-dependent phosphorylation of MeCP2 threonine 308 regulates  
902 interaction with NCoR. *Nature* **499**, 341-345 (2013).  
903
- 904 61. Buenrostro JD, *et al.* Single-cell chromatin accessibility reveals principles of regulatory  
905 variation. *Nature* **523**, 486-490 (2015).  
906
- 907 62. Beagrie RA, *et al.* Complex multi-enhancer contacts captured by genome architecture  
908 mapping. *Nature* **543**, 519-524 (2017).  
909
- 910 63. Corces MR, *et al.* An improved ATAC-seq protocol reduces background and enables  
911 interrogation of frozen tissues. *Nat Methods* **14**, 959-962 (2017).  
912  
913
- 914

915 **Acknowledgments:** We thank Xiaoting Wang, Alexias Safi, and Greg Crawford for assistance  
916 with experiments. The Duke University School of Medicine Sequencing and Genomic  
917 Technologies Shared Resource provided sequencing services and the Duke University Mouse  
918 Behavioral and Neuroendocrine Analysis Core Facility provided equipment and support for the  
919 mouse behavioral studies. FANS was performed in the Immunology Unit of the Regional  
920 Biocontainment Laboratory at Duke, which receives support from NIH grant UC6-AI058607.  
921 This work was supported by NIH grants R01DA047115 and R33DA041878 (A.E.W.).

922

923 **Author contributions:** D.A.G. and A.E.W. conceived of and designed the study. D.A.G., M.M.,  
924 F.L., M.F.H., S.A.Y., and L.C.B. acquired and analyzed data. D.A.G. and A.E.W. wrote the  
925 paper with feedback from other authors. All authors read and approved the submitted version of  
926 the study.

927

928 **Competing Interests:** The authors declare no competing interests.

929

930 **Materials and Correspondence:** All correspondence and requests for material should be  
931 directed to Anne West, 311 Research Drive, Bryan Research 301D, Duke University Medical  
932 Center Box 3209, Durham, NC 27710, USA. [west@neuro.duke.edu](mailto:west@neuro.duke.edu), phone 919-681-1909.

933 **Figure Legends**

934 **Figure 1:** INTACT-mediated isolation of PV+ and SST+ GABAergic interneuron nuclei from  
935 mouse NAc. **A)** Schematic of the INTACT Cre-inducible Sun1-GFP transgene system. For each  
936 strain, the protocol yields two fractions: Sun1-GFP+ nuclei (green) immunoprecipitated from the  
937 specific cells expressing the Cre transgene (IP) and an unbound fraction (UF) that contains a  
938 mixture of nuclei from all other cell types present in the homogenate. RNA and chromatin from  
939 each fraction was used for nuclear RNA sequencing (nucRNA-seq) and the detection of Tn5-  
940 transposase accessible regions (ATAC-seq), respectively. **B)** Diagram of the NAc region  
941 bilaterally dissected from individual animals for nuclear isolation. **C)** Representative images of  
942 DAPI-stained nuclei and Sun1GFP-fluorescence in the NAc homogenate (merge), and on beads  
943 after immunoprecipitation (IP). **D-E)** Immunohistochemical overlap of Sun-GFP with  
944 Parvalbumin (PV) immunostaining (D), or *Sst* FISH signal (E), in coronal brain sections through  
945 the NAc of the indicated INTACT transgenic mice. Scale bars, 10 $\mu$ m. **F-I)** NucRNA-seq RNA  
946 expression data from IP and UF fractions of the indicated dual transgenic mice. *Pvalb*-Cre IP,  
947 green; *Pvalb*-Cre UF, purple; *Sst*-Cre IP, red; *Sst*-Cre UF blue; **F, H)** Validation in nucRNA-seq  
948 data of enrichment for cell-type marker genes *Pvalb* (F) and *Sst* (H) in the IP fraction of the  
949 indicated mice shown via TPM, Transcripts per Kilobase Million (TPM), Error bars indicate  
950 SEM. **G, I)** Volcano plots of cell-type enriched genes in *Pvalb*-Cre (**G**) and *Sst*-Cre (**I**) IP each  
951 compared to UF of the same strain in timepoint-combined control-treated mice. Black dots, not  
952 significant; colored dots, \*FDR<0.05. *Pvalb*-Cre n=9, *Sst*-Cre n=7 individual animals. **J, K)**  
953 Representative nucRNA-seq tracks for cell-type marker genes. Y-axis is constant between  
954 matched samples for each gene. Arrows on gene indicate transcript directionality.

955

956

957 **Figure 2: AMPH induces an overlapping program of rapid PRGs in distinct populations of NAc**

958 GABAergic neurons. **A)** Experimental timeline. Mice received saline (Sal) or amphetamine

959 (AMPH, 3mg/kg, i.p.) after 60 min habituation to the open field. Brains were harvested 35 min

960 later for nucRNA-seq. **B)** Summed locomotor activity in the open field 60 min before (Pre) and

961 30 min after (Post) i.p. injection of saline or 3mg/kg AMPH. *Pvalb*-Cre n=5/treatment; *Sst*-Cre

962 n=3/treatment; combined UF n=8/treatment, Error bars indicate SEM. Two-way rmANOVA,

963 *Pvalb*-Cre  $F(1, 11) = 93.18, p < 0.0001$ , Bonferroni post-hoc AMPH Pre vs Post  $p < 0.0001$ ; *Sst*-

964 Cre  $F(1, 9) = 24.91, p = 0.0007$ , Bonferroni post-hoc AMPH Pre vs Post  $p = .0025$ . **C)** Validation

965 of enrichment for cell-type specific marker transcripts (*Pvalb* or *Sst*) in nuclei recovered from

966 each condition. TPM for each gene from Table S2 in the IP is shown normalized to UF TPM,

967 Error bars indicate SEM. **D)** Quantification of NucRNA for the rapid PRG *Fos* in nuclei

968 recovered from each condition from Table S2. \*FDR < 0.1, TPM normalized to SAL condition for

969 each isolation, Error bars indicate SEM. **E-G)** Volcano plots of AMPH-regulated RNA at 30min

970 post-injection in *Pvalb* IP (**E**, green), UF fractions (**F**, purple), or *Sst* IP (**G**, red). Black dots,

971 AMPH vs SAL not significant; colored dots \*FDR < 0.1. Darker colors indicate genes induced by

972 AMPH, lighter colors indicate genes repressed by AMPH. **H)** Venn diagram showing overlap of

973 genes induced 35 min following AMPH in each population of nuclei. Common and cell-type

974 specific induced genes are shown in the table at right. **I)** Representative NucRNA-seq tracks of

975 PRGs *Fosl2*, *Nr4a2*, and *Egr3* in each population of nuclei 35 min after AMPH administration.

976

977 **Figure 3: Cell-type specific programs of gene expression regulated 3 hrs after AMPH**

978 administration in different populations of NAc GABAergic neurons. **A)** Experimental timeline.



979 Mice received an injection of saline (Sal) or amphetamine (AMPH, 3mg/kg, i.p.) after 60 min  
980 habituation in the open field. Brains were harvested 180 min (3 hr) later for nucRNA-seq. **B)**  
981 Locomotor activity 60 min before (pre) and 180 min after (post) i.p. injection of saline (light  
982 green) or 3mg/kg AMPH (dark green). *Pvalb*-Cre n=4/treatment condition; *Sst*-Cre  
983 n=4/treatment condition; Combined UF n=8/treatment condition; Two-way rmANOVA, *Pvalb*-  
984 Cre F (1, 10) = 33.43, p=0.0002, Bonferroni post-hoc AMPH Pre vs Post p<0.0001; *Sst*-Cre F (1,  
985 10) = 17.77, p=0.0018), Bonferroni post-hoc AMPH Pre vs Post p=0.0008, Error bars indicate  
986 SEM. **C)** Validation of enrichment for cell-type specific marker transcript expression in nuclei  
987 recovered from each condition. TPM normalized to UF for each isolation. *Pvalb*-Cre IP  
988 n=4/condition; *Sst*-Cre IP n=4/condition; Combined UF n=8/condition, Error bars indicate SEM.  
989 **D)** Example Tracks of RNA for the delayed primary-response gene *Bdnf* in nuclei from each of  
990 the conditions. TPM normalized to SAL condition for each isolation. *Pvalb*-Cre IP n=4/treatment  
991 condition; *Sst*-Cre IP n=4/treatment condition; Combined UF n=8/treatment condition;  
992 \*FDR<0.1. Y-axis proportionally adjusted for differential depth in SST Sal/AMPH resulting  
993 from PE sequencing. **E-G)** Volcano plots of AMPH-regulated gene expression at 180 min post-  
994 injection in *Pvalb*-Cre IP (E, green) *Sst*-Cre IP (G, red) or the combined UF fractions (F, purple).  
995 Black dots, SAL vs AMPH not significant; colored dots, using DESeq2 FDR<0.1. Darker colors  
996 indicate genes induced by AMPH; lighter colors indicate genes repressed by AMPH at 3 Hr post-  
997 administration. *Pvalb*-Cre IP n=4/treatment condition; *Sst*-Cre IP n=4/treatment condition;  
998 Combined UF n=8/treatment condition; \*FDR<0.1. **H)** Venn diagram showing overlap of genes  
999 induced 3 Hr following AMPH in each population of nuclei. **I)** Representative nucRNA-seq  
1000 track for example cell-type specific AMPH-induced gene *Acan*. **J-L)** Cell-type specific induction  
1001 of *Cntnap4* by AMPH in *Pvalb*<sup>+</sup> neurons of the NAc. **J)** nucRNA-seq quantification of *Cntnap4*

1002 TPM in *Pvalb*-Cre IP n=4/treatment condition; *Pvalb*-Cre UF n=4/treatment condition;  
1003 \*FDR<0.1 for +/- AMPH treatment. K) smFISH for *Cntnap4* and *Pvalb* in NAc. Scale bar =  
1004 10µm. L) Quantification of *Cntnap4* smFISH in *Pvalb*<sup>+</sup> and *Pvalb*<sup>-</sup> nuclei; Two-way ANOVA, F  
1005 (1, 332) = 9.093, p=0.0028, Bonferroni post-hoc *Pvalb*<sup>+</sup> Sal vs AMPH p=.0017.  
1006  
1007 **Figure 4: Cell-type specific and post-AMPH chromatin accessibility in NAc neurons A-B)** MA  
1008 plots of cell-type specific differential chromatin accessibility in each population of isolated  
1009 nuclei using DeSeq2 \*FDR<0.05. *Pvalb*-Cre IP vs *Pvalb*-Cre UF, Green points indicate regions  
1010 significantly differentially accessible in PV<sup>+</sup> nuclei; Purple points indicate regions significantly  
1011 differentially accessible in *Pvalb*-Cre UF nuclei (A); *Sst*-Cre IP, red *Sst*-Cre IP vs *Sst*-Cre UF,  
1012 blue points indicate regions significantly differentially accessible in SST<sup>+</sup> nuclei; Light blue  
1013 points indicate regions significantly differentially accessible in *Sst*-Cre UF nuclei (B). C)  
1014 Example tracks of cell-type specific accessible regions in the vicinity of cell-type marker genes  
1015 in each isolated cell fraction. *Gapdh* track included as a commonly accessible reference gene in  
1016 all cell types. Y-axis is consistent across all tracks for each gene. D) Pie chart depicting relative  
1017 genomic location (Promoter, Gene body/Intragenic, Downstream, or Distal Intergenic) of cell  
1018 type specific (*Pvalb*-Cre IP, *Sst*-Cre IP, Combined UF) differentially accessible chromatin  
1019 regions enriched in each fraction. E) Experimental timeline. Mice received an injection of saline  
1020 (Sal) or amphetamine (AMPH, 3mg/kg, i.p.) after 60 min habituation in the open field. Brains  
1021 were harvested 60 min later for ATAC-seq. F) MA plots of AMPH-induced differential  
1022 chromatin accessibility in each population of isolated nuclei 60 min post administration using  
1023 DeSeq2 \*FDR<0.05; *Pvalb*-Cre IP n=4/treatment conditions *Pvalb*-Cre UF n=4/treatment  
1024 condition. G) Representative genomic tracks of nuc-RNAseq and ATAC-seq from Sal control

1025 and AMPH-treated samples on and in the vicinity of the *Fos* gene. nucRNA-seq tracks show  
1026 AMPH-induced expression of *Fos* at 35min in both PV+ and UF cell populations. ATAC-seq  
1027 depicts chromatin accessibility at the *Fos* gene and at its five known enhancer regions outlined in  
1028 blue.

1029

1030 **Figure 5: Single nucleus RNA-seq reveals molecular heterogeneity of PV+ interneurons in the**  
1031 **NAc.** **A)** Seven-cluster UMAP projection of snRNAseq data from *Pvalb*-Cre nuclei isolated with  
1032 FANS; n= 787 nuclei after normalization, scaling, and filtration based on detectable  
1033 polyadenylated *Pvalb* transcripts. **B)** Violin plot of *Pvalb* log-normalized expression levels in  
1034 nuclei across the 7 UMAP projection clusters. **C)** Violin plots of log-normalized expression  
1035 levels of *Adarb2* and *Gpc5* in nuclei across the 7 UMAP projection clusters. **D)** Fluorescent in  
1036 situ hybridization using probes against *Pvalb* and *Adarb2* in the mouse NAc exhibiting partial  
1037 colocalization of *Pvalb* and *Adarb2* RNA in single cells; Yellow circles indicate *Pvalb/Adarb2*  
1038 co-positive cells, white circles indicate *Pvalb+/Adarb2-* cells. **E)** Violin plots of log-normalized  
1039 expression levels of *Pvalb*, *Fos*, and *Npas4* in nuclei confirmed positive for Multi-seq LMO 5  
1040 (top, SAL treated n=60) or LMO6 (bottom, AMPH-treated, n=187). **G)** Feature plots depicting  
1041 nuclei with detectable transcripts of various PRGs across the 7 UMAP projection clusters. **H)**  
1042 Violin plot of log-normalized expression levels of *Pvalb*, *Adarb2*, and *Gpc5* in nuclei confirmed  
1043 positive for Multi-seq LMO 6 (AMPH) in two-cluster UMAP projection of snRNA-seq data  
1044 from *Pvalb*-Cre nuclei. 0, *Adarb2-/Gpc5-*; 1, *Adarb2+/Gpc5+*. **I)** Violin plot of log-normalized  
1045 expression levels of various PRGs in two-cluster UMAP projection of snRNA-seq data from  
1046 *Pvalb*-Cre nuclei confirmed positive for Multi-seq LMO 6 (AMPH) clustered as in **H**.

1047

1048 **Figure 6: Motif analysis of differentially accessible chromatin near AMPH-regulated genes**  
1049 **suggests transcriptional mechanisms of gene regulation in NAc neurons.** **A)** Representative  
1050 genomic tracks of nuc-RNAseq and ATAC-seq from Sal control only (ATAC) or Sal and  
1051 AMPH-treated samples (nuc-RNAseq) in the vicinity of the *Cntnap4* gene. nucRNA-seq tracks  
1052 show significant AMPH-induction of *Cntnap4* RNA specific to the PV+ cell population. ATAC-  
1053 seq depicts regions within the *Cntnap4* gene significantly differentially accessible within PV+  
1054 interneurons (*Pvalb*-Cre IP) outlined in blue. **B-D)** Enriched Transcription Factor Motifs as  
1055 determined by HOMER at cell-type-unique differentially accessible inter- (+/- 50Kb) and  
1056 intragenic chromatin regions at genes induced by AMPH at 3Hrs in each cell fraction, \* $q < 0.05$ ;  
1057 Enriched motifs are plotted against log<sub>2</sub>FC enrichment at baseline of cognate RNA transcript in  
1058 each isolated cell type or UF; *Pvalb*-Cre IP vs UF (**B**), *Sst*-Cre IP vs UF (**C**), Combined UF vs  
1059 Combined IP (*Pvalb*-Cre+*Sst*-Cre IP)(**D**).

1060

1061 **Figure 7: Gene dysregulation in NAc PV+ neurons of MeCP2 Ser421Ala knockin mice.** **A)**  
1062 Depiction of *Pvalb*-2A-Cre-dependent HA tagging to Rpl22 for cell-type specific (PV+)  
1063 isolation of actively translating mRNA. **B)** IHC depicting specificity of HA tag expression with  
1064 PV protein. **C)** Representative genomic tracks at the *Pvalb* gene of WT and S421 KI IP and Input  
1065 fractions demonstrating significant enrichment of *Pvalb* RNA in the IP conditions. *Gapdh* gene  
1066 track included as a commonly expressed reference gene in all fractions. Y-axis is consistent  
1067 across all tracks for each gene. **D)** Venn diagram of overlapping, cell-type specific basal gene  
1068 enrichment in PV+ cells as measured by nucRNA-seq (dark green) and Ribotag (light green) vs  
1069 surrounding cells (*Pvalb*-Cre IP vs UF nucRNAseq, WT IP vs WT Input Ribotag). **E)** Volcano  
1070 Plot of differentially dysregulated genes between MeCP2 WT vs KI immunoprecipitated

1071 fractions (IP) in naïve mice; Black dots, not significant; colored dots, FDR<0.1; n=15/genotype,  
1072 pooled into 3 replicates of 5 mice each. **F)** Representative genomic tracks at the nucRNA-seq  
1073 AMPH-induced genes *Acan* and *Cntnap4* of WT and Ser421Ala (S421A) KI IP and Input  
1074 fractions. **G)** Representative image of FISH targeting *Pvalb*, *Ppp1r1b*, and *Cntnap4* mRNA. **H)**  
1075 smFISH quantification of *Cntnap4* transcript number in *Pvalb*<sup>+</sup> or *Ppp1r1b*<sup>+</sup> nuclei (n=34 WT  
1076 PV, 37 KI PV<sup>+</sup> nuclei, 24 WT SPN nuclei, 24 KI SPN nuclei); Two-way ANOVA, F (1, 117) =  
1077 8.943, \*p=0.0034, Bonferroni post-hoc *Pvalb* WT vs S421A p=.0226. **I)** Representative image  
1078 of FISH targeting *Pvalb* and *Acan* mRNA. **J)** smFISH quantification of *Acan* transcript number  
1079 in *Pvalb*<sup>+</sup> or *Ppp1r1b*<sup>+</sup> nuclei (n=21 WT *Pvalb*<sup>+</sup>, 20 KI *Pvalb*<sup>+</sup> nuclei, 37 WT *Ppp1r1b*<sup>+</sup>  
1080 nuclei, 28 KI *Ppp1r1b*<sup>+</sup> nuclei) Two-way ANOVA, F (1, 102) = 13.47, \*p=0.0004, Bonferroni  
1081 post-hoc *Pvalb*<sup>+</sup> WT vs S421A p<.0001.

1082

## Figure 1

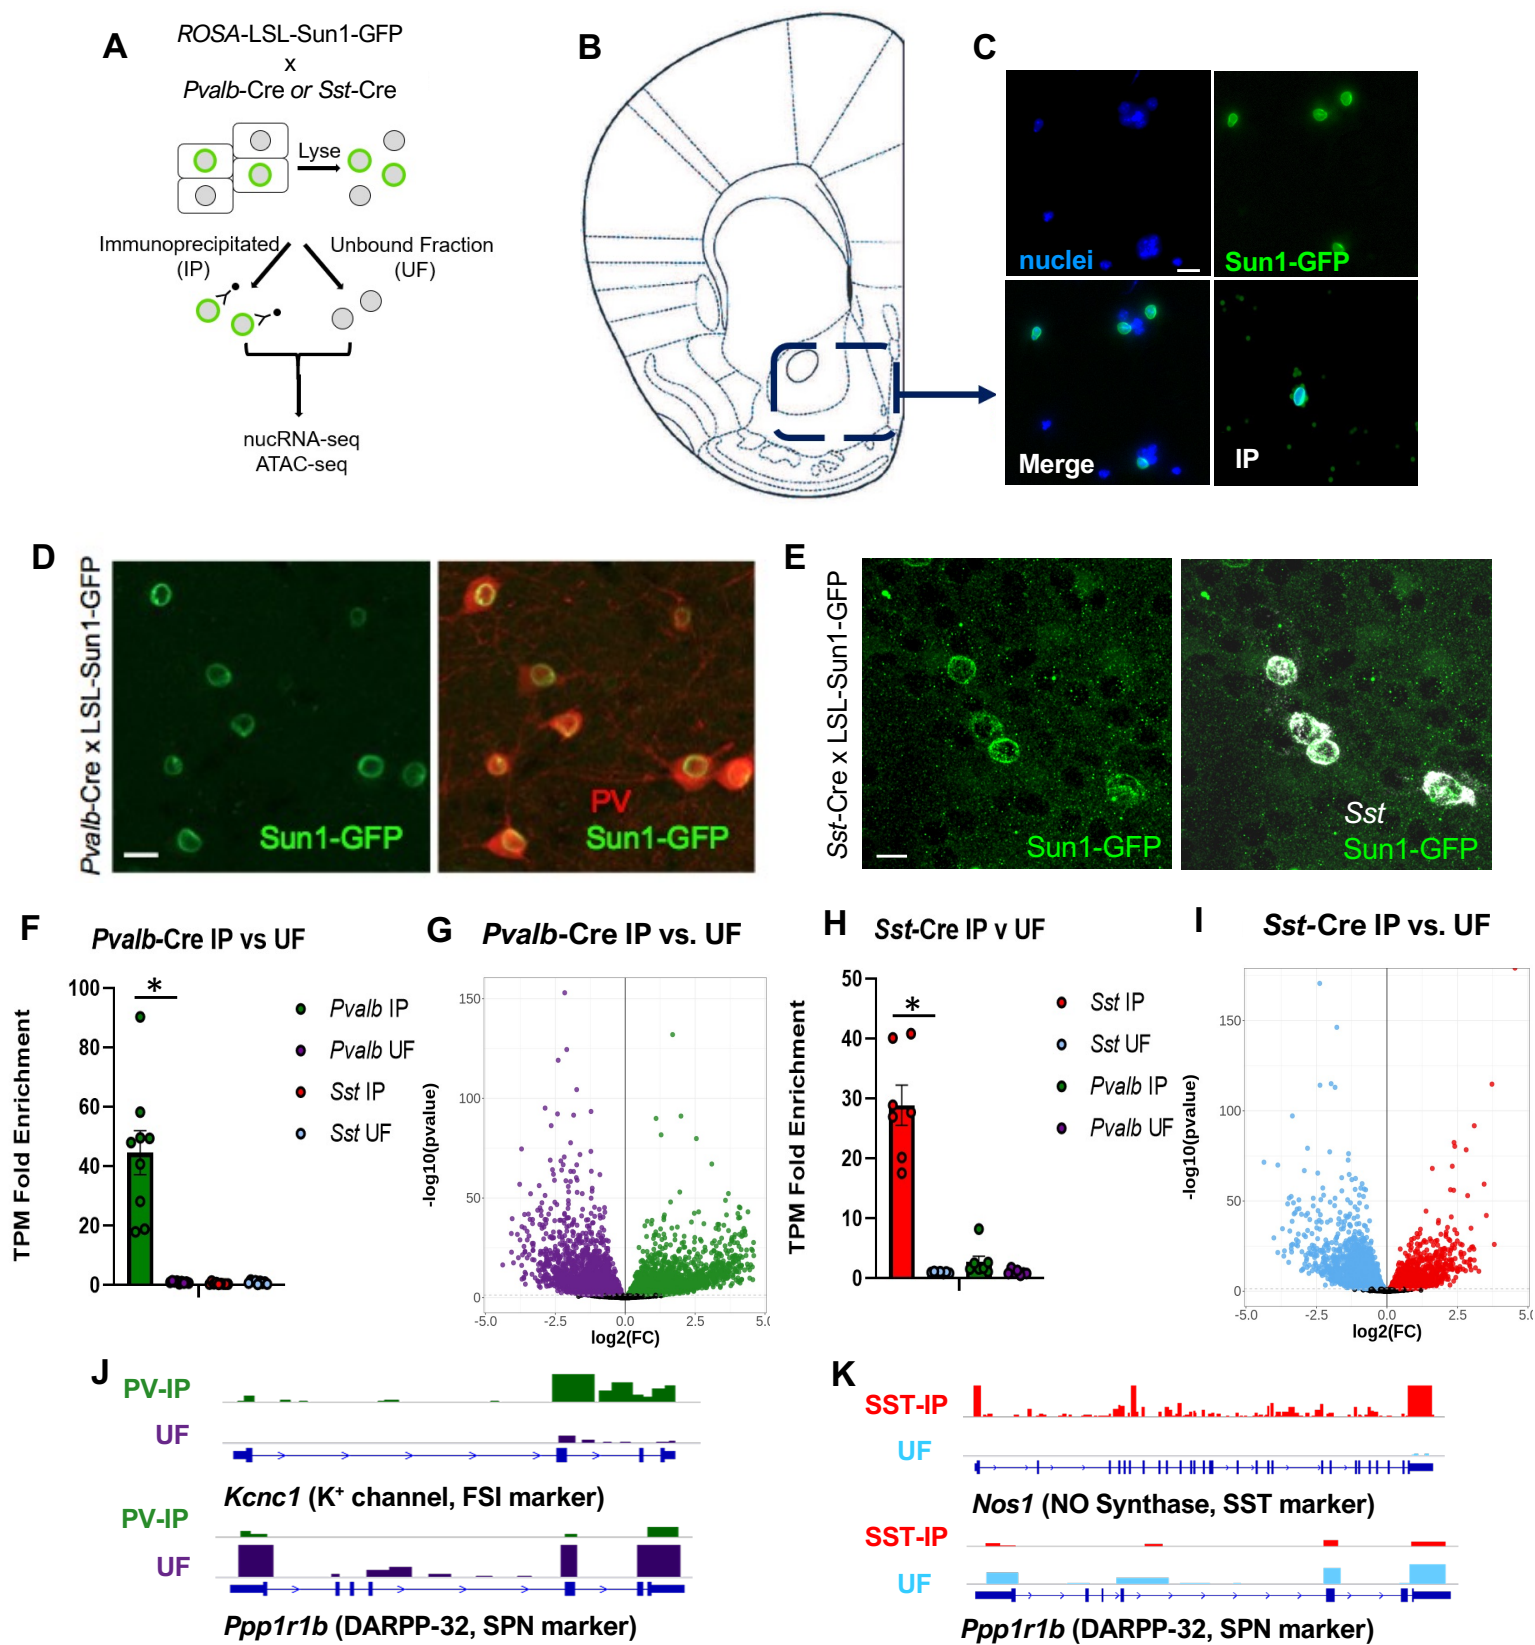

**Figure 1: INTACT-mediated isolation of PV+ and SST+ GABAergic interneuron nuclei from mouse NAc.** **A)** Schematic of the INTACT Cre-inducible Sun1-GFP transgene system. For each strain, the protocol yields two fractions: Sun1-GFP+ nuclei (green) immunoprecipitated from the specific cells expressing the Cre transgene (IP) and an unbound fraction (UF) that contains a mixture of nuclei from all other cell types present in the homogenate. RNA and chromatin from each fraction was used for nuclear RNA sequencing (nucRNA-seq) and the detection of Tn5-transposase accessible regions (ATAC-seq), respectively. **B)** Diagram of the NAc region bilaterally dissected from individual animals for nuclear isolation. **C)** Representative images of DAPI-stained nuclei and Sun1GFP-fluorescence in the NAc homogenate (merge), and on beads after immunoprecipitation (IP). **D-E)** Immunohistochemical overlap of Sun-GFP with Parvalbumin (PV) immunostaining (D), or *Sst* FISH signal (E), in coronal brain sections through the NAc of the indicated INTACT transgenic mice. Scale bars, 10 $\mu$ m. **F-I)** NucRNA-seq RNA expression data from IP and UF fractions of the indicated dual transgenic mice. *Pvalb*-Cre IP, green; *Pvalb*-Cre UF, purple; *Sst*-Cre IP, red; *Sst*-Cre UF blue; **F, H)** Validation in nucRNA-seq data of enrichment for cell-type marker genes *Pvalb* (F) and *Sst* (H) in the IP fraction of the indicated mice shown via TPM, Transcripts per Kilobase Million (TPM), Error bars indicate SEM. **G, I)** Volcano plots of cell-type enriched genes in *Pvalb*-Cre (**G**) and *Sst*-Cre (**I**) IP each compared to UF of the same strain in timepoint-combined control-treated mice. Black dots, not significant; colored dots, \*FDR<0.05. *Pvalb*-Cre n=9, *Sst*-Cre n=7 individual animals. **J, K)** Representative nucRNA-seq tracks for cell-type marker genes. Y-axis is constant between matched samples for each gene. Arrows on gene indicate transcript directionality.

## Figure 2

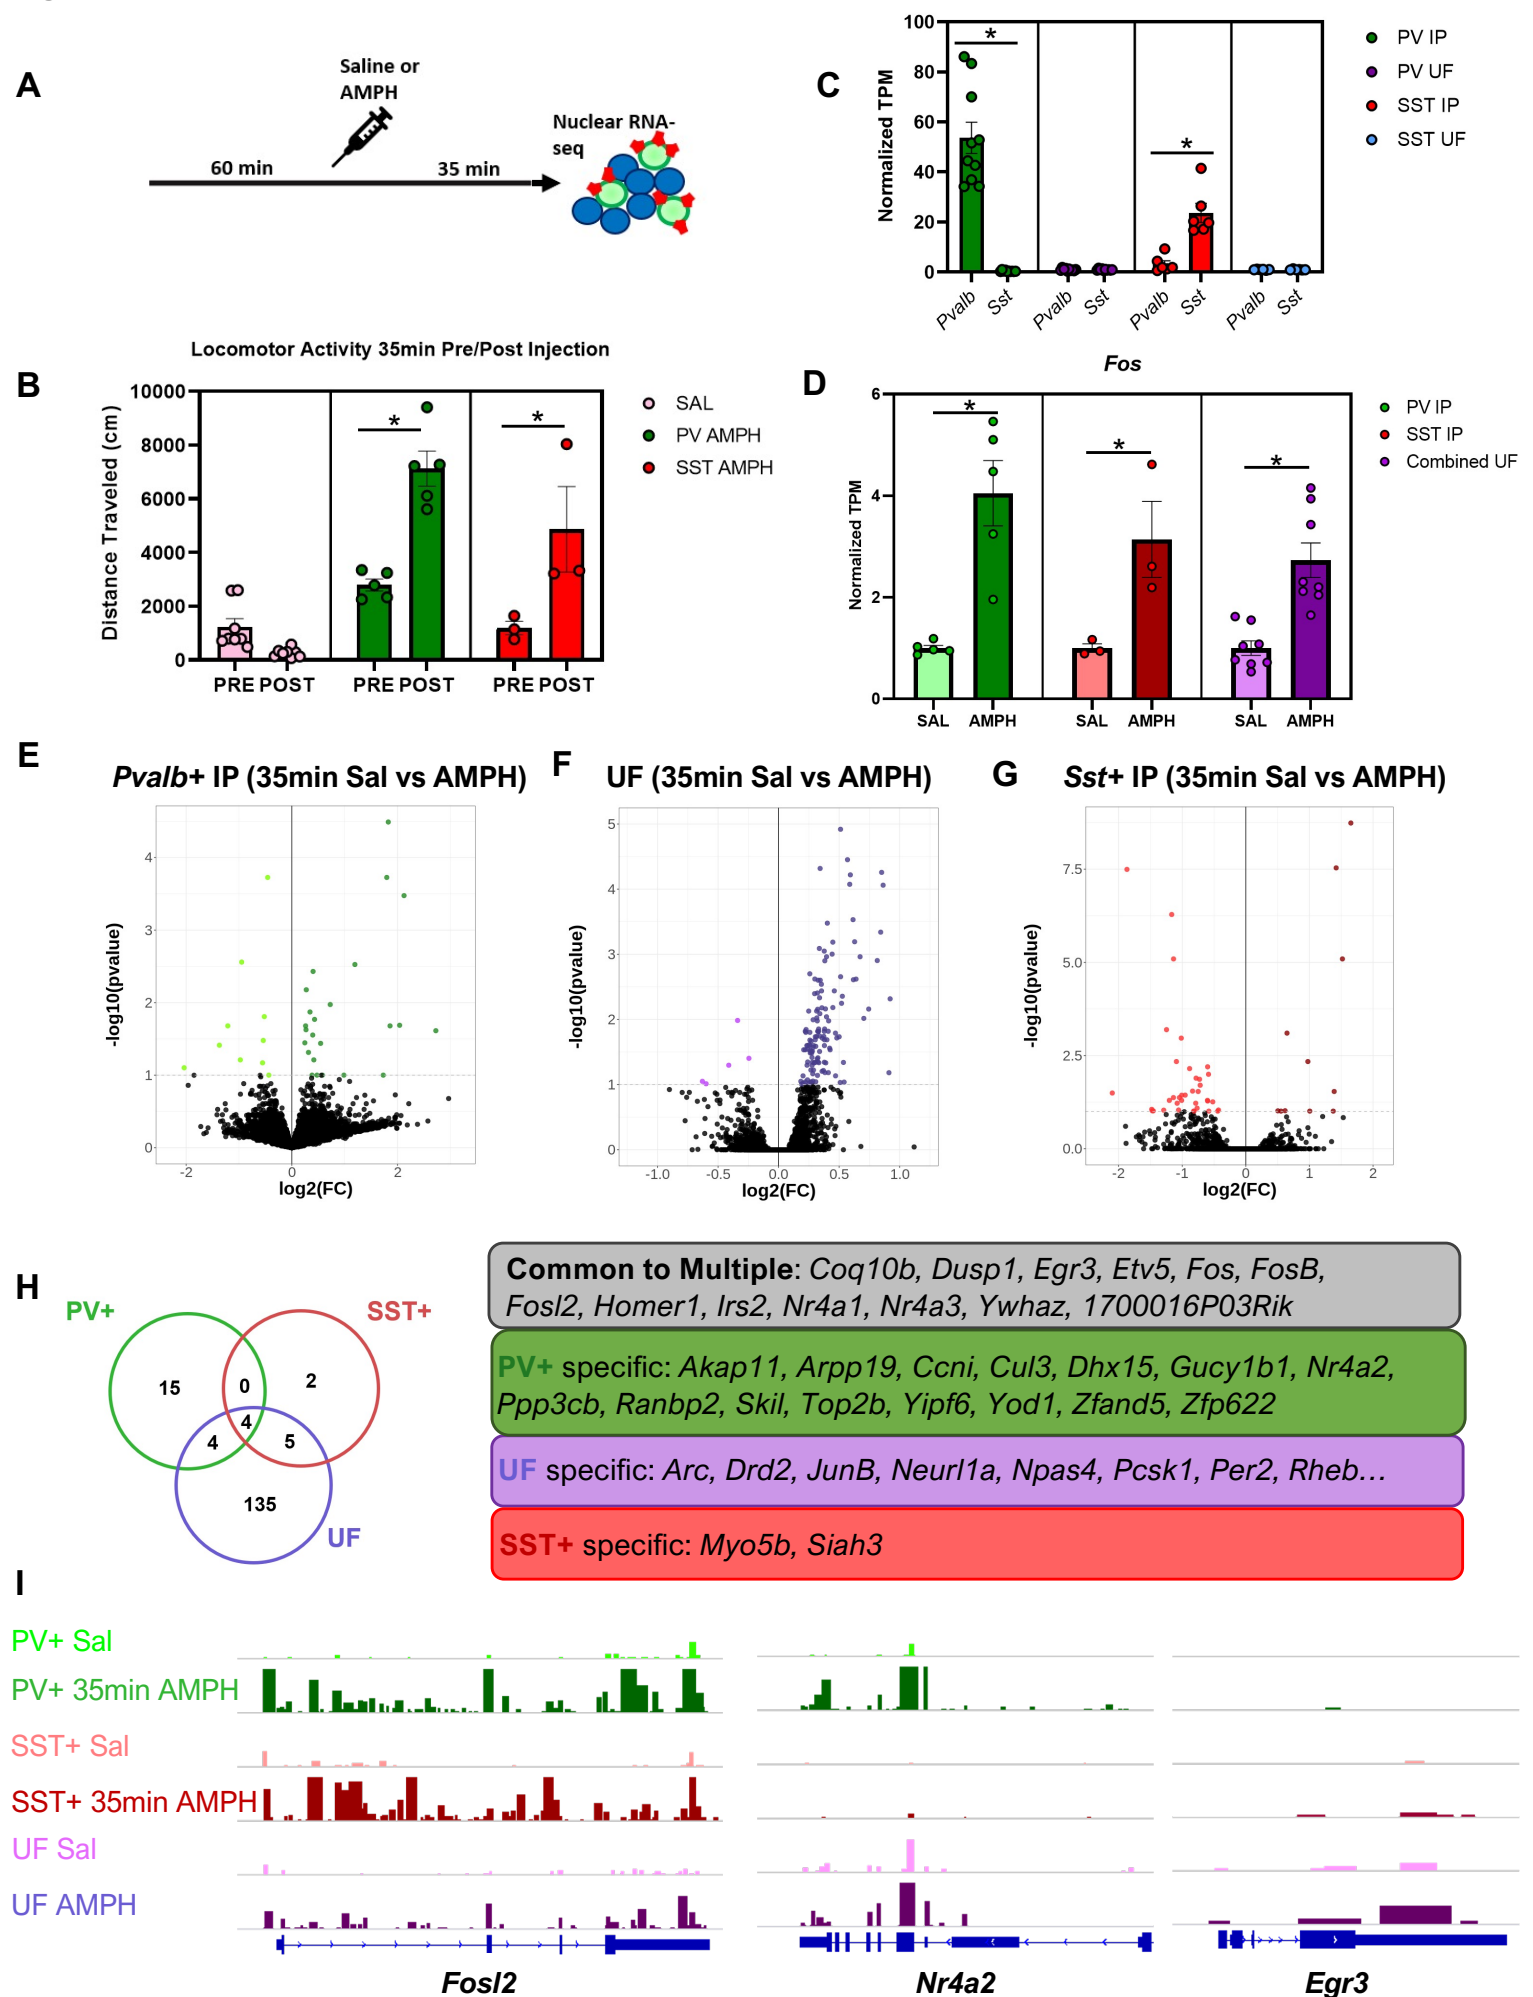



**Figure 2: AMPH induces an overlapping program of rapid PRGs in distinct populations of NAc GABAergic neurons.** **A)** Experimental timeline. Mice received saline (Sal) or amphetamine (AMPH, 3mg/kg, i.p.) after 60 min habituation to the open field. Brains were harvested 35 min later for nucRNA-seq. **B)** Summed locomotor activity in the open field 60 min before (Pre) and 30 min after (Post) i.p. injection of saline or 3mg/kg AMPH. *Pvalb*-Cre n=5/treatment; *Sst*-Cre n=3/treatment; combined UF n=8/treatment, Error bars indicate SEM. Two-way rmANOVA, *Pvalb*-Cre F (1, 11) = 93.18, p<0.0001, Bonferroni post-hoc AMPH Pre vs Post p<0.0001; *Sst*-Cre F (1, 9) = 24.91, p=0.0007, Bonferroni post-hoc AMPH Pre vs Post p=.0025. **C)** Validation of enrichment for cell-type specific marker transcripts (*Pvalb* or *Sst*) in nuclei recovered from each condition. TPM for each gene from Table S2 in the IP is shown normalized to UF TPM, Error bars indicate SEM. **D)** Quantification of NucRNA for the rapid PRG *Fos* in nuclei recovered from each condition from Table S2. \*FDR<0.1, TPM normalized to SAL condition for each isolation, Error bars indicate SEM. **E-G)** Volcano plots of AMPH-regulated RNA at 30min post-injection in *Pvalb* IP (**E**, green), UF fractions (**F**, purple), or *Sst* IP (**G**, red). Black dots, AMPH vs SAL not significant; colored dots \*FDR<0.1. Darker colors indicate genes induced by AMPH, lighter colors indicate genes repressed by AMPH. **H)** Venn diagram showing overlap of genes induced 35 min following AMPH in each population of nuclei. Common and cell-type specific induced genes are shown in the table at right. **I)** Representative NucRNA-seq tracks of PRGs *Fosl2*, *Nr4a2*, and *Egr3* in each population of nuclei 35 min after AMPH administration.

### Figure 3

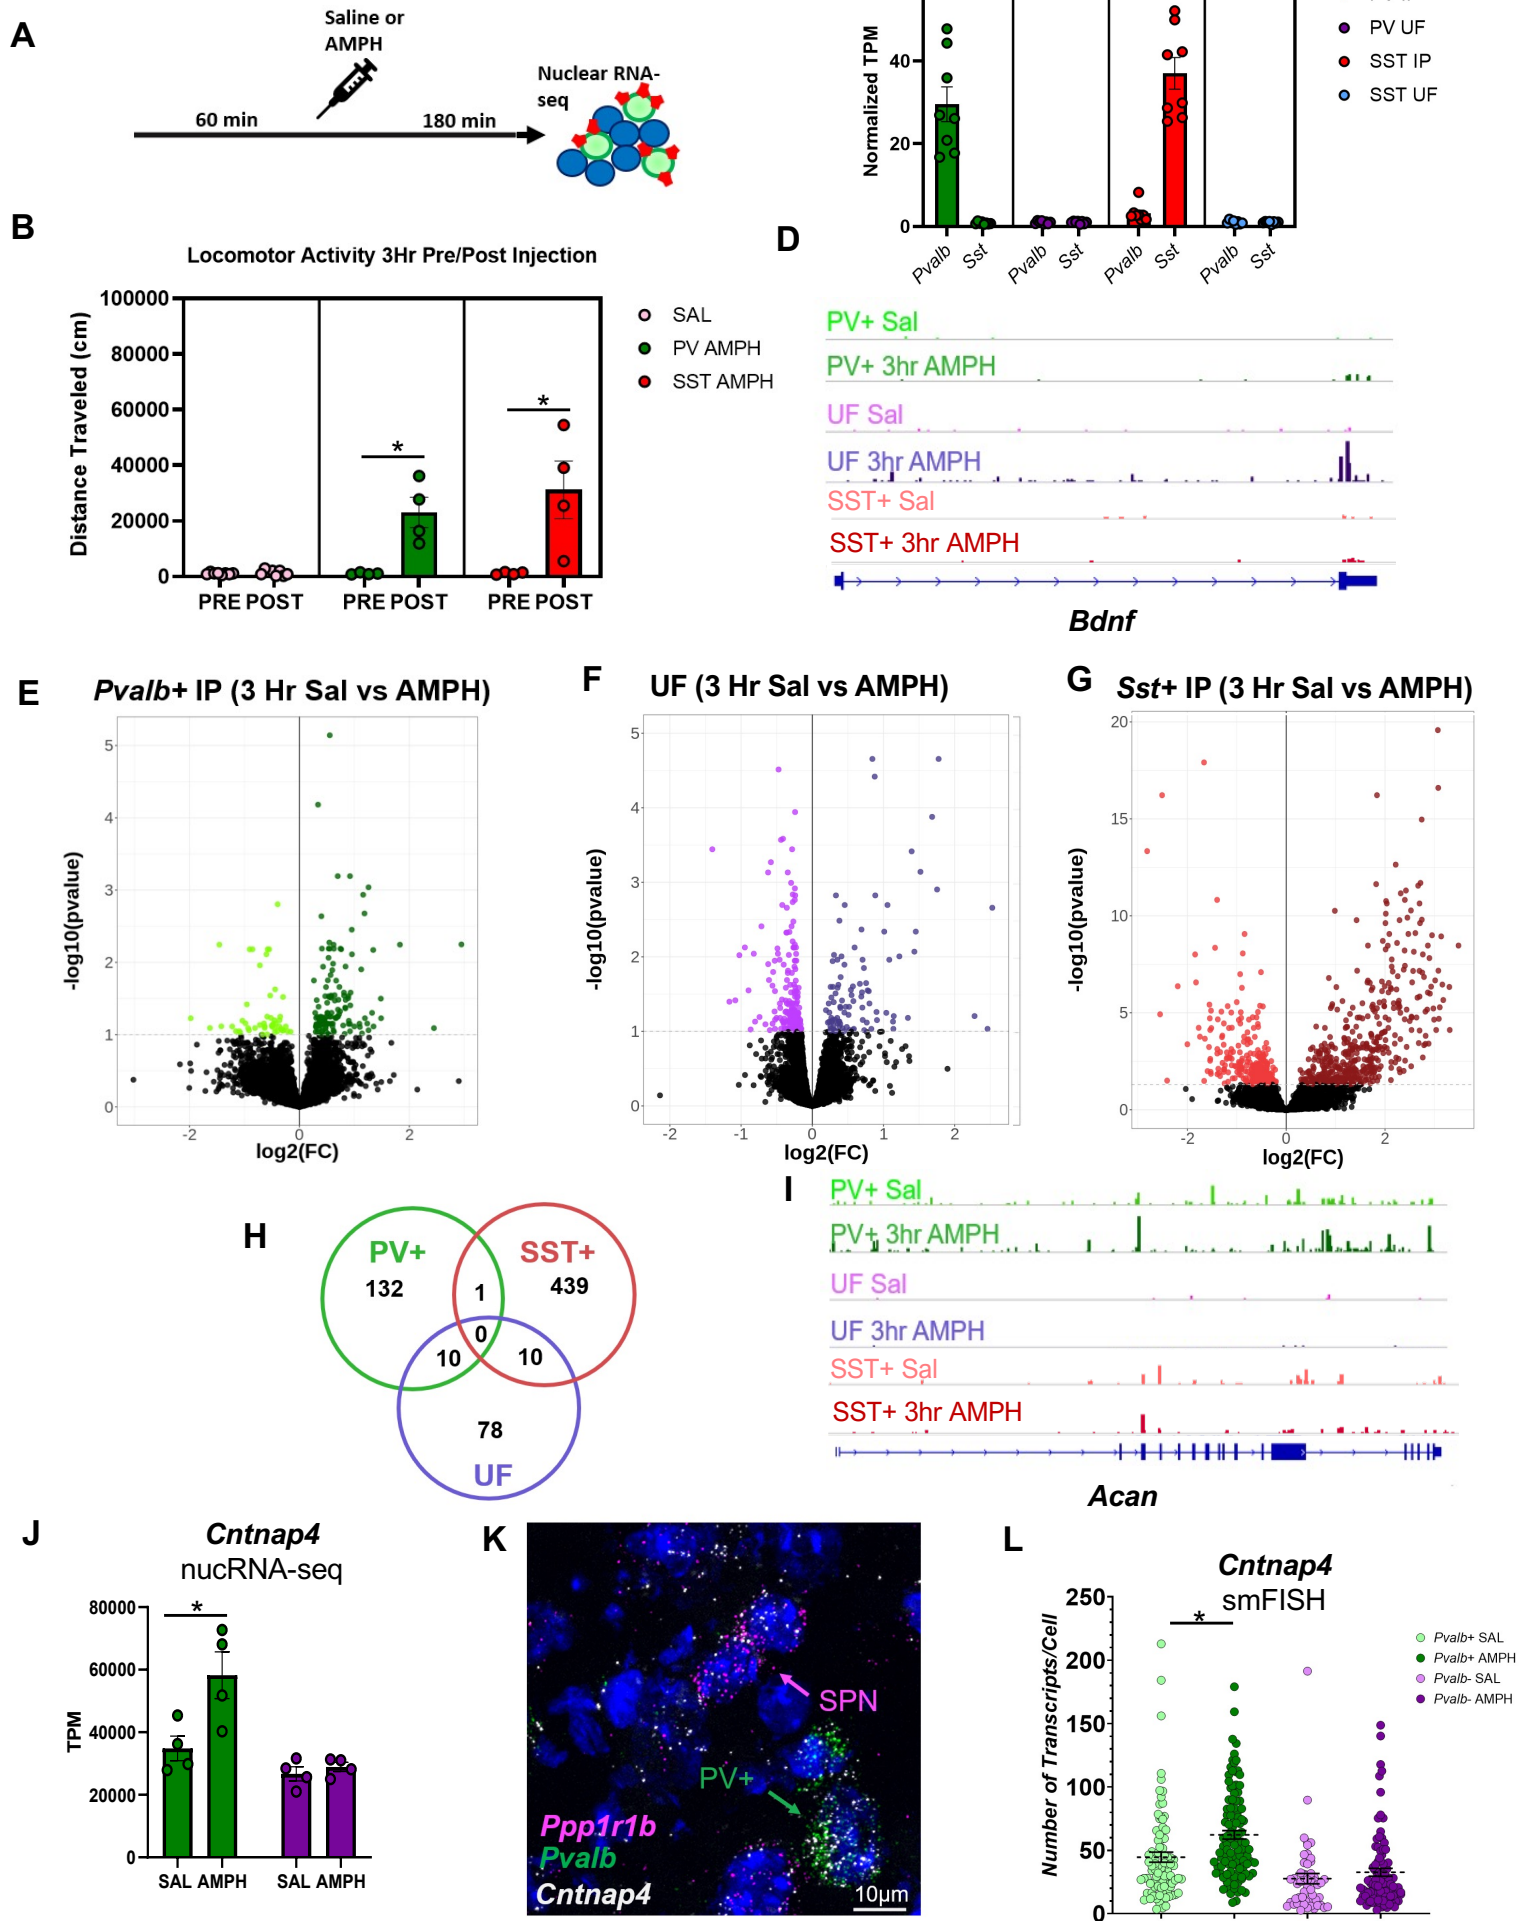

**Figure 3: Cell-type specific programs of gene expression regulated 3 hrs after AMPH administration in different populations of NAc GABAergic neurons. A)** Experimental timeline. Mice received an injection of saline (Sal) or amphetamine (AMPH, 3mg/kg, i.p.) after 60 min habituation in the open field. Brains were harvested 180 min (3 hr) later for nucRNA-seq. **B)** Locomotor activity 60 min before (pre) and 180 min after (post) i.p. injection of saline (light green) or 3mg/kg AMPH (dark green). *Pvalb*-Cre n=4/treatment condition; *Sst*-Cre n=4/treatment condition; Combined UF n=8/treatment condition; Two-way rmANOVA, *Pvalb*-Cre F (1, 10) = 33.43, p=0.0002, Bonferroni post-hoc AMPH Pre vs Post p<0.0001; *Sst*-Cre F (1, 10) = 17.77, p=0.0018, Bonferroni post-hoc AMPH Pre vs Post p=0.0008, Error bars indicate SEM. **C)** Validation of enrichment for cell-type specific marker transcript expression in nuclei recovered from each condition. TPM normalized to UF for each isolation. *Pvalb*-Cre IP n=4/condition; *Sst*-Cre IP n=4/condition; Combined UF n=8/condition, Error bars indicate SEM. **D)** Example Tracks of RNA for the delayed primary-response gene *Bdnf* in nuclei from each of the conditions. TPM normalized to SAL condition for each isolation. *Pvalb*-Cre IP n=4/treatment condition; *Sst*-Cre IP n=4/treatment condition; Combined UF n=8/treatment condition; \*FDR<0.1. Y-axis proportionally adjusted for differential depth in SST Sal/AMPH resulting from PE sequencing. **E-G)** Volcano plots of AMPH-regulated gene expression at 180 min post-injection in *Pvalb*-Cre IP (E, green) *Sst*-Cre IP (G, red) or the combined UF fractions (F, purple). Black dots, SAL vs AMPH not significant; colored dots, using DESeq2 FDR<0.1. Darker colors indicate genes induced by AMPH; lighter colors indicate genes repressed by AMPH at 3 Hr post-administration. *Pvalb*-Cre IP n=4/treatment condition; *Sst*-Cre IP n=4/treatment condition; Combined UF n=8/treatment condition; \*FDR<0.1. **H)** Venn diagram showing overlap of genes induced 3 Hr following AMPH in each population of nuclei. **I)** Representative nucRNA-seq track for example cell-type specific AMPH-induced gene *Acan*. **J-L)** Cell-type specific induction of *Cntnap4* by AMPH in *Pvalb*<sup>+</sup> neurons of the NAc. J) nucRNA-seq quantification of *Cntnap4* TPM in *Pvalb*-Cre IP n=4/treatment condition; *Pvalb*-Cre UF n=4/treatment condition; \*FDR<0.1 for +/- AMPH treatment. K) smFISH for *Cntnap4* and *Pvalb* in NAc. Scale bar = 10µm. L) Quantification of *Cntnap4* smFISH in *Pvalb*<sup>+</sup> and *Pvalb*<sup>-</sup> nuclei; Two-way ANOVA, F (1, 332) = 9.093, p=0.0028, Bonferroni post-hoc *Pvalb*<sup>+</sup> Sal vs AMPH p=.0017.

## Figure 4

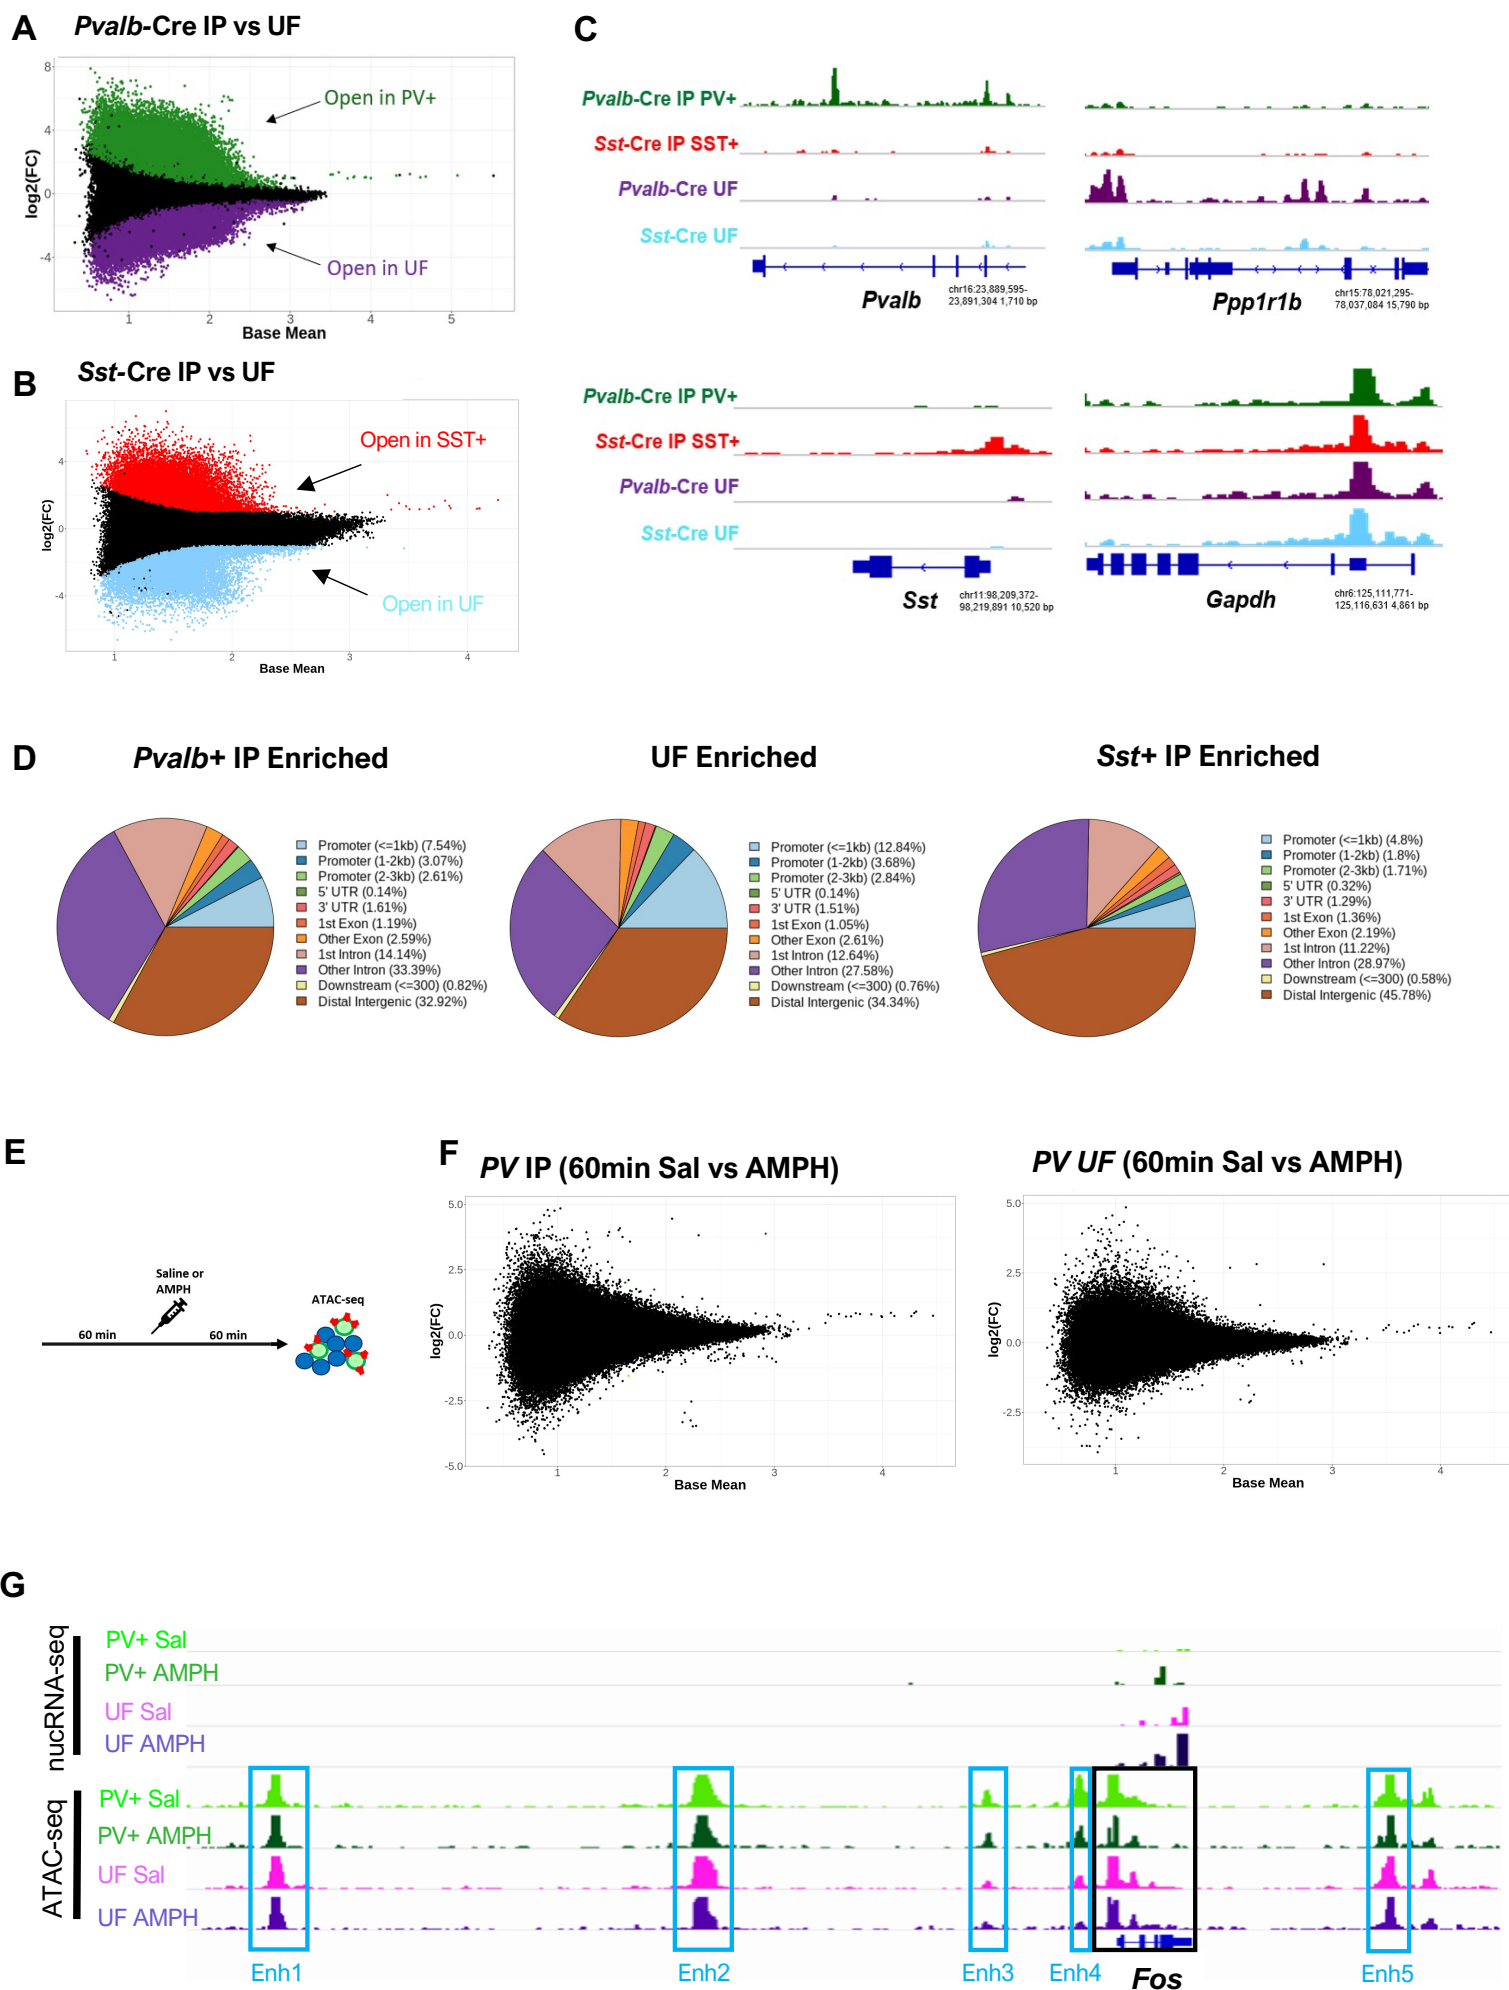

**Figure 4: Cell-type specific and post-AMPH chromatin accessibility in NAc neurons** **A-B)** MA plots of cell-type specific differential chromatin accessibility in each population of isolated nuclei using DeSeq2 \*FDR<0.05. *Pvalb*-Cre IP vs *Pvalb*-Cre UF, Green points indicate regions significantly differentially accessible in PV+ nuclei; Purple points indicate regions significantly differentially accessible in *Pvalb*-Cre UF nuclei (A); *Sst*-Cre IP, red *Sst*-Cre IP vs *Sst*-Cre UF, blue points indicate regions significantly differentially accessible in SST+ nuclei; Light blue points indicate regions significantly differentially accessible in *Sst*-Cre UF nuclei (B). **C)** Example tracks of cell-type specific accessible regions in the vicinity of cell-type marker genes in each isolated cell fraction. *Gapdh* track included as a commonly accessible reference gene in all cell types. Y-axis is consistent across all tracks for each gene. **D)** Pie chart depicting relative genomic location (Promoter, Gene body/Intragenic, Downstream, or Distal Intergenic) of cell type specific (*Pvalb*-Cre IP, *Sst*-Cre IP, Combined UF) differentially accessible chromatin regions enriched in each fraction. **E)** Experimental timeline. Mice received an injection of saline (Sal) or amphetamine (AMPH, 3mg/kg, i.p.) after 60 min habituation in the open field. Brains were harvested 60 min later for ATAC-seq. **F)** MA plots of AMPH-induced differential chromatin accessibility in each population of isolated nuclei 60 min post administration using DeSeq2 \*FDR<0.05; *Pvalb*-Cre IP n=4/treatment conditions *Pvalb*-Cre UF n=4/treatment condition. **G)** Representative genomic tracks of nuc-RNAseq and ATAC-seq from Sal control and AMPH-treated samples on and in the vicinity of the *Fos* gene. nucRNA-seq tracks show AMPH-induced expression of *Fos* at 35min in both PV+ and UF cell populations. ATAC-seq depicts chromatin accessibility at the *Fos* gene and at its five known enhancer regions outlined in blue.

## Figure 5

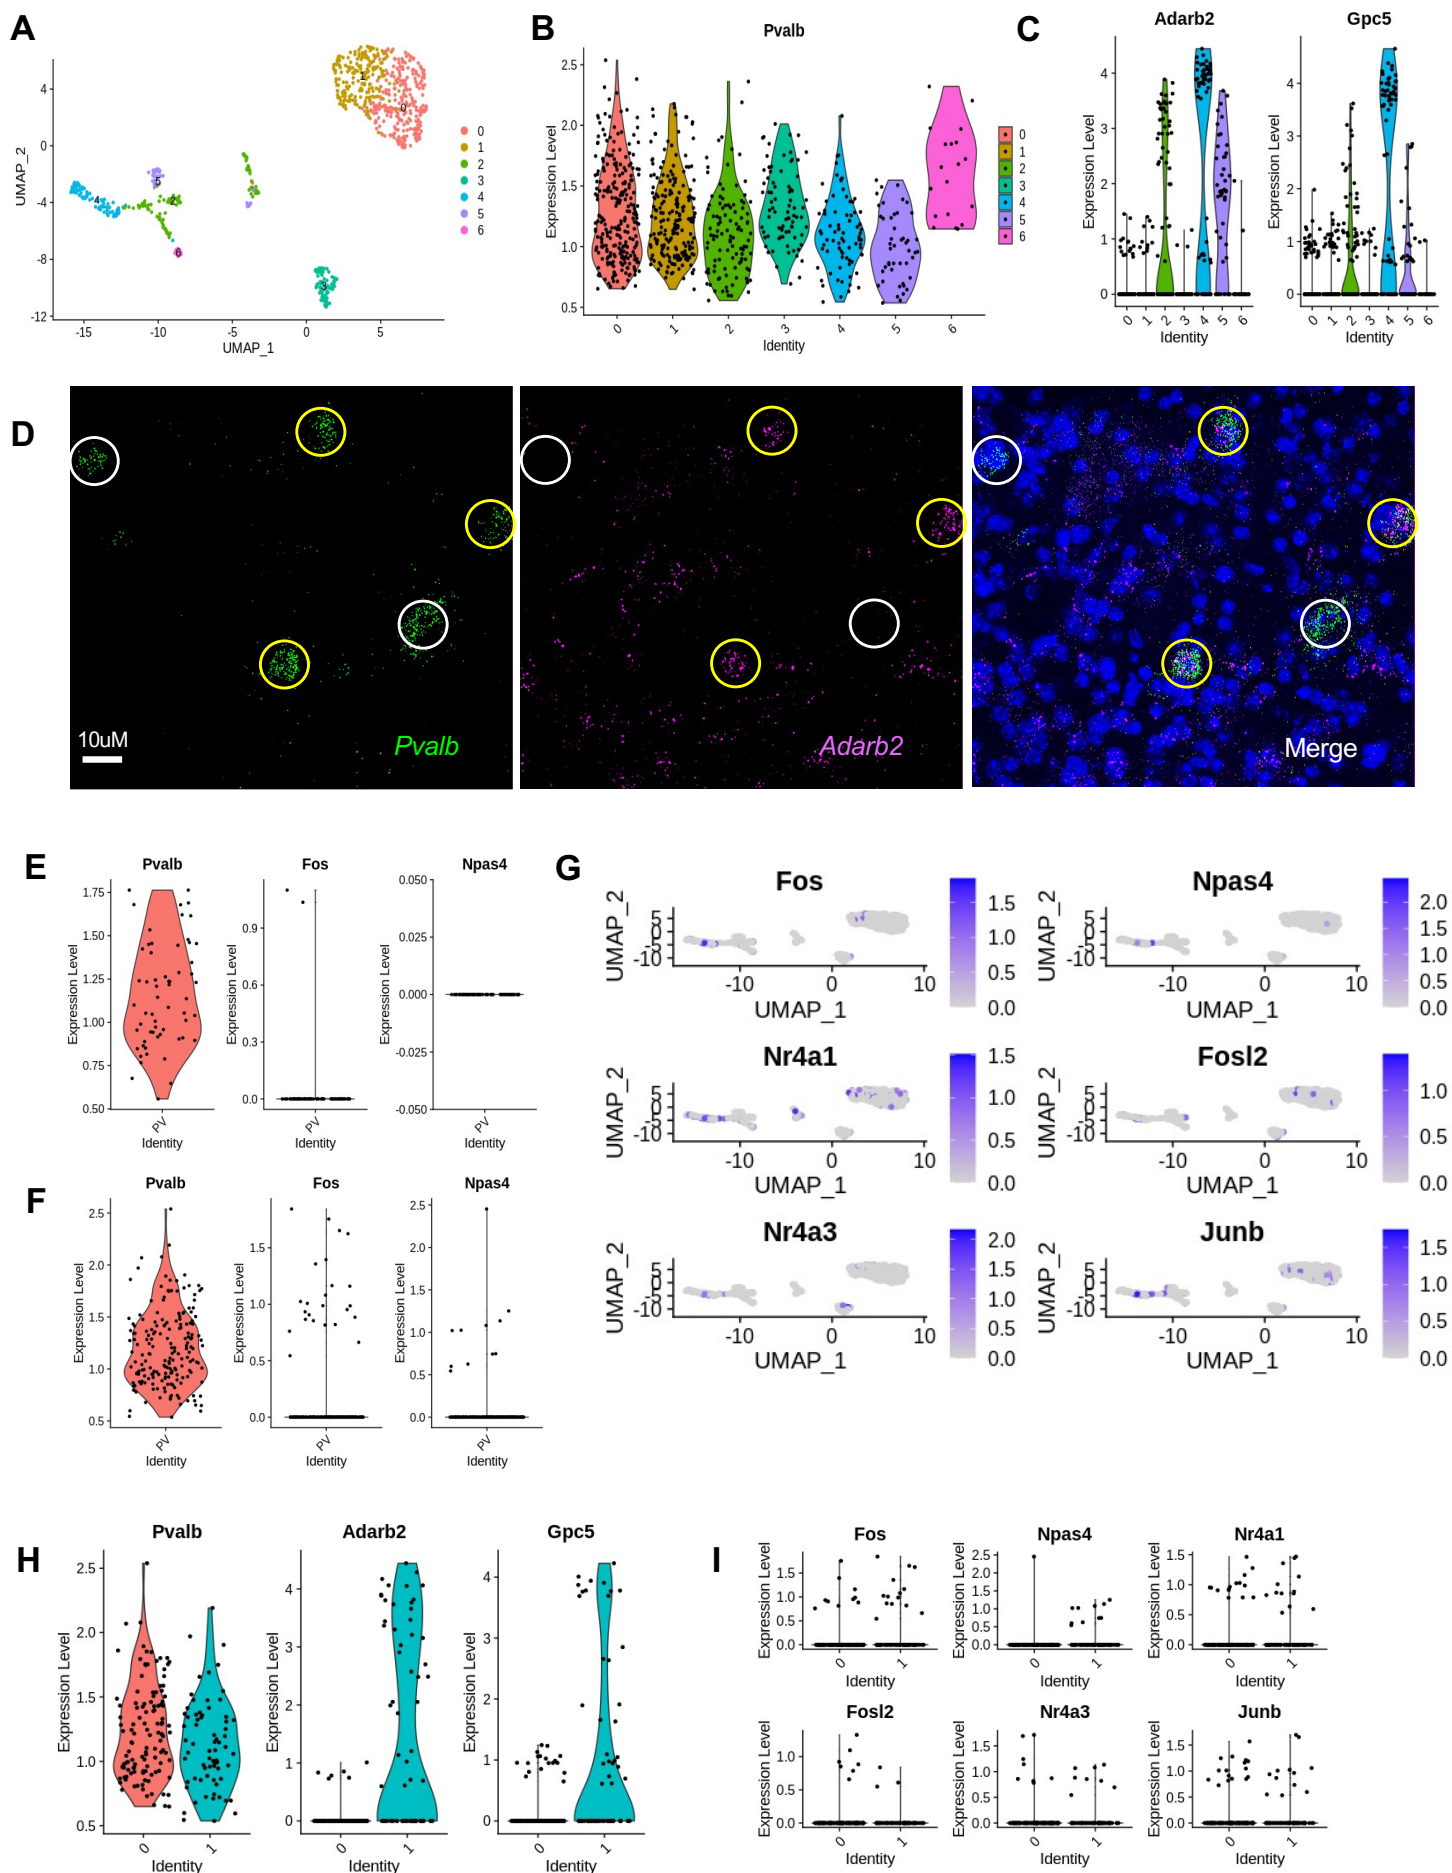

**Figure 5: Single nucleus RNA-seq reveals molecular heterogeneity of PV+ interneurons in the NAc.** **A)** Seven-cluster UMAP projection of snRNAseq data from *Pvalb*-Cre nuclei isolated with FANS; n= 787 nuclei after normalization, scaling, and filtration based on detectable polyadenylated *Pvalb* transcripts. **B)** Violin plot of *Pvalb* log-normalized expression levels in nuclei across the 7 UMAP projection clusters. **C)** Violin plots of log-normalized expression levels of *Adarb2* and *Gpc5* in nuclei across the 7 UMAP projection clusters. **D)** Fluorescent in situ hybridization using probes against *Pvalb* and *Adarb2* in the mouse NAc exhibiting partial colocalization of *Pvalb* and *Adarb2* RNA in single cells; Yellow circles indicate *Pvalb/Adarb2* co-positive cells, white circles indicate *Pvalb+/Adarb2-* cells. **E)** Violin plots of log-normalized expression levels of *Pvalb*, *Fos*, and *Npas4* in nuclei confirmed positive for Multi-seq LMO 5 (top, SAL treated n=60) or LMO6 (bottom, AMPH-treated, n=187). **G)** Feature plots depicting nuclei with detectable transcripts of various PRGs across the 7 UMAP projection clusters. **H)** Violin plot of log-normalized expression levels of *Pvalb*, *Adarb2*, and *Gpc5* in nuclei confirmed positive for Multi-seq LMO 6 (AMPH) in two-cluster UMAP projection of snRNA-seq data from *Pvalb*-Cre nuclei. 0, *Adarb2-/Gpc5-*; 1, *Adarb2+/Gpc5+*. **I)** Violin plot of log-normalized expression levels of various PRGs in two-cluster UMAP projection of snRNA-seq data from *Pvalb*-Cre nuclei confirmed positive for Multi-seq LMO 6 (AMPH) clustered as in **H**.

## Figure 6

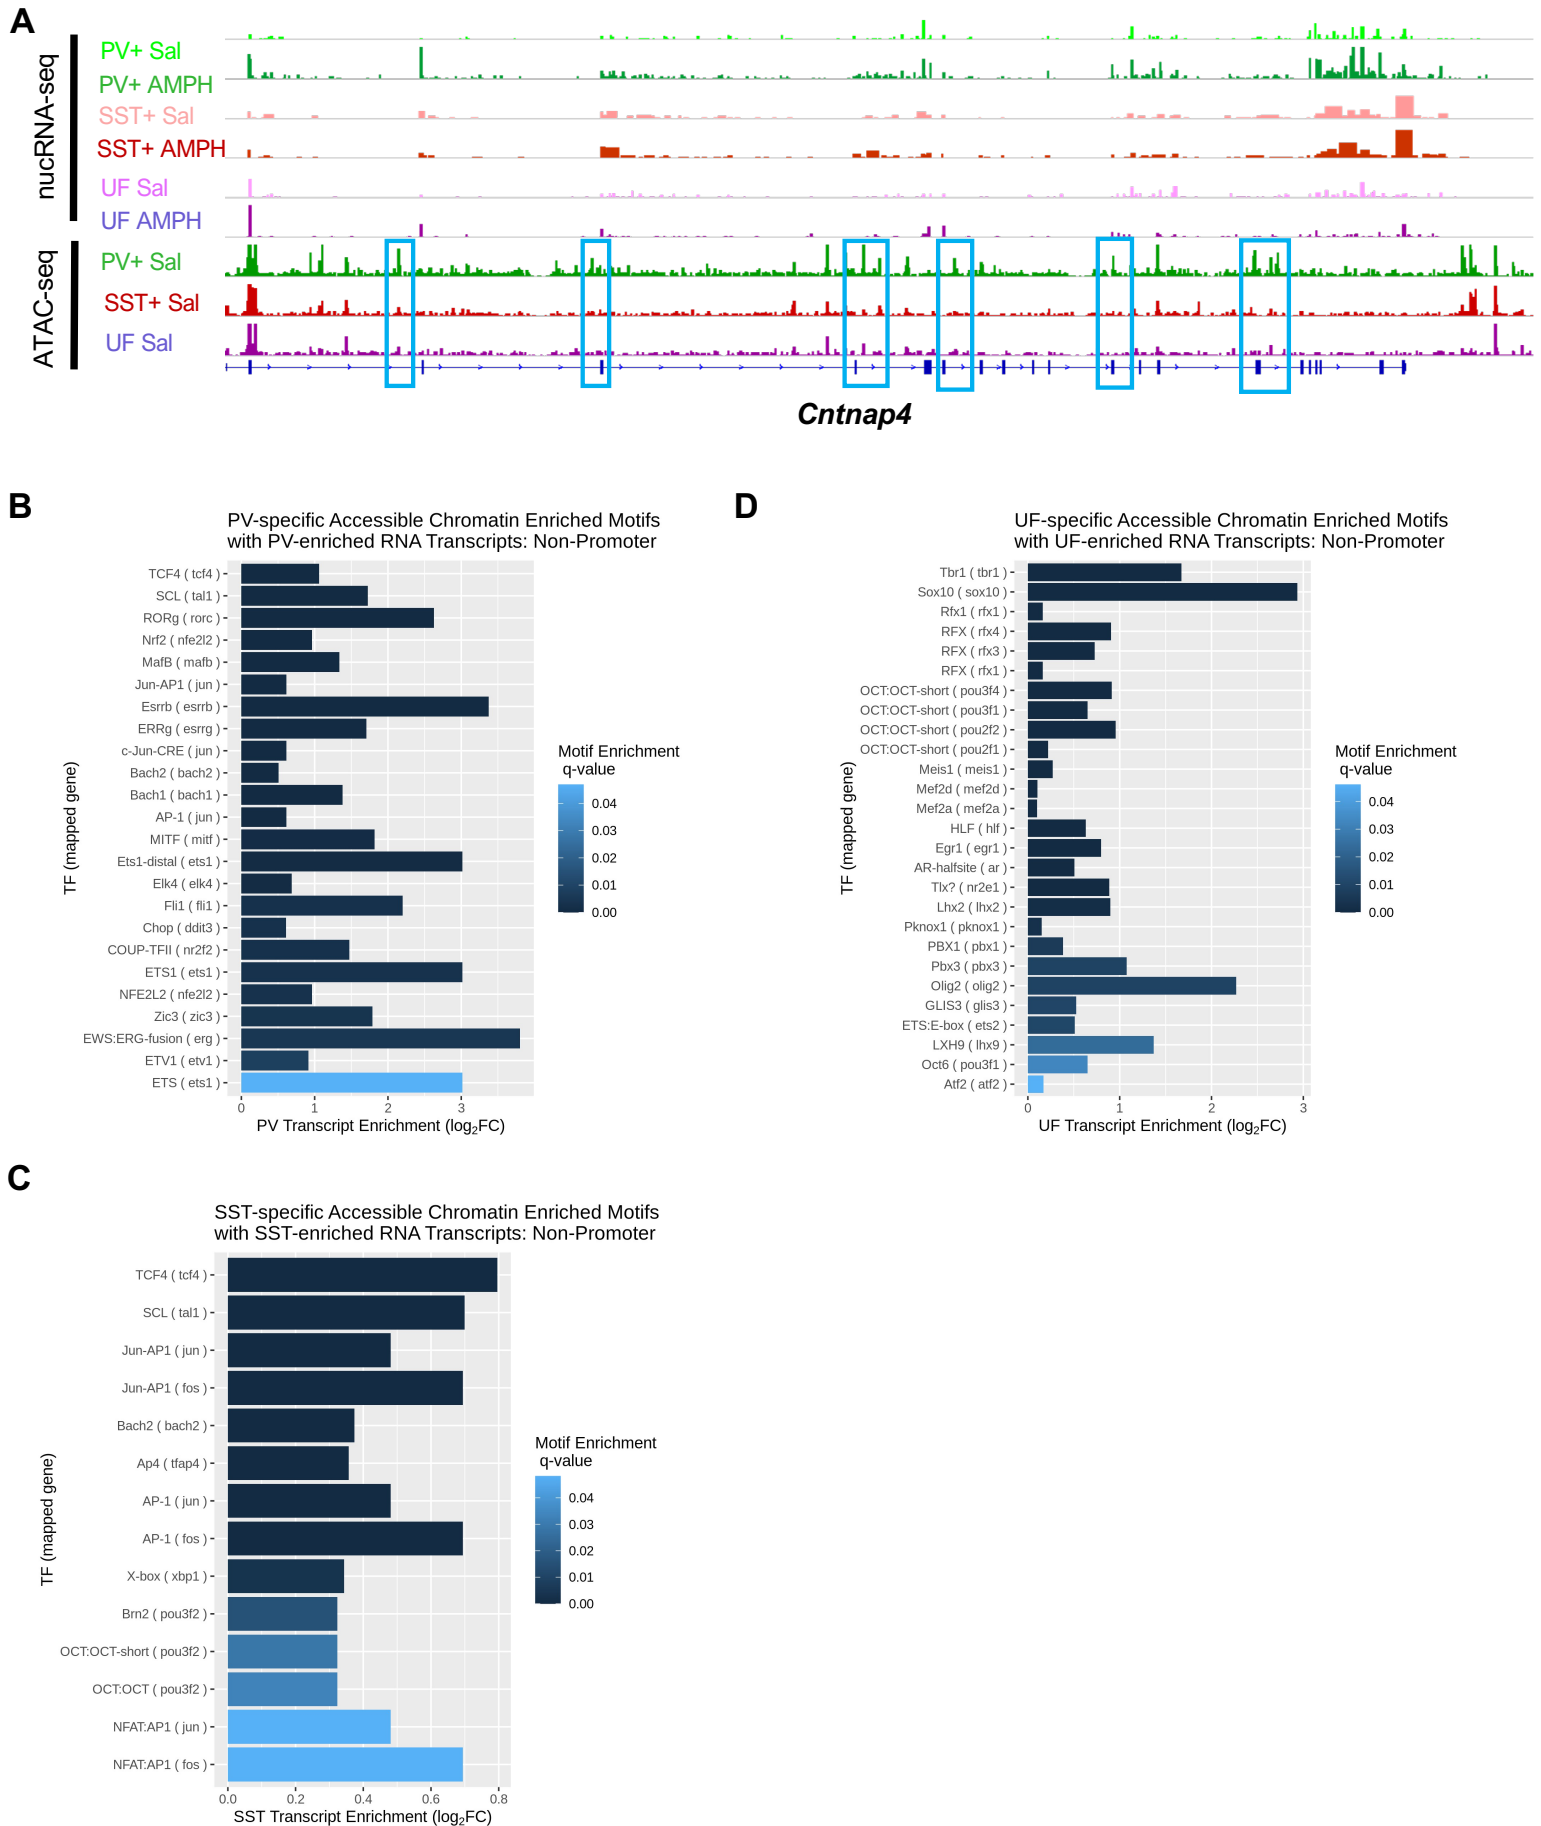



**Figure 6: Motif analysis of differentially accessible chromatin near AMPH-regulated genes suggests transcriptional mechanisms of gene regulation in NAc neurons. **A**** Representative genomic tracks of nuc-RNAseq and ATAC-seq from Sal control only (ATAC) or Sal and AMPH-treated samples (nuc-RNAseq) in the vicinity of the *Cntnap4* gene. nucRNA-seq tracks show significant AMPH-induction of *Cntnap4* RNA specific to the PV+ cell population. ATAC-seq depicts regions within the *Cntnap4* gene significantly differentially accessible within PV+ interneurons (*Pvalb*-Cre IP) outlined in blue. **B-D** Enriched Transcription Factor Motifs as determined by HOMER at cell-type-unique differentially accessible inter- (+/- 50Kb) and intragenic chromatin regions at genes induced by AMPH at 3Hrs in each cell fraction, \* $q < 0.05$ ; Enriched motifs are plotted against log<sub>2</sub>FC enrichment at baseline of cognate RNA transcript in each isolated cell type or UF; *Pvalb*-Cre IP vs UF (**B**), *Sst*-Cre IP vs UF (**C**), Combined UF vs Combined IP (*Pvalb*-Cre+*Sst*-Cre IP)(**D**).

## Figure 7

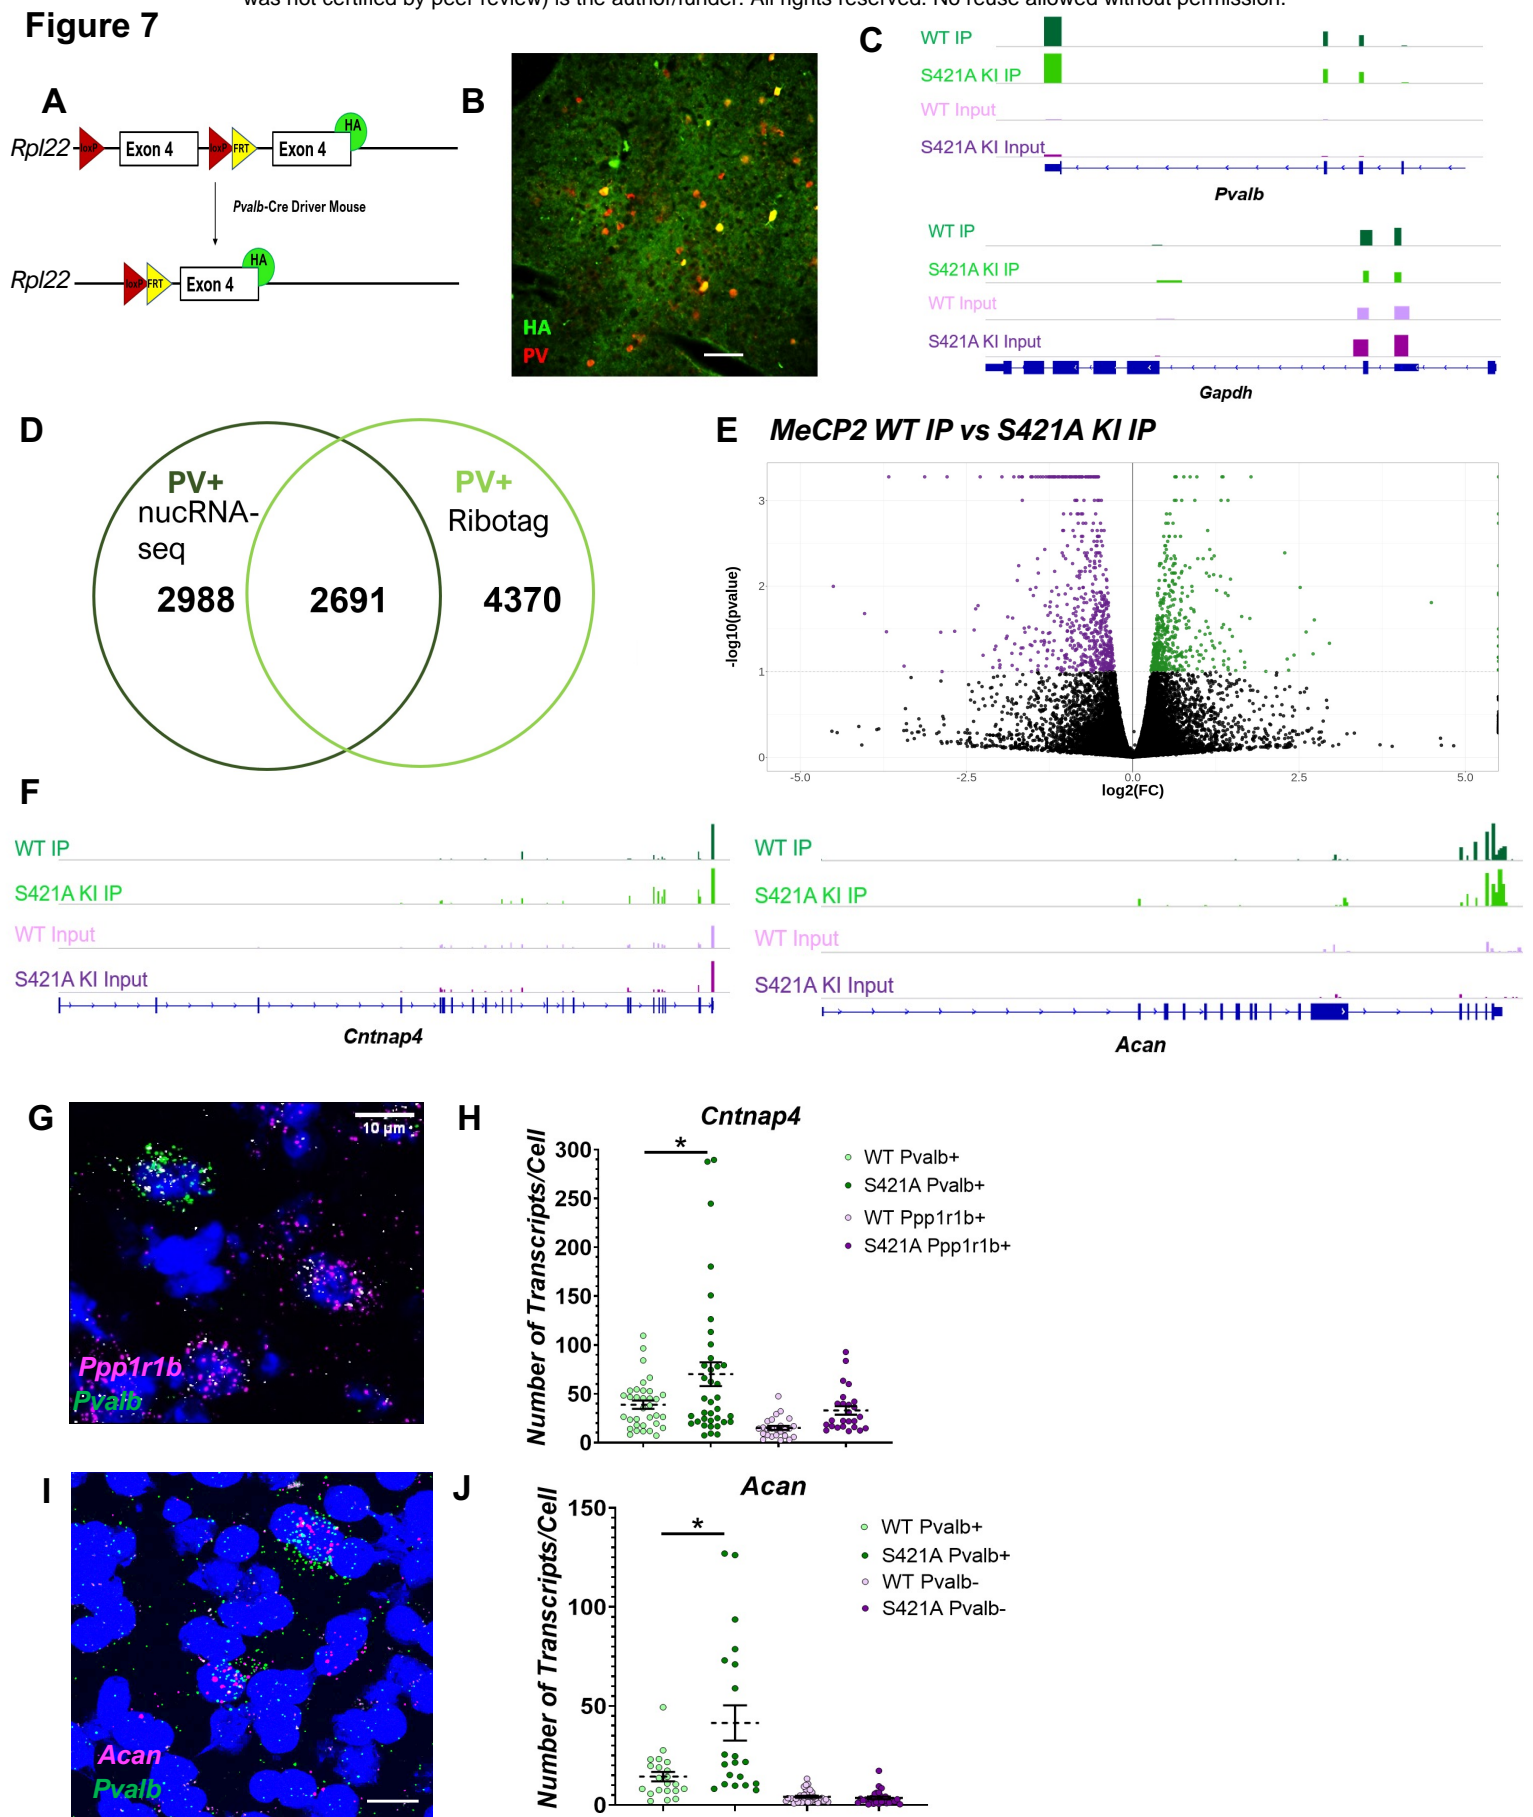

**Figure 7: Gene dysregulation in NAc PV+ neurons of MeCP2 Ser421Ala knockin mice.**

**A)** Depiction of *Pvalb*-2A-Cre-dependent HA tagging to Rpl22 for cell-type specific (PV+) isolation of actively translating mRNA. **B)** IHC depicting specificity of HA tag expression with PV protein. **C)** Representative genomic tracks at the *Pvalb* gene of WT and S421 KI IP and Input fractions demonstrating significant enrichment of *Pvalb* RNA in the IP conditions. *Gapdh* gene track included as a commonly expressed reference gene in all fractions. Y-axis is consistent across all tracks for each gene. **D)** Venn diagram of overlapping, cell-type specific basal gene enrichment in PV+ cells as measured by nucRNA-seq (dark green) and Ribotag (light green) vs surrounding cells (*Pvalb*-Cre IP vs UF nucRNAseq, WT IP vs WT Input Ribotag). **E)** Volcano Plot of differentially dysregulated genes between MeCP2 WT vs KI immunoprecipitated fractions (IP) in naïve mice; Black dots, not significant; colored dots, FDR<0.1; n=15/genotype, pooled into 3 replicates of 5 mice each. **F)** Representative genomic tracks at the nucRNA-seq AMPH-induced genes *Acan* and *Cntnap4* of WT and Ser421Ala (S421A) KI IP and Input fractions. **G)** Representative image of FISH targeting *Pvalb*, *Ppp1r1b*, and *Cntnap4* mRNA. **H)** smFISH quantification of *Cntnap4* transcript number in *Pvalb*+ or *Ppp1r1b*+ nuclei (n=34 WT PV, 37 KI PV+ nuclei, 24 WT SPN nuclei, 24 KI SPN nuclei); Two-way ANOVA, F (1, 117) = 8.943, \*p=0.0034, Bonferroni post-hoc *Pvalb* WT vs S421A p=.0226. **I)** Representative image of FISH targeting *Pvalb* and *Acan* mRNA. **J)** smFISH quantification of *Acan* transcript number in *Pvalb*+ or *Ppp1r1b*+ nuclei (n=21 WT *Pvalb*+, 20 KI *Pvalb*+ nuclei, 37 WT *Ppp1r1b*+ nuclei, 28 KI *Ppp1r1b*+ nuclei) Two-way ANOVA, F (1, 102) = 13.47, \*p=0.0004, Bonferroni post-hoc *Pvalb*+ WT vs S421A p<.0001.

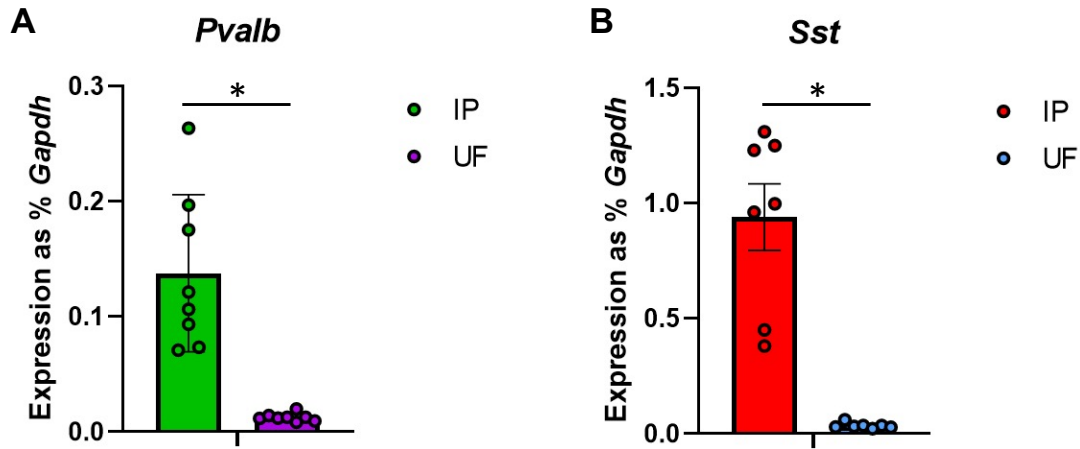

**Figure S1: Q-RT-PCR validation of interneuron marker gene enrichment in INTACT IP fractions.** Prior to the NucRNA-seq in Figure 1, portions of harvested nucRNA from each IP and UF were processed for Q-RT-PCR for *Pvalb* (**A**) or *Sst* (**B**). All samples were normalized to expression of the housekeeping gene *Gapdh* in the same sample. N=8 *Pvalb-Cre* and 7 *Sst-Cre*. Paired t-test, two tailed,  $p=.0001$  (*Pvalb-Cre*),  $p = .0007$  (*Sst-Cre*). Bars show mean and error bars indicate SEM.

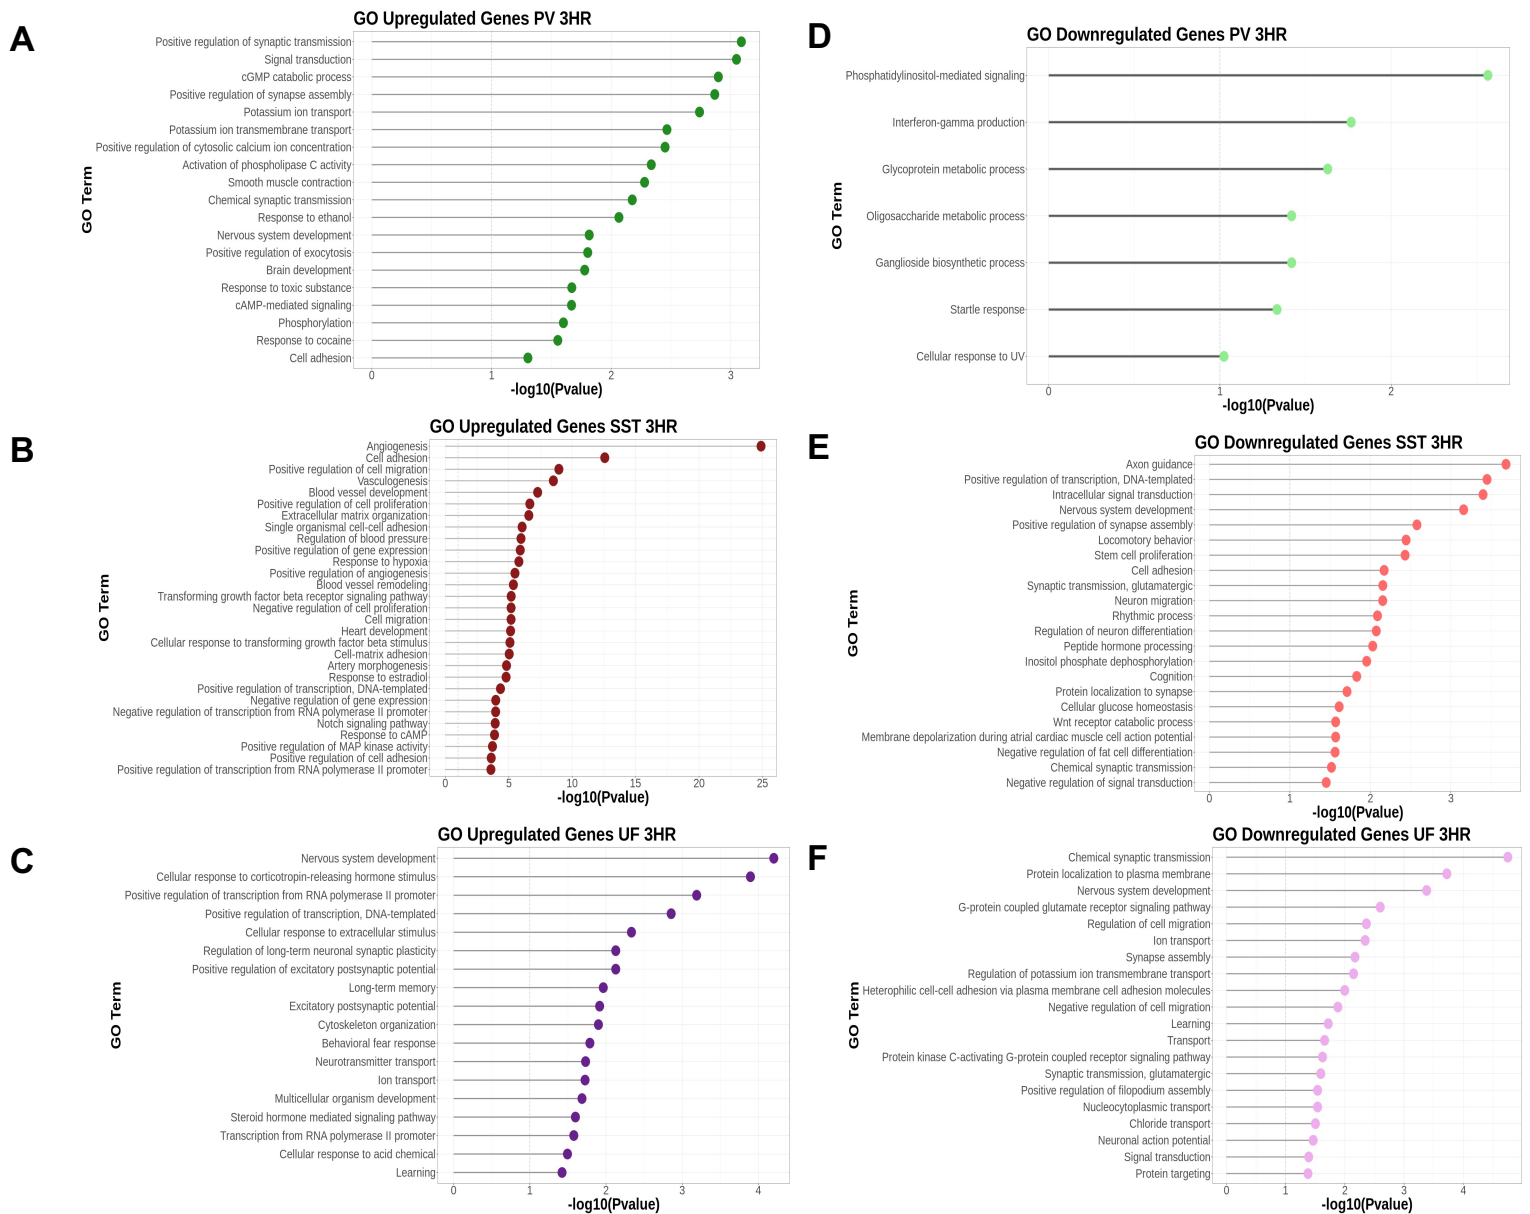

**Figure S2: Gene Ontology Analysis of AMPH-regulated Delayed Primary and Secondary Response Gene Programs A-C) DAVID Gene Ontology (GO) analysis of genes induced by AMPH at 3hr post-administration. Shown are enriched Biological Function (BF) GO terms for genes upregulated by AMPH in each population of nuclei *Pvalb*-Cre IP, Green (A); *Sst*-Cre IP, red (B); Combined UF (C), purple; \* $p < 0.05$ . D-F) DAVID Gene Ontology (GO) analysis of genes downregulated by AMPH at 3hr post-administration. Shown are enriched Biological Function (BF) GO terms for genes downregulated by AMPH in each population of nuclei *Pvalb*-Cre IP, Green (D); *Sst*-Cre IP, red (E); Combined UF (F), purple; \* $p < 0.05$ .**

### Spearman Correlation ATAC-seq Replicates

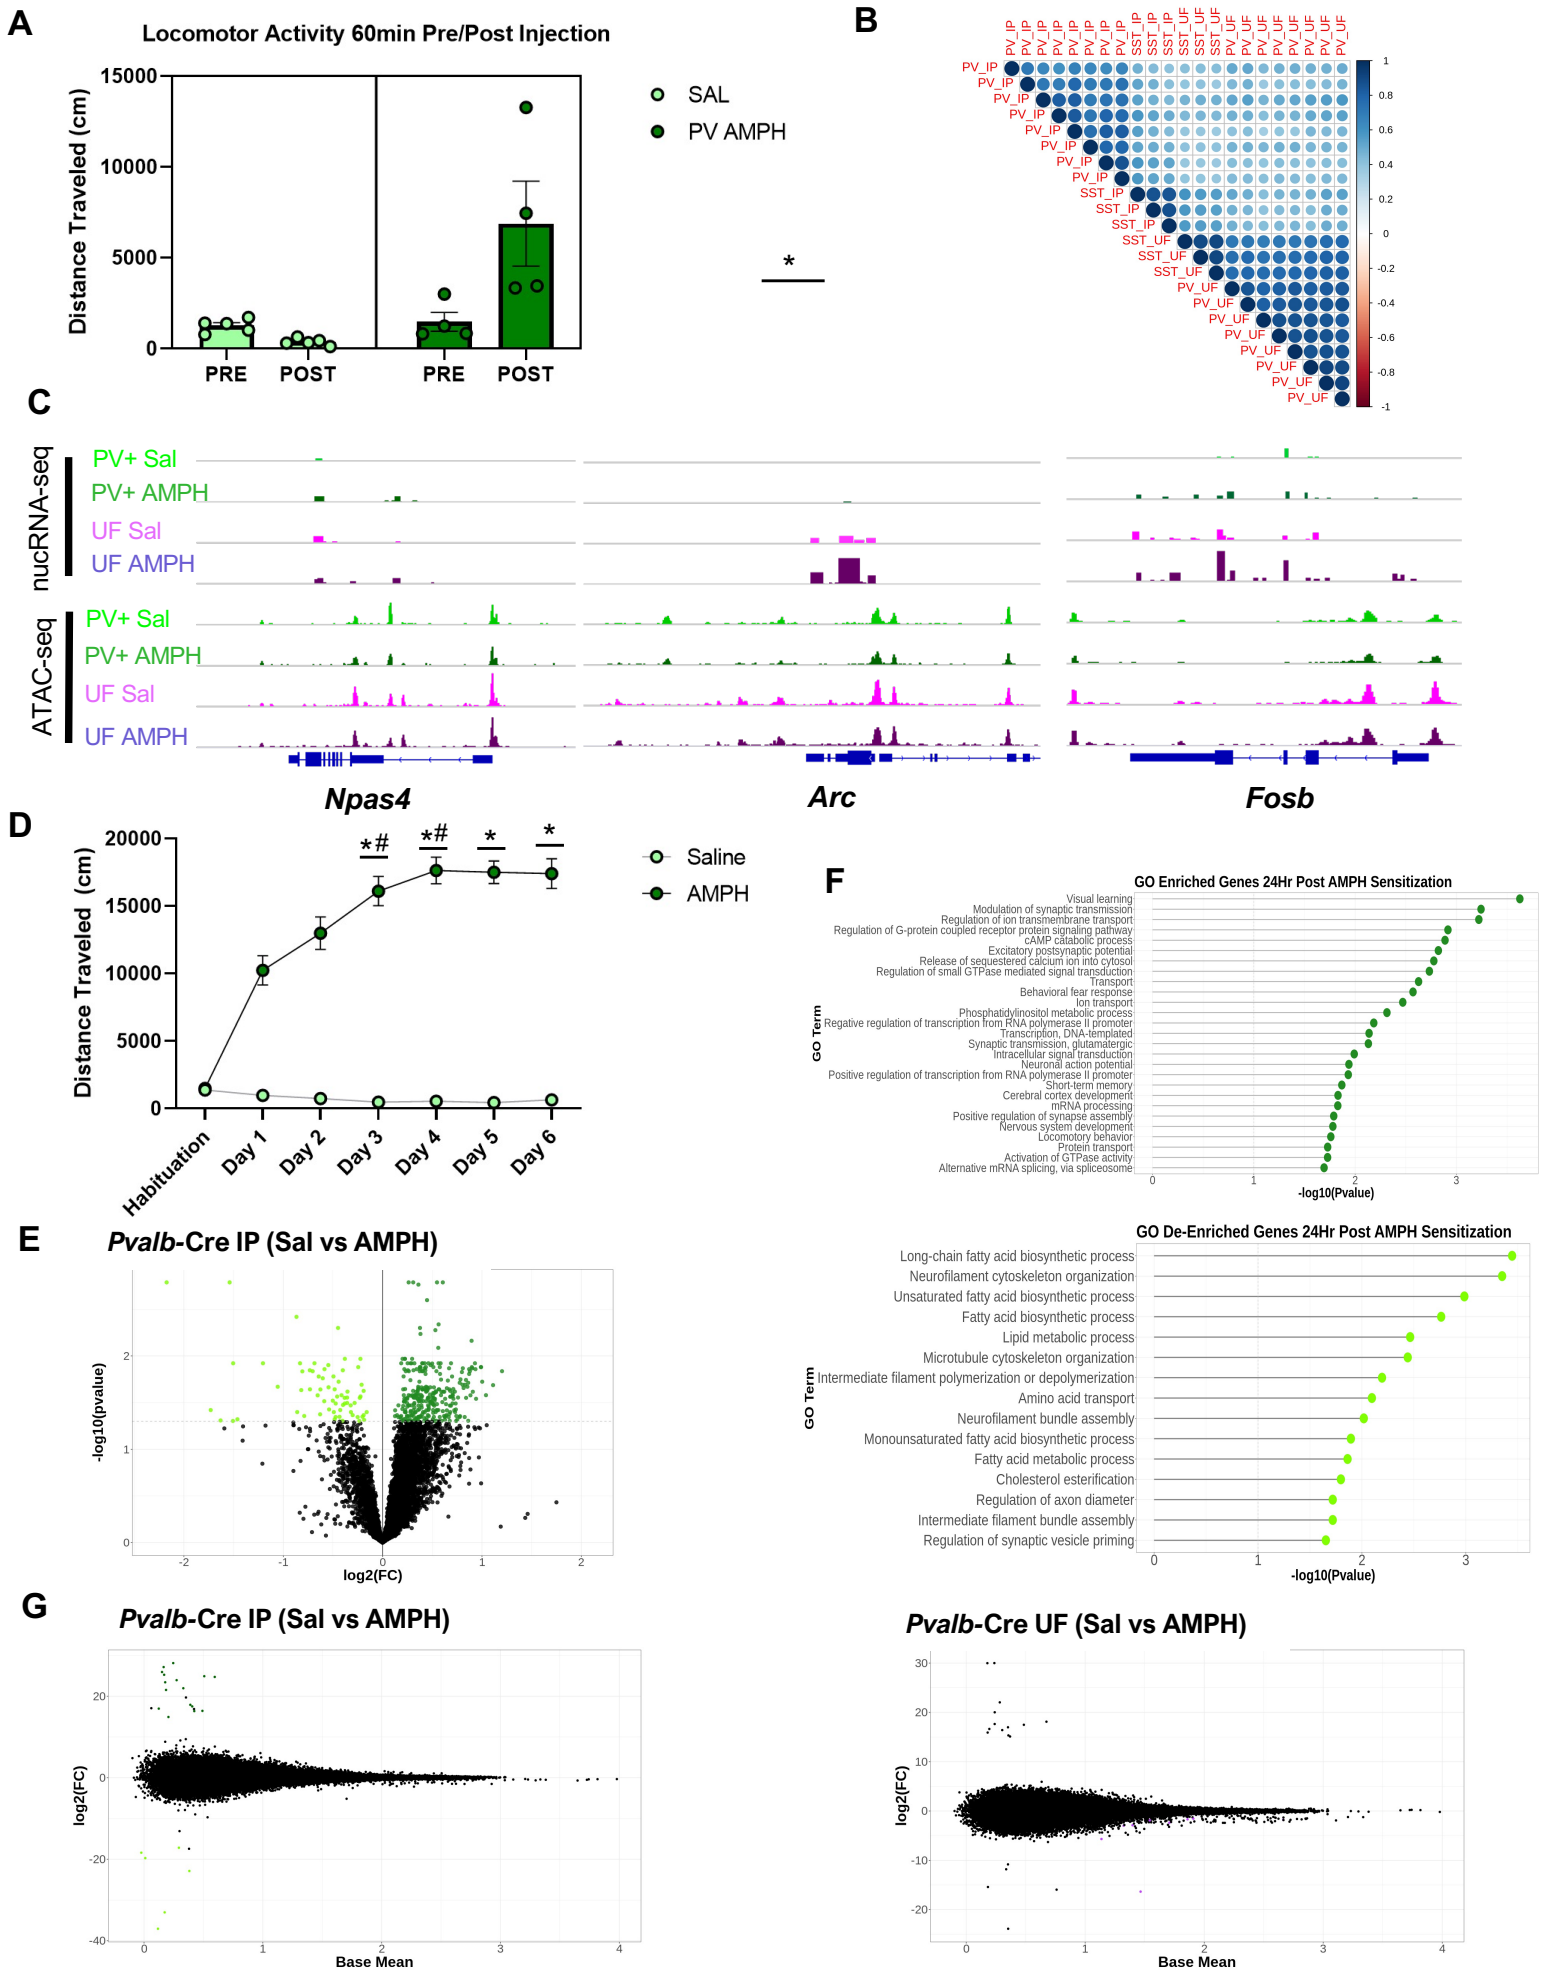

**Figure S3: A)** Locomotor activity 60 min before (Pre) and 60 min after (Post) acute i.p. injection of saline (light green) or 3mg/kg AMPH (dark green). *Pvalb*-Cre n=4/treatment condition; Two-way ANOVA, *Pvalb*-Cre  $F(1, 7) = 13.80$ ,  $p=0.0075$ , Bonferroni's post-hoc PV AMPH Pre vs Post  $p=0.0073$ , Error bars indicate SEM. **B)** Spearman Correlogram of variance-stabilized counts for each ATAC-seq sample (*Pvalb*-Cre IP, *Sst*-Cre IP, Combined UF). **C)** Representative nucRNA-seq tracks of AMPH-induced PRGs *Arc*, *Npas4*, and *Fosb* with associated ATAC-seq tracks of chromatin accessibility surrounding each gene. **D)** Post-Injection locomotor activity on each of 7 days in open field chamber. Day 0 was habituation to chamber with a mock i.p. injection, followed by daily i.p. injections of either Sal or 3mg/kg AMPH on days 1-6. ATAC-seq was performed on nuclei harvested from dissected NAc of individual mice 24hr after Day 6 injection; Locomotor sensitization is observed in mice receiving AMPH. *Pvalb*-Cre n=4/treatment condition. Mixed Effects Model,  $F(6, 123) = 79.67$   $p<.0001$ , Bonferroni post-hoc  $*p<0.01$  vs Day 1;  $\#p<0.01$  vs Day 2, Error bars indicate SEM **E)** Volcano plots of differential gene expression in immunoprecipitated PV+ cells in *Pvalb*-Cre IP (green) at 24hr following daily injections of either Sal or AMPH as described above  $*FDR<0.05$ . **F)** DAVID Gene Ontology (GO) analysis of differentially expressed genes at 24hr post repeated Sal/AMPH administration. Shown are enriched Biological Function (BF) GO terms for genes upregulated (dark green) or downregulated (light green) in the immunoprecipitated population of *Pvalb*-Cre nuclei,  $*p<0.05$  **G)** MA plots of AMPH-induced differential chromatin accessibility in each population of isolated nuclei 24-hrs after 6 days of repeated treatment with either Sal or AMPH using DeSeq2  $*FDR<.05$ ; *Pvalb*-Cre IP n=4 AMPH, n=3 Sal, *Pvalb*-Cre UF n=4/treatment condition.

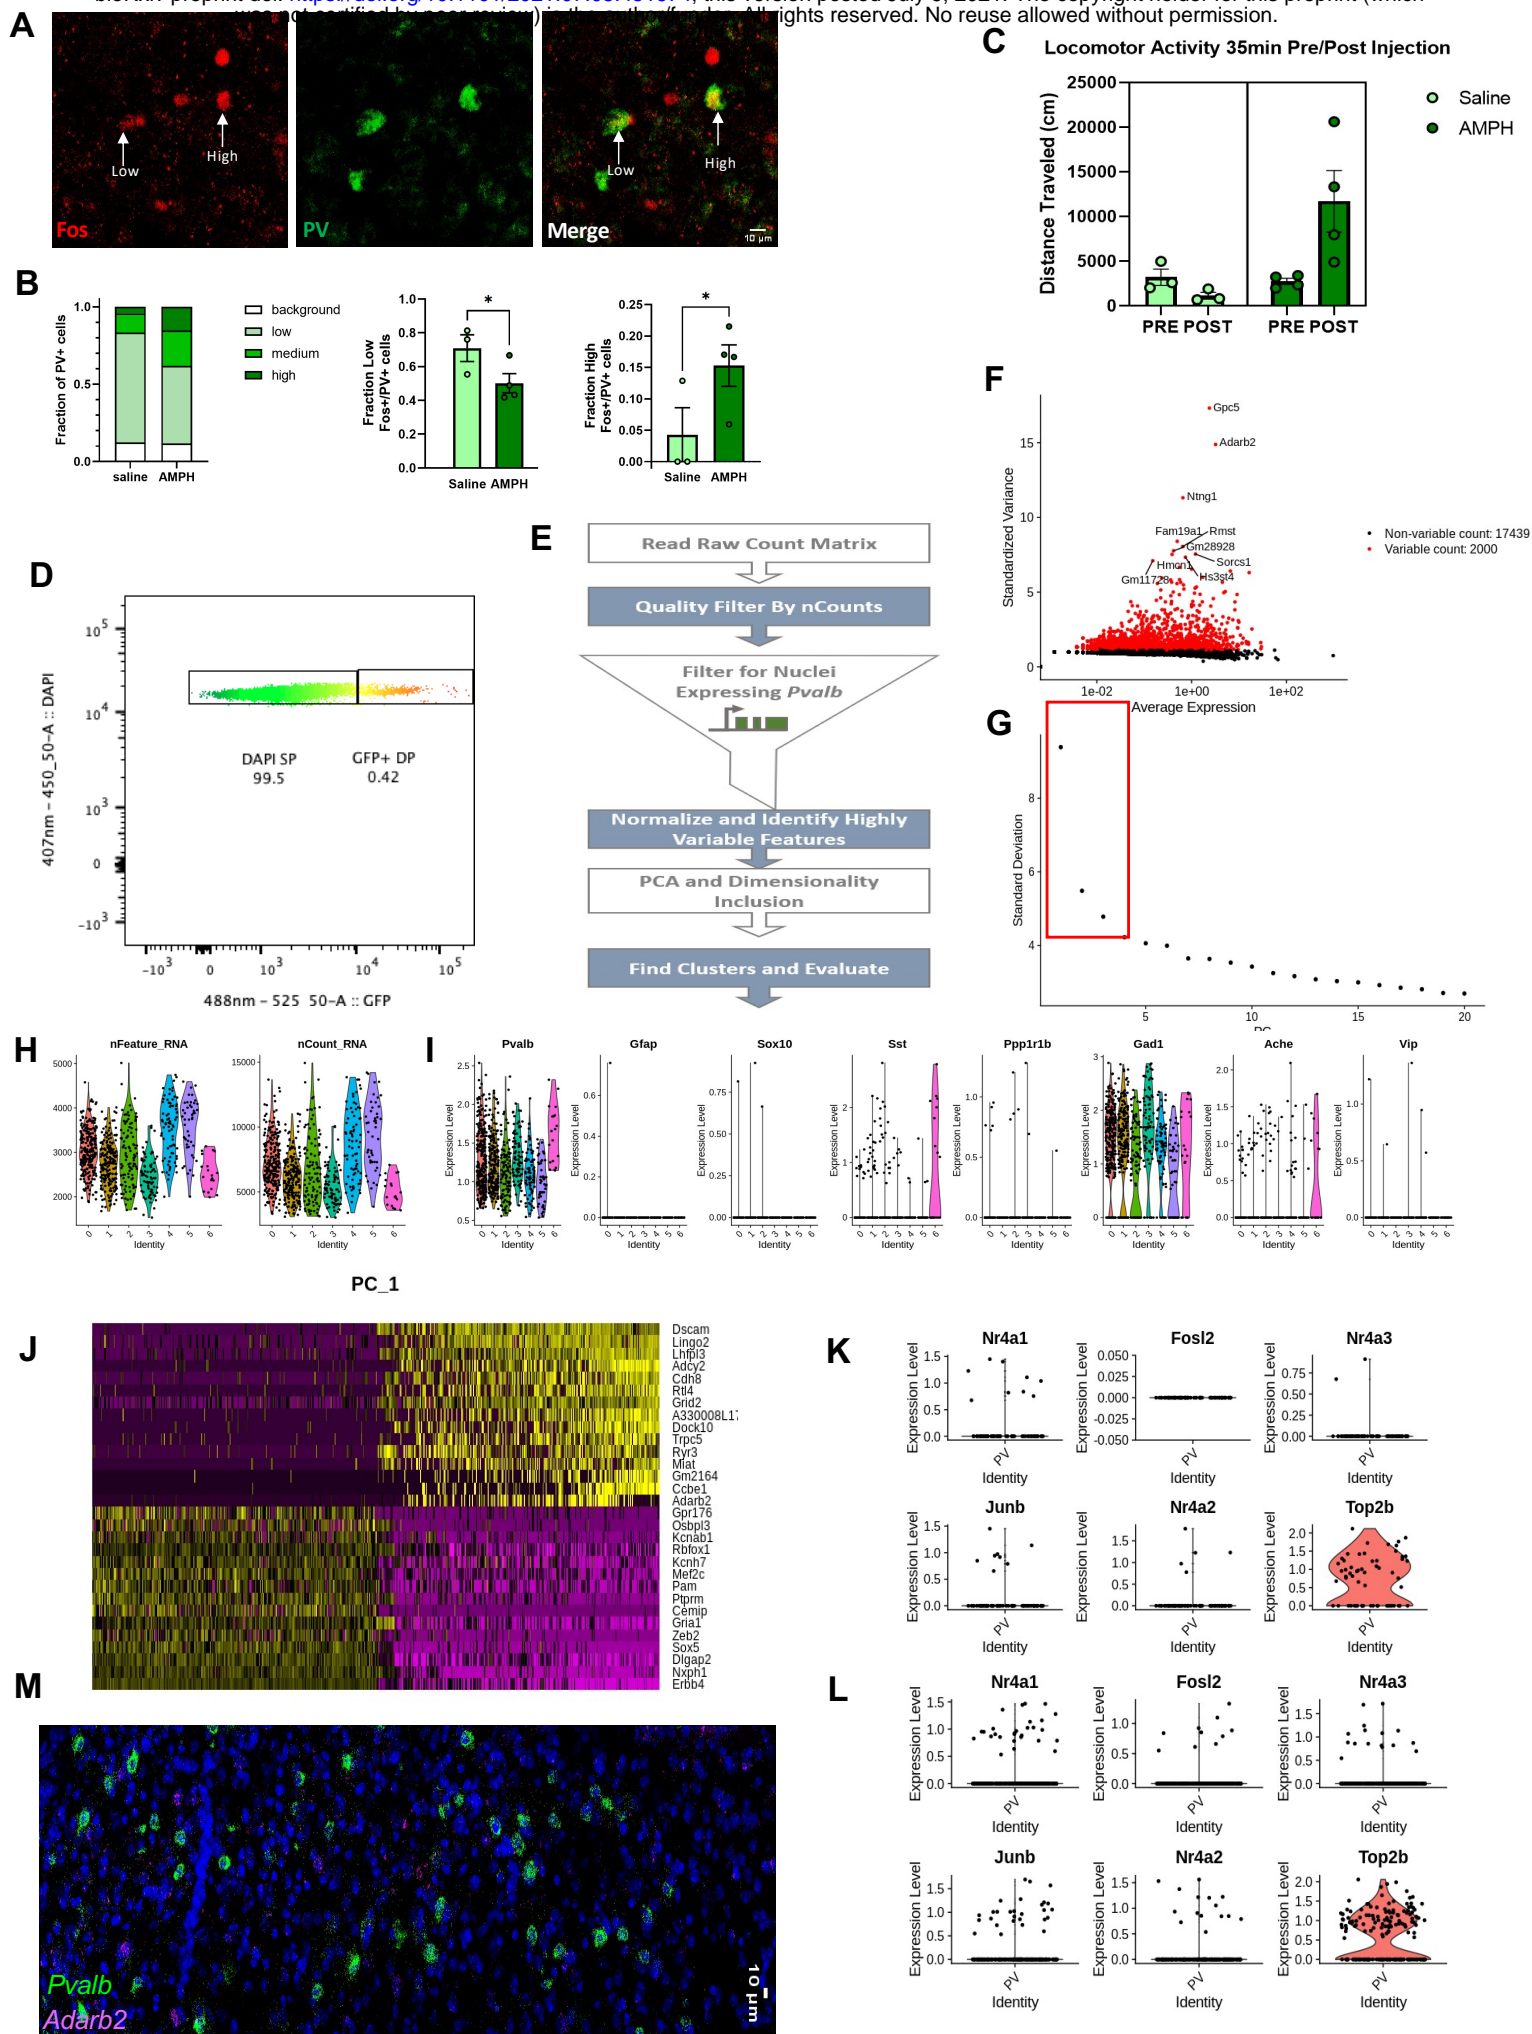



**Figure S4: A)** Representative images of NAc slices immunohistochemically stained with antibodies against Fos and PV 2 Hrs following acute injection of 3mg/kg AMPH. Example PV+ cells binned into low and high Fos immunofluorescence categories are indicated with labeled arrows. **B)** Quantified relative frequency of Fos IHC fluorescence intensity in immunohistochemically positive PV cells of the NAc; Cells binned into Background (0-1.5x), Low (1.5-3x), Medium (3-4.5x), and High (4.5x+) groups based on Fos fluorescence intensity relative to average background fluorescence intensity in the same channel. Per bin one-tailed t-test, \*p<0.05 Error bars indicate SEM. **C)** Locomotor activity 60 min before (Pre) and 35 min after (Post) i.p. injection of saline (light green) or AMPH (dark green) for *Pvalb*-Cre mice pooled and used for FANS. *Pvalb*-Cre n=3 LMO 5/SAL, n=4 LMO6/AMPH Two-way rmANOVA, F (1, 5) = 6.402, TimeXTreatment p=0.0525, Bonferroni post-hoc p=0.0513 **D)** Fluorescence intensity plot showing fluorescence intensity at 407nm and 488nm amongst pooled *Pvalb*-Cre NAc nuclei submitted for FANS. Gating criteria/region for DAPI/GFP double-positive (DP) nuclei harvested for snRNA-seq is shown with a white square, compared to DAPI single-positive (SP) nuclei. **E)** Summary flow chart of pipeline used for Seurat analysis of snRNA-seq data. **F)** Plot of genes contributing to the greatest amount of dispersion (Variance contribution vs average expression) using FindVariableGenes function in Seurat 3.1.5 **G)** Elbow plot of variance explained by each Principal Component (PC) using the RunPCA function in Seurat 3.0; PCs/dims used for downstream UMAP generation are indicated by a red box. **H)** Violin plot of Features/Genes as well as Counts/Molecules detected in each nucleus across the 6 UMAP projection clusters snRNA-seq following filtration based low counts and detectable *Pvalb* transcripts. **I)** Violin plots of log-normalized expression levels of NAc cell-type marker genes in nuclei across the 6 UMAP projection clusters. **J)** Heatmap of high-variance genes contributing to integrates PC1 **K-L)** Violin plots of log-normalized expression levels of various PRGs in nuclei confirmed positive for Multi-seq LMO 5 (K, Sal treated n=60) or LMO6 (L, AMPH-treated, n=187).

**A**

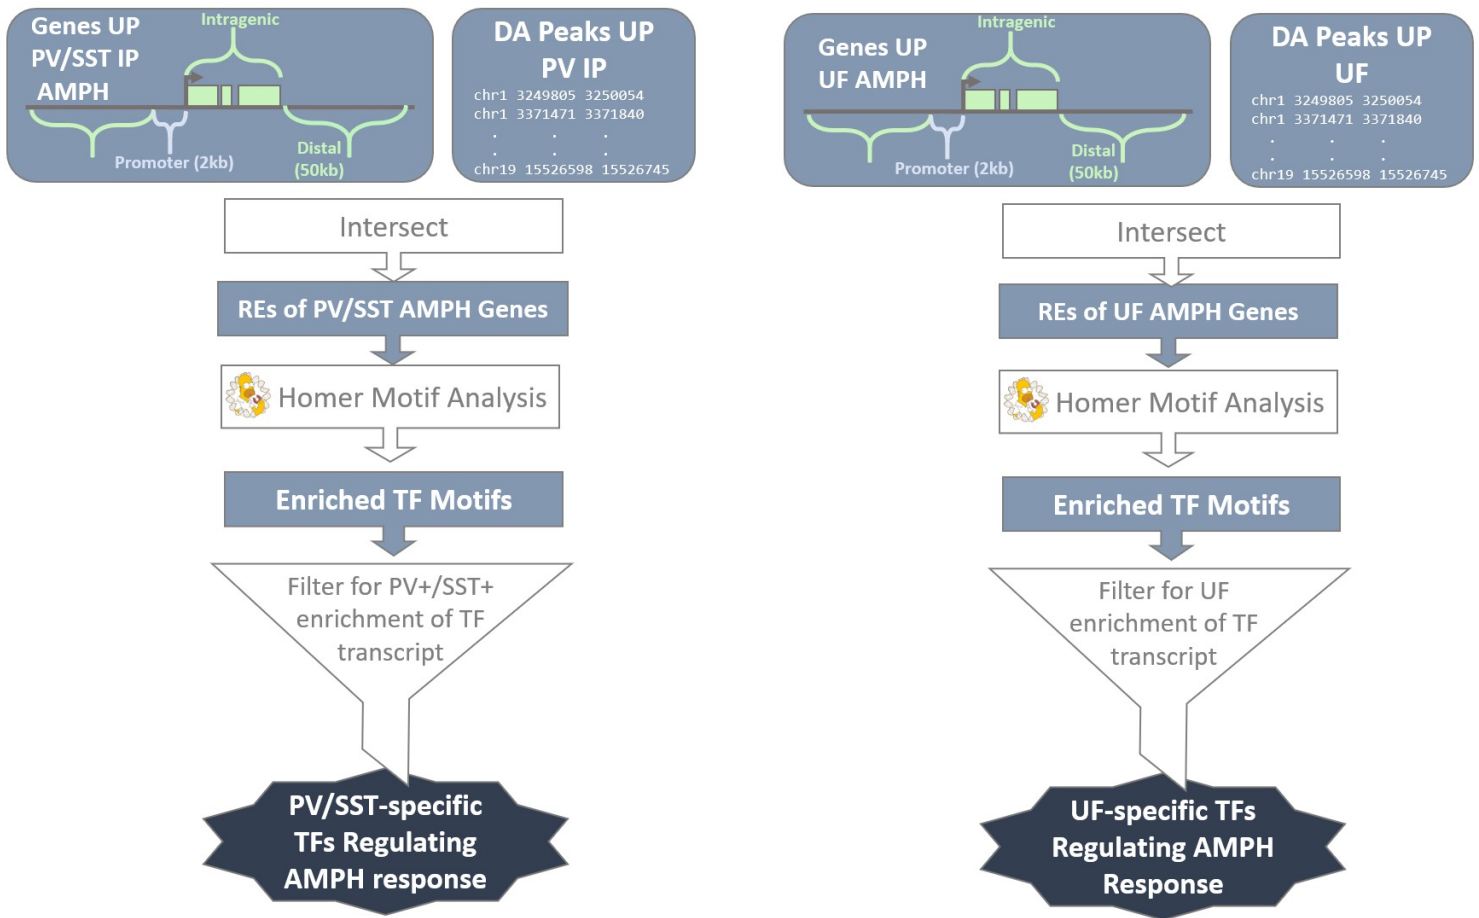

**B**

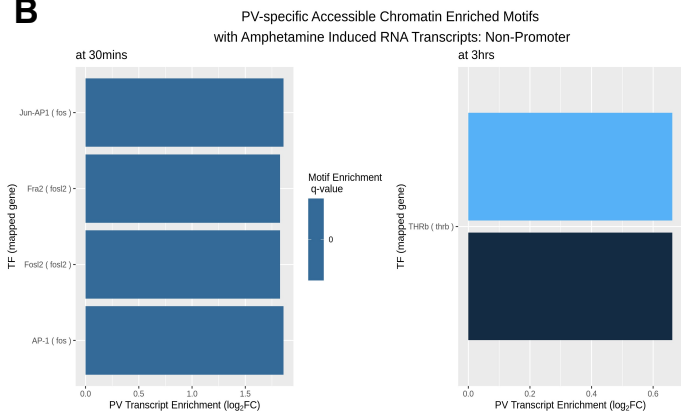

**D**

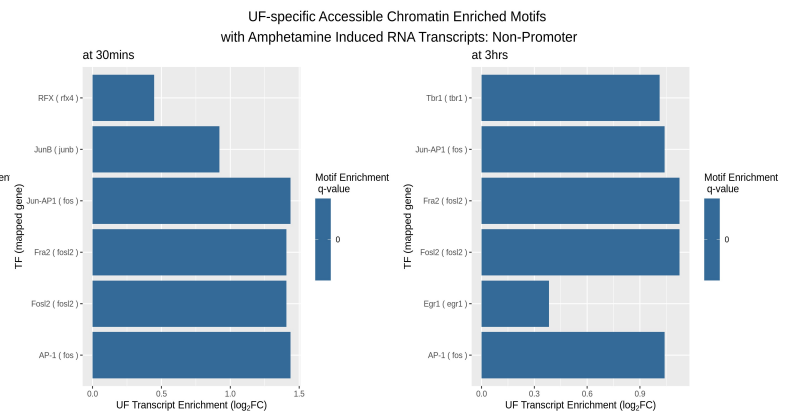

**C**

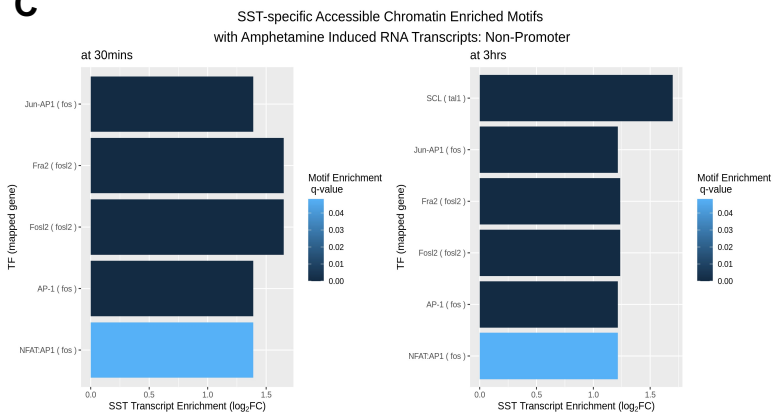

**Figure S5: A)** Informatic flow chart of Transcription Factor Motif enrichment and RNA-enrichment analysis pipeline in *Pvalb*-Cre/*Sst*-Cre IP and Combined UF nuclei. **B-D)** Enriched Transcription Factor Motifs as determined by HOMER at cell-type-unique differentially accessible inter- (+/- 50Kb) and intragenic chromatin regions at genes induced by AMPH at 3Hrs in each cell fraction, \* $q < .05$ ; Enriched motifs are plotted against log<sub>2</sub>FC of induction by AMPH at 35min or 3hrs post AMPH of cognate RNA transcript in each isolated cell type or UF; *Pvalb*-Cre IP vs UF (B), *Sst*-Cre IP vs UF (C), Combined UF vs Combined IP (*Pvalb*-Cre+*Sst*-Cre IP).

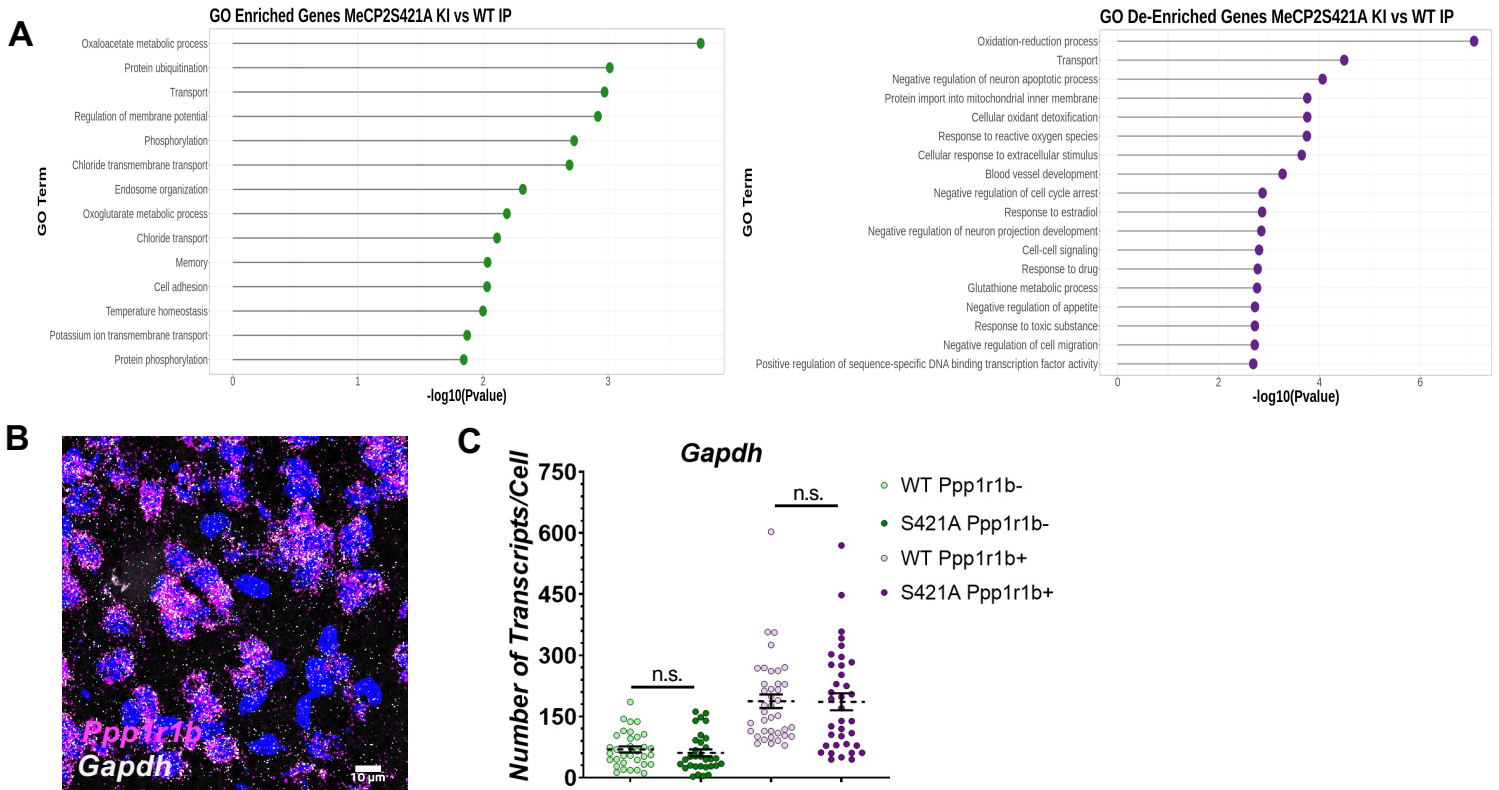

**Figure S6: A)** DAVID Gene Ontology (GO) analysis of differentially expressed genes between MeCP2Ser421Ala KI IP and WT IP. Shown are enriched Biological Function (BF) GO terms for genes upregulated (dark green) or downregulated (purple) in the immunoprecipitated population of *Pvalb*-Cre nuclei \* $p < .05$  **B)** Representative smFISH image of *Ppp1r1b* and *Gapdh* fluorescent labeling **C)** Reference smFISH quantification of *Gapdh* transcript number based on punctate fluorescent signature in *Ppp1r1b*+ or *Ppp1r1b*- nuclei ( $n = 39$  WT *Ppp1r1b*+,  $36$  KI *Ppp1r1b*+ nuclei,  $33$  WT *Ppp1r1b*- nuclei,  $31$  KI *Ppp1r1b*+ nuclei) Two-way ANOVA,  $F(1, 135) = 0.1044$ ,  $p = .7471$ .

## List of Supplementary Tables

### **Table S1-NAc PV and SST nucRNAseq**

Differentially expressed genes (DEGs) calculated comparing nuclear RNAseq data from immunoprecipitated (IP) nuclei of PV or SST neurons compared with nuclei of their respective Unbound Fractions (UF). Data are shown in TPM (transcripts per million bases mapped). Data for all genes is shown on the tabs labeled ALL.

### **Table S2-Rapid AMPH nucRNAseq**

Differentially expressed genes (DEGs) 35 min after exposure to 3mg/kg AMPH (i.p.) compared against saline (SAL) as control. Nuclear RNAseq data is from immunoprecipitated (IP) nuclei of PV or SST neurons or cells from the combined Unbound Fractions (UF). Data are shown in TPM (transcripts per million bases mapped). Data for all genes is shown on the tabs labeled ALL.

### **Table S3 -Delayed AMPH nucRNAseq**

Differentially expressed genes (DEGs) 3hr after exposure to 3mg/kg AMPH (i.p.) compared against saline (SAL) as control. Nuclear RNAseq data is from immunoprecipitated (IP) nuclei of PV or SST neurons or cells from the combined Unbound Fractions (UF). Data are shown in TPM (transcripts per million bases mapped). Data for all genes is shown on the tabs labeled ALL.

### **Table S4-NAc PV and SST ATACseq**

Differentially open chromatin regions calculated comparing nuclear ATACseq data from immunoprecipitated (IP) nuclei of PV or SST neurons compared with nuclei of their respective Unbound Fractions (UF).

### **Table S5-Rapid AMPH ATACseq**

Differentially open chromatin regions in either NAc PV neurons (IP) or nuclei of the unbound fraction (UF) 60 min after exposure to 3mg/kg AMPH (i.p.) compared against saline (SAL) as control.

### **Table S6-Repeated AMPH nucRNAseq**

Differentially expressed genes (DEGs) 24hr after 6 days of exposure to 3mg/kg AMPH (i.p.) compared against saline (SAL) as control. Nuclear RNAseq data is from immunoprecipitated (IP) nuclei of PV neurons or cells from the Unbound Fraction (UF). Data are shown in TPM (transcripts per million bases mapped). Data for all genes is shown on the tabs labeled ALL.

### **Table S7-Repeated AMPH ATACseq**

Differentially open chromatin regions in either NAc PV neurons (IP) or nuclei of the unbound fraction (UF) 24 hrs after 6 days exposure to 3mg/kg AMPH (i.p.) compared against saline (SAL) as control.

### **Table S8-NAc PV+ snRNAseq**

Gene counts per single nucleus filtered for FACS sorted nuclei with *Pvalb* expression. Tabs show the most variable genes across all nuclei and between *Adarb2*<sup>+</sup> and *Adarb2*<sup>-</sup> populations.

### **Table S9-TF motifs in open chromatin near AMPH-regulated genes**

TF motifs identified by Homer in celltype differentially accessible regions of chromatin flanking genes that show regulation by AMPH. AMPH regulation of TF expression is from Table S3.

**Table S10-NAc PV+ RNA in MeCP2WTvsKI**

Differentially expressed genes (DEGs) in translating RNA expressed in NAc PV+ neurons of MeCP2 WT or Ser421Ala KI mice. Average values shown in FPKM. Data for all genes is shown on the tabs labeled ALL.
